# Supplementary material for: Bimetallic copper and zinc-catalyzed oxidative cycloaddition of 3-aminopyridazines and nitriles: a direct synthesis of 1,2,4-triazolo[1,5-b]pyridazines via C–N and N–N bond-forming process
Source: Royal Society of Chemistry journal article supplement (doi:10.1039/c7ra06727e), 2017-01-01

## Supporting Information

### **Bimetallic Copper and Zinc -Catalyzed Oxidative Cycloaddition of 3-Aminopyridazines and Nitriles: A Direct Synthesis of 1,2,4-Triazolo[1,5-b]pyridazines via C-N and N-N Bond-forming Process**

Qiu-Chao Mu<sup>a,b</sup>, Ji-Yuan Lv<sup>b</sup>, Mu-Yi Chen<sup>b</sup>, Xing-Feng Bai<sup>a,b</sup>, Jing Chen<sup>\*a</sup>, Chun-Gu Xia<sup>a</sup>,  
and Li-Wen Xu<sup>\*a,b</sup>

<sup>a</sup> State Key Laboratory for Oxo Synthesis and Selective Oxidation Lanzhou Institute of Chemical Physics, Chinese Academy of Sciences, and University of the Chinese Academy of Sciences, P. R. China. E-mail: [liwenxu@hznu.edu.cn](mailto:liwenxu@hznu.edu.cn).

<sup>b</sup> Key Laboratory of Organosilicon Chemistry and Material Technology of Ministry of Education, Hangzhou Normal University, Hangzhou 311121, P. R. China. Fax: 862886 5135; Tel: 86 2886 5135

## Table of Contents

|                                                                 |    |
|-----------------------------------------------------------------|----|
| 1. General Information.....                                     | 3  |
| 2. General Procedure.....                                       | 3  |
| 3. Gram-Scale Preparation of 3a.....                            | 8  |
| 4. Procedure and analytical data for the derivatives of 3a..... | 8  |
| 5. Procedure for 6.....                                         | 10 |
| 6. Procedure for 7.....                                         | 10 |
| 7. Procedure for 8.....                                         | 11 |
| 8. References.....                                              | 11 |
| 9. Copies of NMR Spectra.....                                   | 12 |
| 10. LC-MS spectra of formation of 3a.....                       | 48 |

## S-1. General Information

Reagents were purchased from commercial sources and were used as received unless mentioned otherwise. Reactions were monitored by thin layer chromatography using silica gel.  $^1\text{H}$  NMR was recorded at 300 MHz and 400 MHz: chemical shifts are reported in ppm relative to tetramethylsilane (TMS) with the solvent resonance employed as the internal standard (DMSO- $d_6$  at 2.50).  $^{13}\text{C}$  NMR was recorded at 75 MHz and 100 MHz: chemical shifts are reported in ppm relative to tetramethylsilane (TMS) with the solvent resonance employed as the internal standard (DMSO- $d_6$  at 39.52). High-resolution mass spectra (HRMS) were recorded by an Agilent instrument with ESI-MS technique. LC-MS was recorded by Shimadzu LCMS-2020, equipped with an ESI ion source in the positive ionization mode.

## S-2. General Procedure

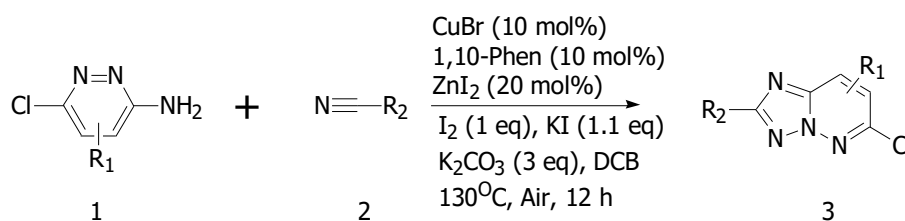

To a dried vial was added 1 (0.77 mmol), 2 (1.93 mmol), CuBr (11.05 mg, 0.077 mmol), 1,10-phenanthroline (13.9mg, 0.077 mmol), ZnI<sub>2</sub> (49.2 mg, 0.154 mmol), I<sub>2</sub> (195.6 mg, 0.77 mmol), KI (141.1 mg, 0.85 mmol) and K<sub>2</sub>CO<sub>3</sub> (319.2 mg, 2.31 mmol). 1,2-Dichlorobenzene (5 ml) was then added. The reaction mixture was stirred at 130 °C for 12 h in pre-heated oil bath. After cooling to room temperature, the reaction was diluted with EtOAc and filtered over glass filter. The filtrate was concentrated and purified by column chromatography on silica gel.

### Characterization of 3a-3n:

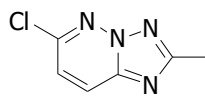

3a

6-Chloro-2-methyl-[1,2,4]triazolo[1,5-b]pyridazine (3a): light yellow solid; 63% yield;  $^1\text{H}$  NMR (300 MHz, DMSO- $d_6$ )  $\delta$  = 8.42 (d,  $J$  = 9.0 Hz, 1H), 7.80 (d,  $J$  = 9.0 Hz, 1H), 2.54 (s, 3H).  $^{13}\text{C}$  NMR (75 MHz, DMSO- $d_6$ )  $\delta$  = 162.8, 146.3, 144.3, 127.2, 125.1, 14.9. LC/MS: 100% purity,  $[\text{M}+\text{H}]^+$  = 169. HR-MS calcd for  $\text{C}_6\text{H}_6\text{ClN}_4$   $[\text{M}+\text{H}]^+$ : 169.0279. found: 169.0281.

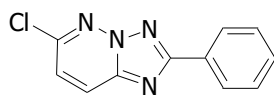

3b

6-Chloro-2-phenyl-[1,2,4]triazolo[1,5-b]pyridazine (3b): light yellow solid; 63% yield;  $^1\text{H}$  NMR (300 MHz, DMSO- $d_6$ )  $\delta$  = 8.55 (d,  $J$  = 9.0 Hz, 1H), 8.23-8.20 (m, 2H), 7.86 (d,  $J$  = 9.0 Hz, 1H), 7.61-7.55 (m, 3H).  $^{13}\text{C}$  NMR (75 MHz, DMSO- $d_6$ )  $\delta$  = 162.3, 146.9, 145.1, 131.1, 130.2, 129.5, 127.8, 127.2, 125.7. LC/MS: 99.2% purity,  $[\text{M}+\text{H}]^+$  = 231. HR-MS calcd for  $\text{C}_{11}\text{H}_8\text{ClN}_4$   $[\text{M}+\text{H}]^+$ : 231.0438. found: 231.0437.

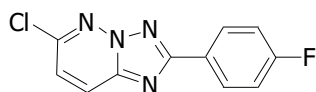

3c

6-Chloro-2-(4-fluoro-phenyl)-[1,2,4]triazolo[1,5-b]pyridazine (3c): light yellow solid; 52% yield;  $^1\text{H}$  NMR (300 MHz, DMSO- $d_6$ )  $\delta$  = 8.54 (d,  $J$  = 9.0 Hz, 1H), 8.26-8.20 (m, 2H), 7.87 (d,  $J$  = 12.0 Hz, 1H), 7.43-7.37 (m, 2H).  $^{13}\text{C}$  NMR (75 MHz, DMSO- $d_6$ )  $\delta$  = 165.7, 162.4, 161.4, 147.0, 145.2, 129.6 (d,  $J$  = 9.0 Hz), 127.8, 126.8 (d,  $J$  = 3.0 Hz), 125.8, 116.7 (d,  $J$  = 21.7 Hz).  $^{19}\text{F}$  (282 MHz, DMSO- $d_6$ )  $\delta$  = -109.9. LC/MS: 99.4% purity,  $[\text{M}+\text{H}]^+$  = 249. HR-MS calcd for  $\text{C}_{11}\text{H}_7\text{ClFN}_4$   $[\text{M}+\text{H}]^+$ : 249.0345. found: 249.0343.

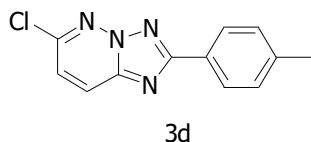

6-Chloro-2-p-tolyl-[1,2,4]triazolo[1,5-b]pyridazine (3d): light yellow solid; 36% yield;  $^1\text{H}$  NMR (400 MHz, DMSO- $d_6$ )  $\delta$  = 8.56-8.53 (m, 1H), 8.15-8.12 (m, 2H), 7.89-7.83 (m, 1H), 7.40 (d,  $J$  = 8.0 Hz, 2H), 2.42 (s, 3H).  $^{13}\text{C}$  NMR (100 MHz, DMSO- $d_6$ )  $\delta$  = 162.4, 146.7, 145.1, 141.0, 130.1, 127.7, 127.4, 127.1, 125.6, 117.5, 21.5. LC/MS: 99.1% purity,  $[\text{M}+\text{H}]^+$  = 245. HR-MS calcd for  $\text{C}_{12}\text{H}_{10}\text{ClN}_4$   $[\text{M}+\text{H}]^+$ : 245.0601. found: 245.0594.

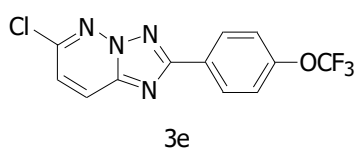

6-Chloro-2-(4-trifluoromethoxy-phenyl)-[1,2,4]triazolo[1,5-b]pyridazine (3e): light yellow solid; 18% yield;  $^1\text{H}$  NMR (400 MHz, DMSO- $d_6$ )  $\delta$  = 8.62-8.59 (m, 1H), 8.25-8.21 (m, 1H), 7.93-7.90 (m, 1H), 7.67-7.61 (m, 1H), 7.49-7.42 (m, 2H).  $^{13}\text{C}$  NMR (100 MHz, DMSO- $d_6$ )  $\delta$  = 161.07, 150.39, 147.2, 145.3, 129.4 (d,  $J$  = 11.0 Hz), 128.0, 126.0, 122.0. LC/MS: 98.1% purity,  $[\text{M}+\text{H}]^+$  = 315. HR-MS calcd for  $\text{C}_{12}\text{H}_7\text{ClF}_3\text{N}_4\text{O}$   $[\text{M}+\text{H}]^+$ : 315.0268. found: 315.026.

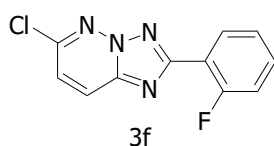

6-Chloro-2-(2-fluoro-phenyl)-[1,2,4]triazolo[1,5-b]pyridazine (3f): light yellow solid; 34% yield;  $^1\text{H}$  NMR (400 MHz, DMSO- $d_6$ )  $\delta$  = 8.61-8.58 (m, 1H), 8.38-8.35 (m, 2H), 7.93-7.90 (m, 1H), 7.60 (d,  $J$  = 8.0 Hz, 2H).  $^{13}\text{C}$  NMR (100 MHz, DMSO- $d_6$ )  $\delta$  = 161.7, 159.1-158.9 (t,  $J$  = 19.0 Hz, 5.0 Hz), 147.3, 144.5, 133.0 (d,  $J$  = 8.0 Hz), 130.8 (d,  $J$  = 2.0 Hz), 128.0, 126.0, 125.4 (d,  $J$  = 4.0 Hz), 118.1 (d,  $J$  = 11.0 Hz), 117.3 (d,  $J$  = 21.0 Hz). LC/MS: 97.5% purity,  $[\text{M}+\text{H}]^+$  = 249. HR-MS calcd for  $\text{C}_{11}\text{H}_7\text{ClFN}_4$   $[\text{M}+\text{H}]^+$ : 249.0346. found: 249.0343.

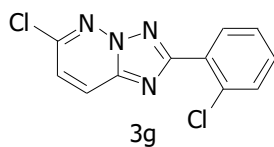

6-Chloro-2-(2-chloro-phenyl)-[1,2,4]triazolo[1,5-b]pyridazine (3g):

light yellow solid; 22% yield;  $^1\text{H}$  NMR (400 MHz, DMSO- $d_6$ )  $\delta$  = 8.65-8.62 (m, 1H), 8.07 (d,  $J$  = 4.0 Hz, 2H), 8.04 (d,  $J$  = 8.0 Hz, 1H), 7.95-7.92 (m, 1H), 7.71-7.55 (m, 2H).  $^{13}\text{C}$  NMR (100 MHz, DMSO- $d_6$ )  $\delta$  = 160.9, 147.5, 144.6, 132.4 (d,  $J$  = 7.0 Hz), 132.1, 131.4, 129.2, 128.0 (d,  $J$  = 16.0 Hz), 126.1. LC/MS: 99.2% purity,  $[\text{M}+\text{H}]^+$  = 265.1. HR-MS calcd for  $\text{C}_{11}\text{H}_7\text{Cl}_2\text{N}_4$   $[\text{M}+\text{H}]^+$ : 265.0049. found: 265.0048.

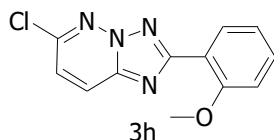

6-Chloro-2-(2-methoxy-phenyl)-[1,2,4]triazolo[1,5-b]pyridazine (3h): light yellow solid; 22% yield;  $^1\text{H}$  NMR (300 MHz, DMSO- $d_6$ )  $\delta$  = 8.52-8.49 (t,  $J$  = 6.0 Hz, 3.0 Hz, 1H), 7.97-7.90 (m, 1H), 7.83 (d,  $J$  = 9.0 Hz, 1H), 7.53-7.47 (m, 1H), 7.22-7.12 (t,  $J$  = 9.0 Hz, 21 Hz, 1H), 7.09-7.07 (t,  $J$  = 6.0 Hz, 1H), 3.85 (s, 3H).  $^{13}\text{C}$  NMR (75 MHz, DMSO- $d_6$ )  $\delta$  = 161.3, 158.1, 146.7, 144.0, 132.2, 131.3, 127.6, 125.4, 120.9, 119.3, 112.9, 56.2. LC/MS: 90.2% purity,  $[\text{M}+\text{H}]^+$  = 261. HR-MS calcd for  $\text{C}_{12}\text{H}_{10}\text{ClN}_4\text{O}$   $[\text{M}+\text{H}]^+$ : 261.0548. found: 261.0543.

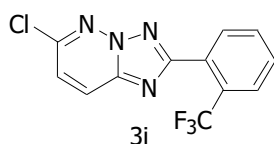

6-Chloro-2-(2-(trifluoromethyl)phenyl)-[1,2,4]triazolo[1,5-b]pyridazine (3i): light yellow solid; 39% yield;  $^1\text{H}$  NMR (400 MHz, DMSO- $d_6$ )  $\delta$  = 8.61-8.59 (m, 1H), 7.98-7.94 (m, 2H), 7.93 (d,  $J$  = 12.0 Hz, 1H), 7.88-7.80 (m, 1H), 7.79-7.75 (m, 1H).  $^{13}\text{C}$  NMR (100 MHz, DMSO- $d_6$ )  $\delta$  = 161.4, 147.7, 144.4, 133.1 (d,  $J$  = 23.0 Hz), 131.1, 129.5 (d,  $J$  = 3.0 Hz), 128.2, 127.9, 127.4-127.2 (m), 126.2, 125.5, 122.8.  $^{19}\text{F}$  (376 MHz, DMSO- $d_6$ )  $\delta$  = -56.9. LC/MS: 97.5% purity,  $[\text{M}+\text{H}]^+$  = 299. HR-MS calcd for  $\text{C}_{12}\text{H}_7\text{ClF}_3\text{N}_4$   $[\text{M}+\text{H}]^+$ : 299.0315. found: 299.0311.

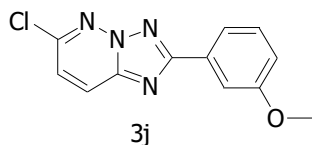

6-Chloro-2-(3-methoxy-phenyl)-[1,2,4]triazolo[1,5-b]pyridazine (3j): light yellow solid; 27% yield;  $^1\text{H}$  NMR (400 MHz, DMSO- $d_6$ )  $\delta$  = 8.46 (d,  $J$  = 8.0 Hz, 1H), 7.79-7.73 (m, 2H),

7.66-7.64 (m, 1H), 7.44 (d,  $J = 8.0$  Hz, 1H), 7.09-7.06 (m, 1H), 3.83 (s, 3H);  $^{13}\text{C}$  NMR (100 MHz, DMSO- $d_6$ )  $\delta = 162.1, 160.0, 147.0, 145.0, 131.4, 130.7, 127.7, 125.7, 119.5, 117.0, 112.0, 55.6$ . LC/MS: 98.9% purity,  $[\text{M}+\text{H}]^+ = 261$ . HR-MS calcd for  $\text{C}_{12}\text{H}_{10}\text{ClN}_4\text{O}$   $[\text{M}+\text{H}]^+$ : 261.0551. found: 261.0543.

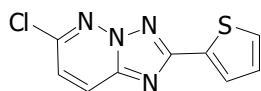

3k

6-Chloro-2-(Thiophen-2-yl)-[1,2,4]triazolo[1,5-b]pyridazine (3k): light yellow solid; 30% yield;  $^1\text{H}$  NMR (400 MHz, DMSO- $d_6$ )  $\delta = 8.48$  (d,  $J = 12.0$  Hz, 1H), 7.86-7.79 (m, 3H), 7.25-7.22 (m, 1H).  $^{13}\text{C}$  NMR (100 MHz, DMSO- $d_6$ )  $\delta = 158.6, 146.8, 145.0, 132.9, 130.1, 129.0$  (d,  $J = 26.0$  Hz), 127.4, 125.9. LC/MS: 89.7% purity,  $[\text{M}+\text{H}]^+ = 237.1$ . HR-MS calcd for  $\text{C}_9\text{H}_6\text{ClN}_4\text{S}$   $[\text{M}+\text{H}]^+$ : 237.0014. found: 237.0002.

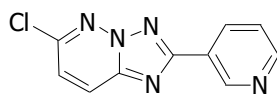

3l

6-Chloro-2-(Pyridin-4-yl)-[1,2,4]triazolo[1,5-b]pyridazine (3l): light yellow solid; 39% yield;  $^1\text{H}$  NMR (400 MHz, DMSO- $d_6$ )  $\delta = 9.33$  (s, 1H), 8.73-8.72 (m, 1H), 8.57-8.48 (m, 2H), 7.89 (d,  $J = 12.0$  Hz, 1H), 7.62-7.57 (m, 1H).  $^{13}\text{C}$  NMR (100 MHz, DMSO- $d_6$ )  $\delta = 160.2, 151.9, 148.1, 147.4, 145.2, 134.6, 128.0, 126.2$  (d,  $J = 8.4$  Hz), 124.6. LC/MS: 99.3% purity,  $[\text{M}+\text{H}]^+ = 232$ . HR-MS calcd for  $\text{C}_{10}\text{H}_7\text{ClN}_5$   $[\text{M}+\text{H}]^+$ : 232.0389. found: 232.039.

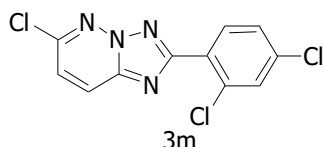

3m

6-Chloro-2-(2,4-dichlorophenyl)-[1,2,4]triazolo[1,5-b]pyridazine (3m): light yellow solid; 22% yield;  $^1\text{H}$  NMR (300 MHz, DMSO- $d_6$ )  $\delta = 8.59$  (d,  $J = 9.0$  Hz, 1H), 8.08 (d,  $J = 9.0$  Hz, 1H), 7.89-7.81 (m, 2H), 7.62-7.59 (m, 1H).  $^{13}\text{C}$  NMR (75 MHz, DMSO- $d_6$ )  $\delta = 160.0, 147.6, 144.3, 136.0, 133.5$  (d,  $J = 6.7$  Hz), 130.9, 128.2 (t,  $J = 8.2$  Hz, 2.2 Hz), 126.1. LC/MS: 87.8% purity,  $[\text{M}+\text{H}]^+ = 299$ . HR-MS calcd for  $\text{C}_{11}\text{H}_6\text{Cl}_3\text{N}_4$   $[\text{M}+\text{H}]^+$ : 298.9655. found: 298.9655.

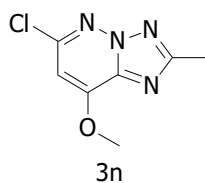

6-Chloro-8-methoxy-2-methyl-[1,2,4]triazolo[1,5-b]pyridazine (**3n**): light yellow solid; 33% yield;  $^1\text{H}$  NMR (400 MHz, DMSO- $d_6$ )  $\delta$  = 7.28 (s, 1H), 4.09 (s, 3H), 2.46 (s, 3H).  $^{13}\text{C}$  NMR (100 MHz, DMSO- $d_6$ )  $\delta$  = 161.1, 155.5, 147.2, 139.8, 103.5, 58.4, 14.7. LC/MS: 100% purity,  $[\text{M}+\text{H}]^+ = 199$ . HR-MS calcd for  $\text{C}_7\text{H}_8\text{ClN}_4\text{O}$   $[\text{M}+\text{H}]^+$ : 199.0387. found: 199.0387.

### S-3. Gram-Scale Preparation of **3a**

6-Chloro-2-methyl-[1,2,4]triazolo[1,5-b]pyridazine (**3a**): under the standard conditions described above, **1a** (2.0 g, 15.4 mmol), **2a** (100 ml), CuBr (220.9 mg, 1.54 mmol), 1,10-phenanthroline (277.5 mg, 1.54 mmol),  $\text{ZnI}_2$  (983.1 mg, 3.08 mmol),  $\text{I}_2$  (3.9 g, 15.4 mmol), KI (2.8 g, 16.9 mmol) and  $\text{K}_2\text{CO}_3$  (6.4 g, 46.2 mmol), in 1,2-Dichlorobenzene (20 ml), afforded **3a** (1.95 g, 75% yield) as a light yellow solid.

### S-4. Procedure and analytical data for the derivatives of **3a**

#### 1. Synthesis of **4a**

To a 25 ml round bottom Schlenk was added **3a** (100 mg, 0.59 mmol), phenylboronic acid (108.3 mg, 0.89 mmol),  $\text{Pd}(\text{PPh}_3)_2\text{Cl}_2$  (41.4 mg, 0.059 mmol),  $\text{Na}_2\text{CO}_3$  (187.6 mg, 1.77 mmol), dioxane (8 ml),  $\text{H}_2\text{O}$  (2 ml). The reaction vessel was vacuumed and backfilled with  $\text{N}_2$  (3 times). The reaction mixture was heated at 80  $^\circ\text{C}$  overnight. The reaction was cooled to r.t., diluted with  $\text{H}_2\text{O}$  and extracted with EtOAc. The combined organic layers were dried over sodium sulfate, filtered and concentrated. The residue was purified by silica gel flash chromatography.



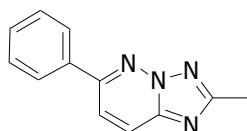

4a

2-Methyl-6-phenyl-[1,2,4]triazolo[1,5-b]pyridazine (4a): light yellow solid; 68% yield;  $^1\text{H}$  NMR (300 MHz, DMSO- $d_6$ )  $\delta$  = 8.36 (d,  $J$  = 12.0 Hz, 1H), 8.16-8.13 (t,  $J$  = 6.0 Hz, 3.0 Hz, 1H), 8.08-8.03 (m, 2H), 7.57-7.53 (m, 3H), 2.52 (s, 3H).  $^{13}\text{C}$  NMR (75 MHz, DMSO- $d_6$ )  $\delta$  = 162.6, 151.4, 144.3, 134.7, 131.9 (d,  $J$  = 9.7 Hz), 130.8, 129.5, 129.2 (d,  $J$  = 11.2 Hz), 127.4, 125.4, 121.8, 14.9. LC/MS: 98.7% purity,  $[\text{M}+\text{H}]^+$  = 211. HR-MS calcd for  $\text{C}_{12}\text{H}_{11}\text{N}_4$   $[\text{M}+\text{H}]^+$ : 211.0988. found: 211.0984.

## 2. Synthesis of 4b

To a 25 ml round bottom Schlenk was added **3a** (100 mg, 0.59 mmol), arylethyne (125.6 mg, 0.89 mmol), Pd(OAc) $_2$  (13.2 mg, 0.059 mmol), RuPhos (55.0 mg, 0.118 mmol), Et $_3$ N (179.1 mg, 1.77 mmol), CH $_3$ CN (10 ml). The reaction vessel was vacuumed and backfilled with N $_2$  (3 times). The reaction mixture was heated at 80 °C overnight. The reaction was cooled to r.t., diluted with H $_2$ O and extracted with EtOAc. The combined organic layers were dried over sodium sulfate, filtered and concentrated. The residue was purified by silica gel flash chromatography.

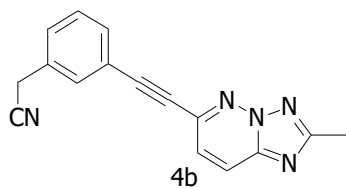

[3-(2-Methyl-[1,2,4]triazolo[1,5-b]pyridazin-6-ylethynyl)-phenyl]-acetonitrile (4b): light yellow solid; 59% yield;  $^1\text{H}$  NMR (300 MHz, DMSO- $d_6$ )  $\delta$  = 8.35 (d,  $J$  = 9.0 Hz, 1H), 7.82-7.76 (t,  $J$  = 9.0 Hz, 9.0 Hz, 1H), 7.66-7.62 (m, 2H), 7.54-7.47 (m, 2H), 4.10 (s, 2H), 2.53 (s, 3H).  $^{13}\text{C}$  NMR (75 MHz, DMSO- $d_6$ )  $\delta$  = 163.4, 144.4, 137.7, 132.8, 131.9 (d,  $J$  = 21.0 Hz), 130.4 (d,  $J$  = 26.2 Hz), 126.4, 125.3, 121.2, 119.2, 92.1, 85.3, 22.5, 14.9. LC/MS: 99.6% purity,  $[\text{M}+\text{H}]^+$  = 274. HR-MS calcd for  $\text{C}_{16}\text{H}_{12}\text{N}_5$   $[\text{M}+\text{H}]^+$ : 274.1093. found: 274.1093.

## S-5. Procedure for 6

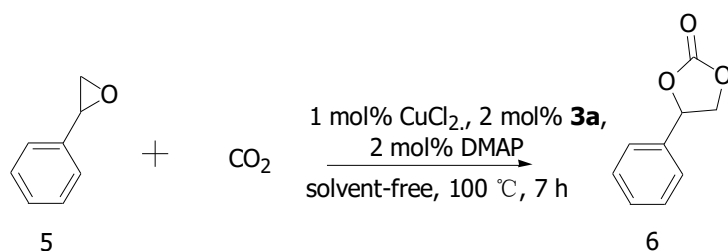

$\text{CO}_2$  (g) from a gas balloon was allowed to react with **5** (500mg, 4.16 mmol),  $\text{CuCl}_2$  (5.6 mg, 0.04 mmol), **3a** (13.5 mg, 0.08 mmol), DMAP (9.8 mg, 0.08 mmol) at 100 °C for 7 h in pre-heated oil bath. GC-MS of the crude reaction mixture in EtOAc showed 82% conversion of the starting epoxide to the desired product **6**.

## S-6. Procedure for 7

To an oven dried Schlenk tube were added oxazoline (389 mg, 2.4 mmol),  $\text{Pd}(\text{OAc})_2$  (44.5 mg, 0.2 mmol), dppe (96 mg, 0.24 mmol) and  $\text{LiOtBu}$  (320 mg, 4.0 mmol) under  $\text{N}_2$ . The tube was degassed with  $\text{N}_2$  three times and addition of **3a** (340 mg, 2 mmol) to the reaction vessel was followed by the addition of anhydrous Dioxane (5 ml). The reaction mixture was stirred in an oil bath at 100 °C for 12h, and then cooled to room temperature, diluted with  $\text{H}_2\text{O}$  and extracted with EtOAc. The combined organic layers were dried over sodium sulfate, filtered and concentrated. The residue was purified by silica gel flash chromatography.

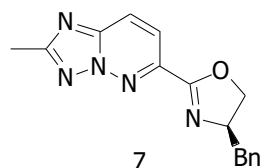

6-(4-Benzyl-4,5-dihydro-oxazol-2-yl)-2-methyl-1,2,4-triazolo[1,5-b]pyridazine (**7**): light yellow solid; 70% yield;  $^1\text{H}$  NMR (400 MHz,  $\text{CDCl}_3$ )  $\delta$  = 8.06 (d,  $J$  = 12.0 Hz, 1H), 7.99 (d,  $J$  = 12.0 Hz, 1H), 7.21-7.18 (m, 5H), 4.65-4.61 (m, 1H), 4.50-4.45 (t,  $J$  = 12.0 Hz, 8 Hz, 1H), 4.26-4.22 (t,  $J$  = 8.0 Hz, 8 Hz, 1H), 3.19-3.14 (m, 1H), 2.78-2.73 (m, 1H), 2.62 (s, 3H).  $^{13}\text{C}$  NMR (100 MHz,  $\text{CDCl}_3$ )  $\delta$  = 164.6, 160.4, 145.2, 141.5, 137.2, 129.2, 128.6, 126.7, 124.0, 122.2, 73.0, 68.1, 41.4, 15.0. HR-MS calcd for  $\text{C}_{16}\text{H}_{15}\text{N}_5\text{NaO}$   $[\text{M}+\text{Na}]^+$ : 316.1169. found: 316.1160.

## S-7. Procedure for 8

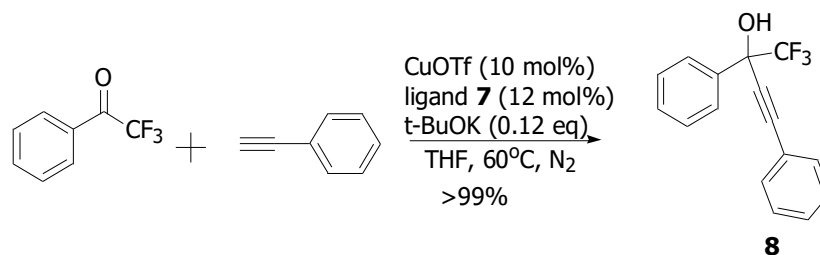

To a CuOTf • 1/2benzene (10 mol%), KOtBu (0.12 eq) and ligand **7** (12 mol%) in THF (2 ml) under N<sub>2</sub>, trifluoroacetophenone (1 eq) and alkyne (2 eq) were added at room temperature. The mixture was warmed up to 60 °C. After 12 h, the reaction mixture was diluted with AcOEt, and SiO<sub>2</sub> was added. Filtration, removal of the solvent gave crude product as brown oil. GC-MS of the crude reaction mixture in EtOAc showed 99% conversion of the starting trifluoroacetophenone to the desired product **8**.

## S-8. References

1. For synthesis of 3a, 3b, please see: Y. Tamura, J. H. Kim, M. Ikeda, *J. Heterocyclic. Chem.* **1975**, 12, 107-108.
2. For synthesis of 6, please see: A. Kilic, A. A. Palali, M. Durgun, Z. Tasci, M. Ulusoy, *Spectrochimica Acta Part A: Molecular and Biomolecular Spectroscopy*. **2013**, 113, 432-438.

## S-9. NMR Spectra

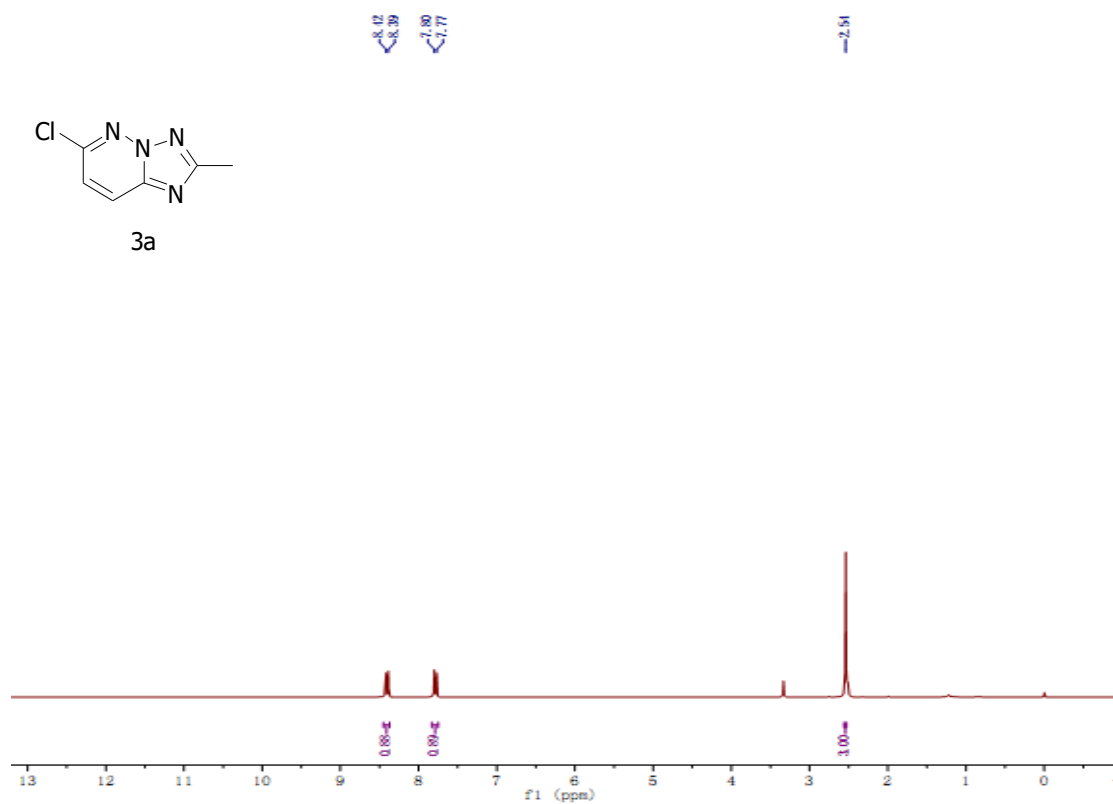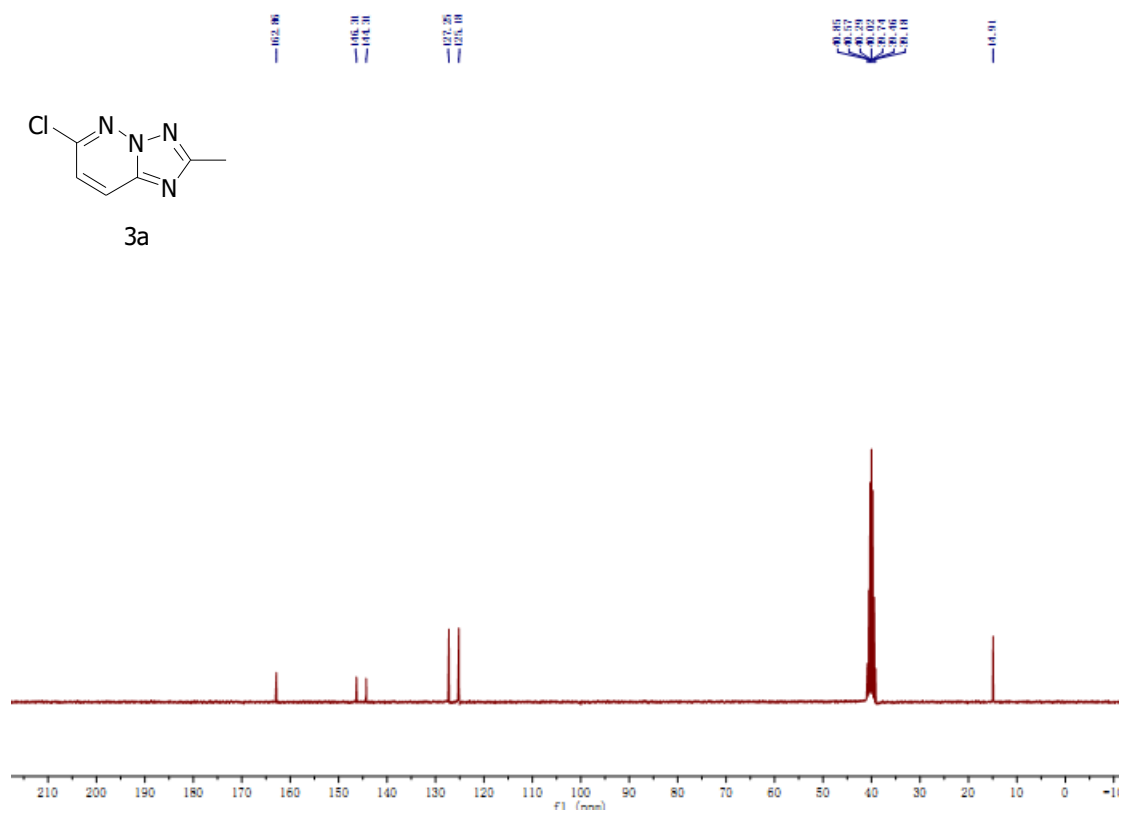

mAU

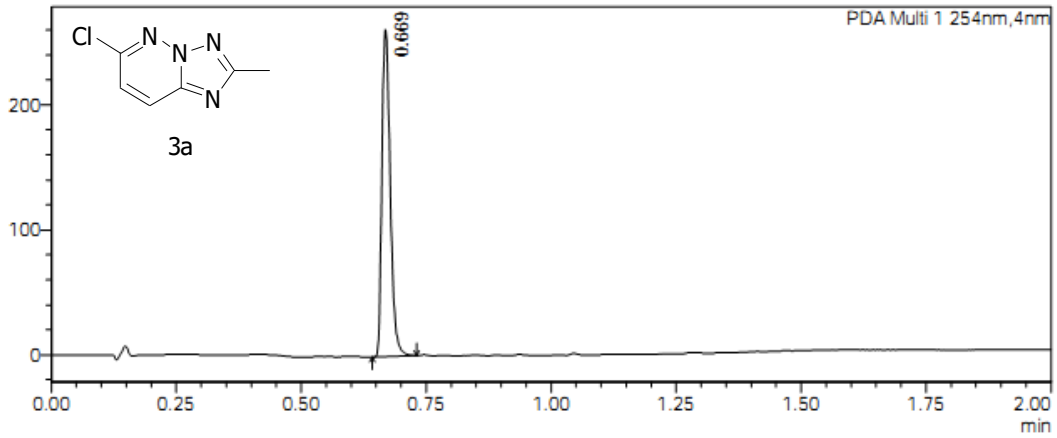

Peak Table

PDA Ch1 254nm

| Peak# | Ret. Time | Height | Height% | Area   | Area%   |
|-------|-----------|--------|---------|--------|---------|
| 1     | 0.669     | 261613 | 100.000 | 303476 | 100.000 |
| Total |           | 261613 | 100.000 | 303476 | 100.000 |

Mass Spectrum

Line#:1 R.Time:0.665(Scan#:90)

MassPeaks:394

Spectrum Mode:Averaged 0.656-0.673(89-91) BasePeak:169(753680)

BG Mode:Calc Segment 1 - Event 1

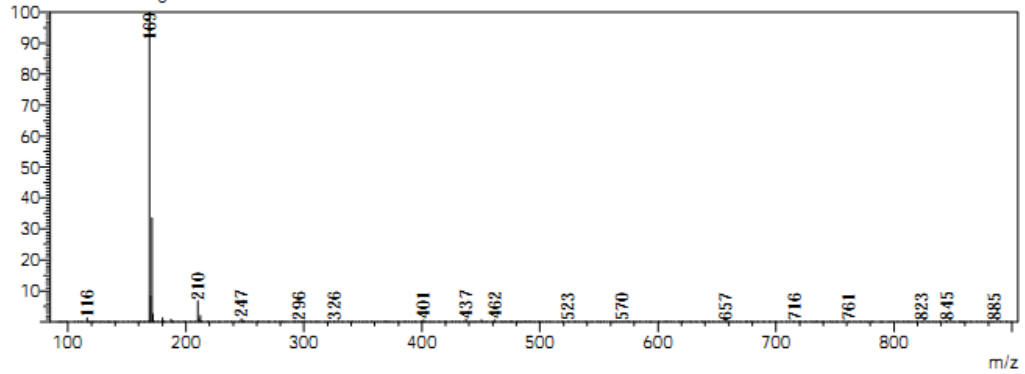

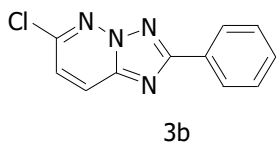

8.55  
8.52  
8.27  
8.27  
8.21  
8.21  
8.20  
7.85  
7.83  
7.61  
7.59  
7.58  
7.58  
7.56  
7.55

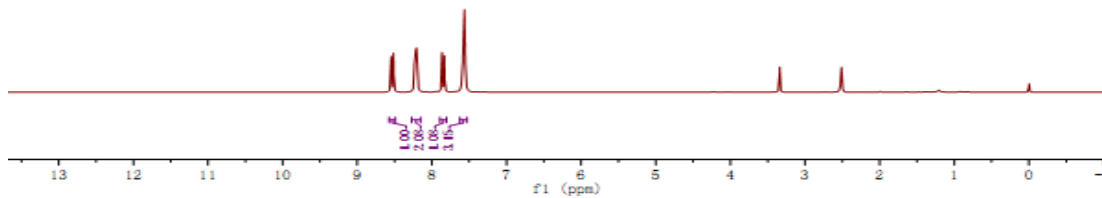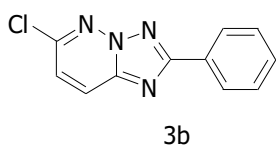

162.31  
146.95  
146.47  
131.88  
130.23  
127.82  
127.22  
126.76

41.82  
41.30  
40.07  
39.16  
38.88

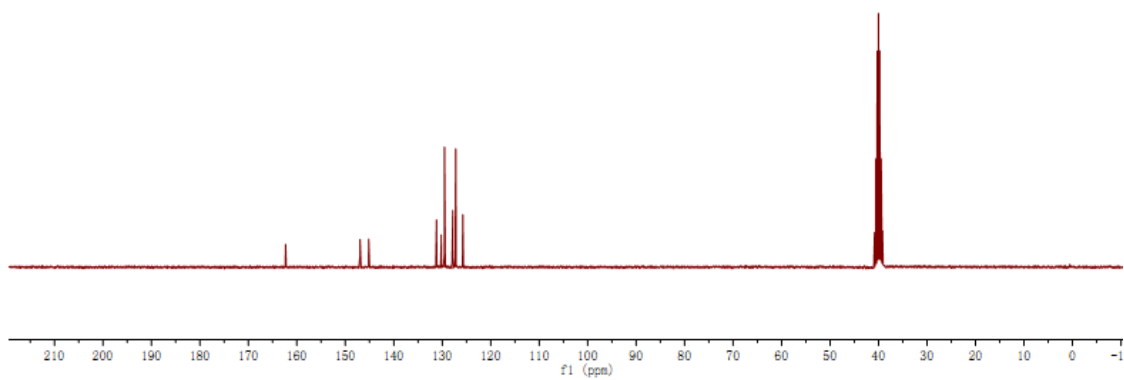

mAU

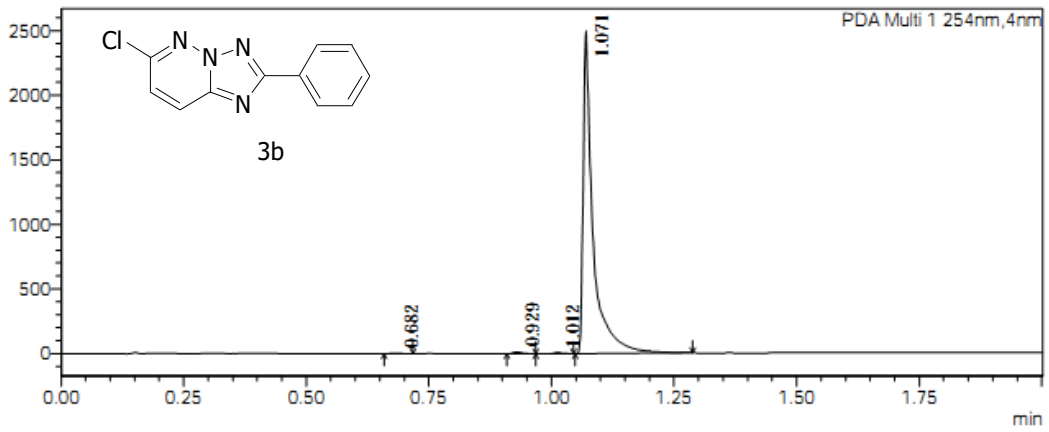

Peak Table

PDA Ch1 254nm

| Peak# | Ret. Time | Height  | Height% | Area    | Area%   |
|-------|-----------|---------|---------|---------|---------|
| 1     | 0.682     | 4363    | 0.178   | 6757    | 0.194   |
| 2     | 0.929     | 12435   | 0.508   | 13806   | 0.397   |
| 3     | 1.012     | 6764    | 0.277   | 7095    | 0.204   |
| 4     | 1.071     | 2421983 | 99.037  | 3450859 | 99.205  |
| Total |           | 2445545 | 100.000 | 3478517 | 100.000 |

Line#:2 R.Time:1.081(Scan#:140)

MassPeaks:630

Spectrum Mode:Single 1.081(140) BasePeak:231(1674587)

BG Mode:None Segment 1 - Event 1

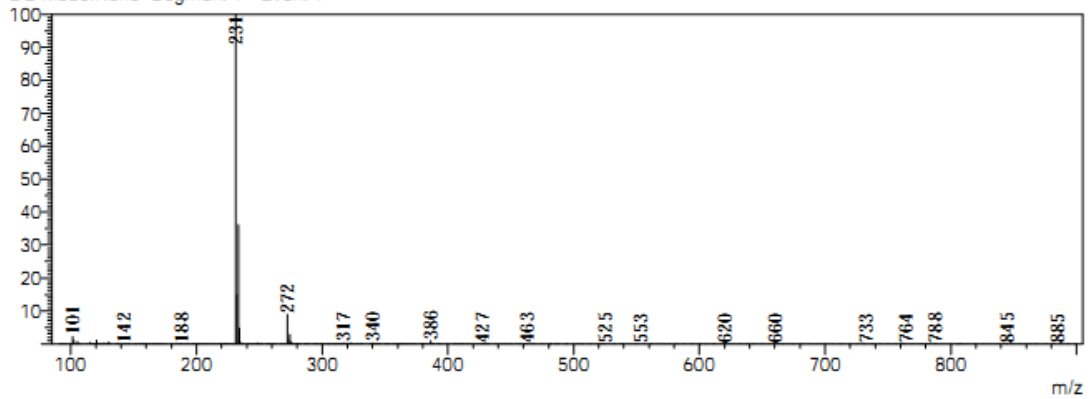

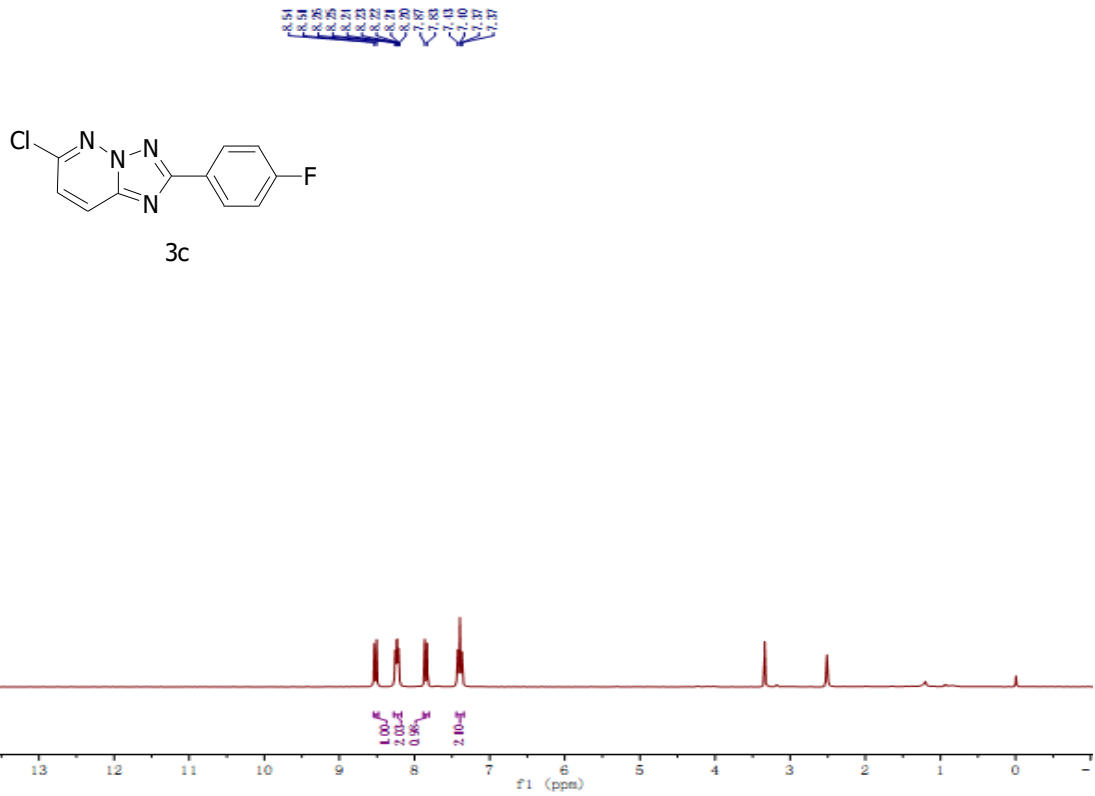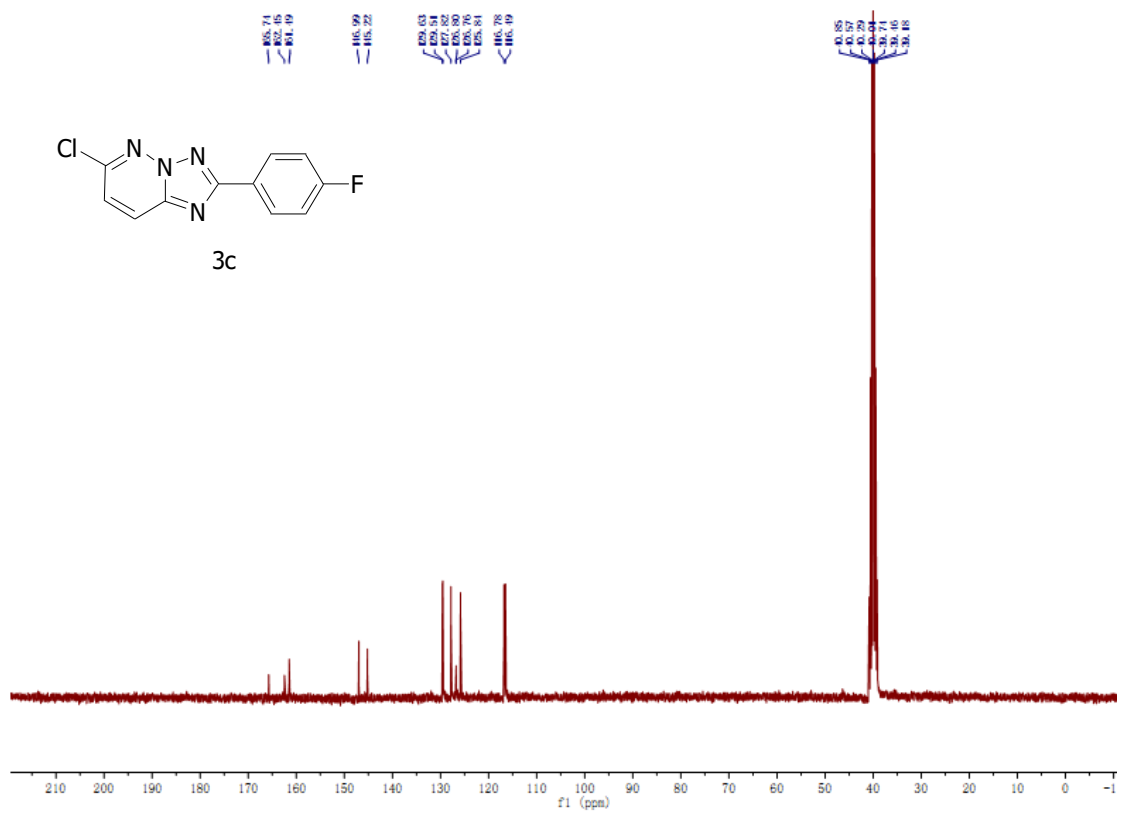



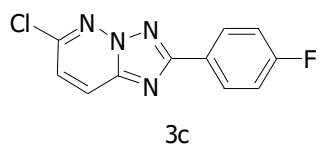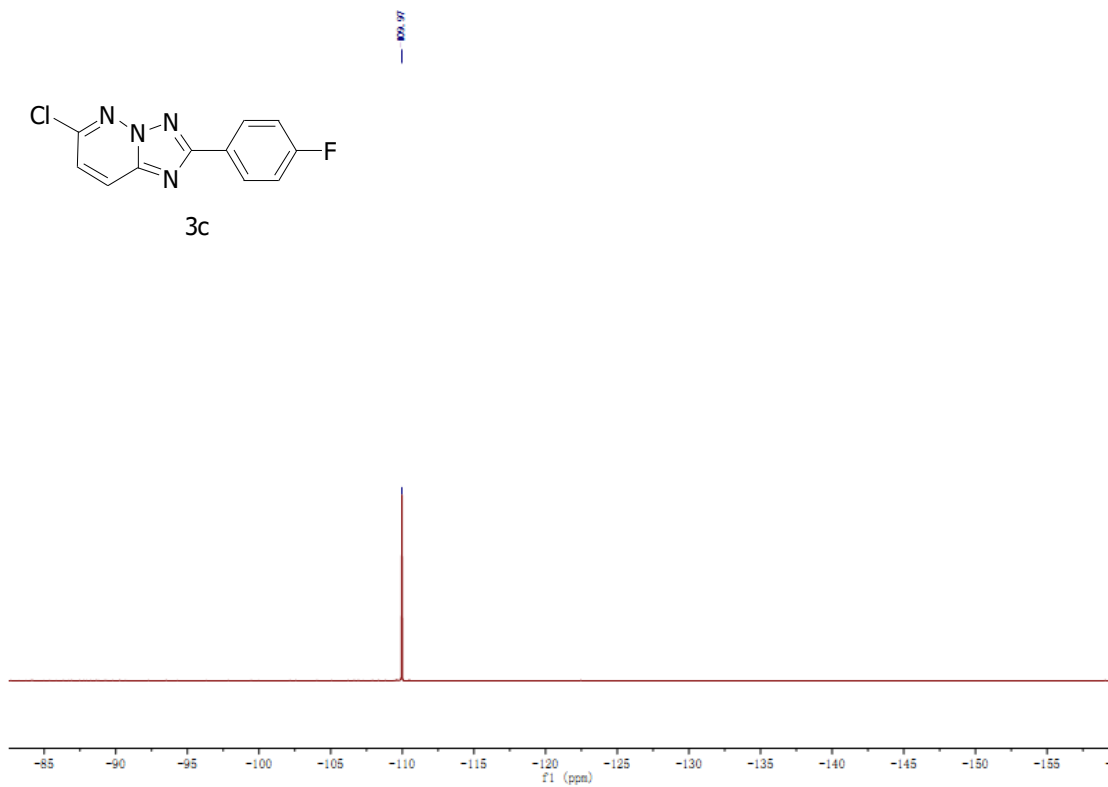

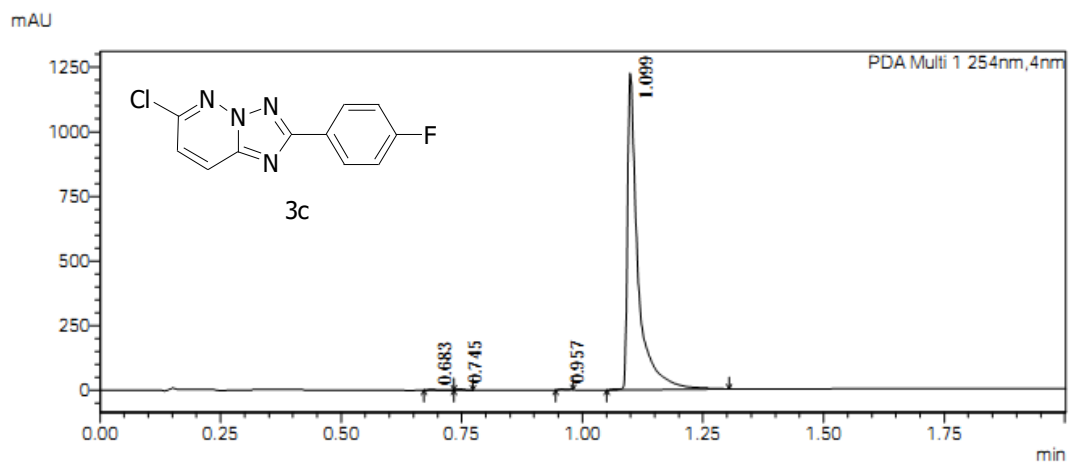

Peak Table

| Peak# | Ret. Time | Height  | Height% | Area    | Area%   |
|-------|-----------|---------|---------|---------|---------|
| 1     | 0.683     | 2180    | 0.180   | 3309    | 0.178   |
| 2     | 0.745     | 4976    | 0.411   | 4806    | 0.258   |
| 3     | 0.957     | 2713    | 0.224   | 2547    | 0.137   |
| 4     | 1.099     | 1200069 | 99.184  | 1849859 | 99.427  |
| Total |           | 1209937 | 100.000 | 1860521 | 100.000 |

Line#:1 R.Time:1.098(Scan#:142)  
 MassPeaks:434  
 Spectrum Mode:Averaged 1.090-1.106(141-143) BasePeak:249(620070)  
 BG Mode:Calc Segment 1 - Event 1

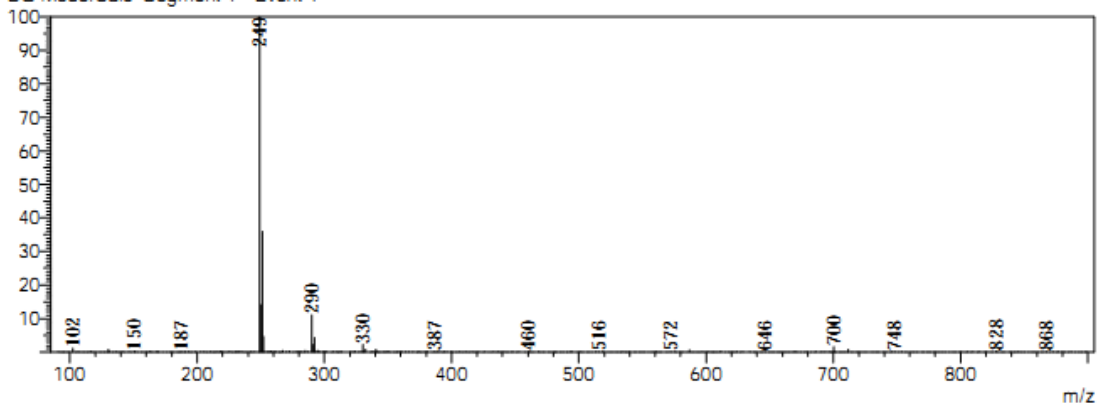

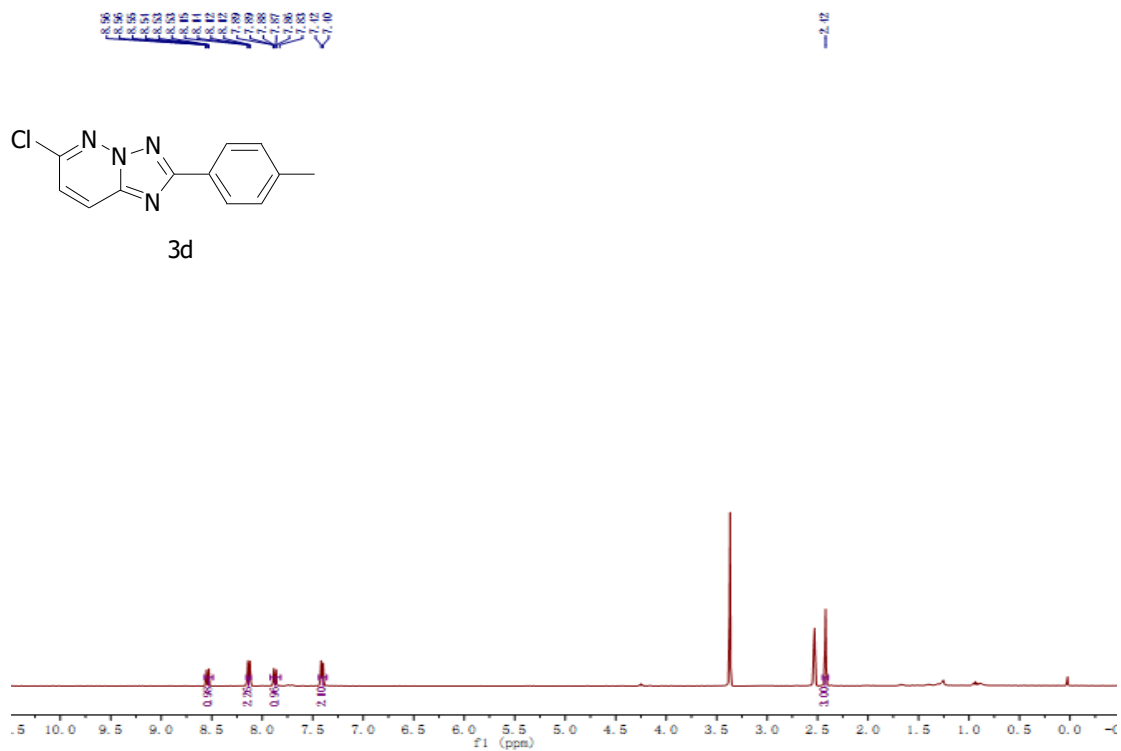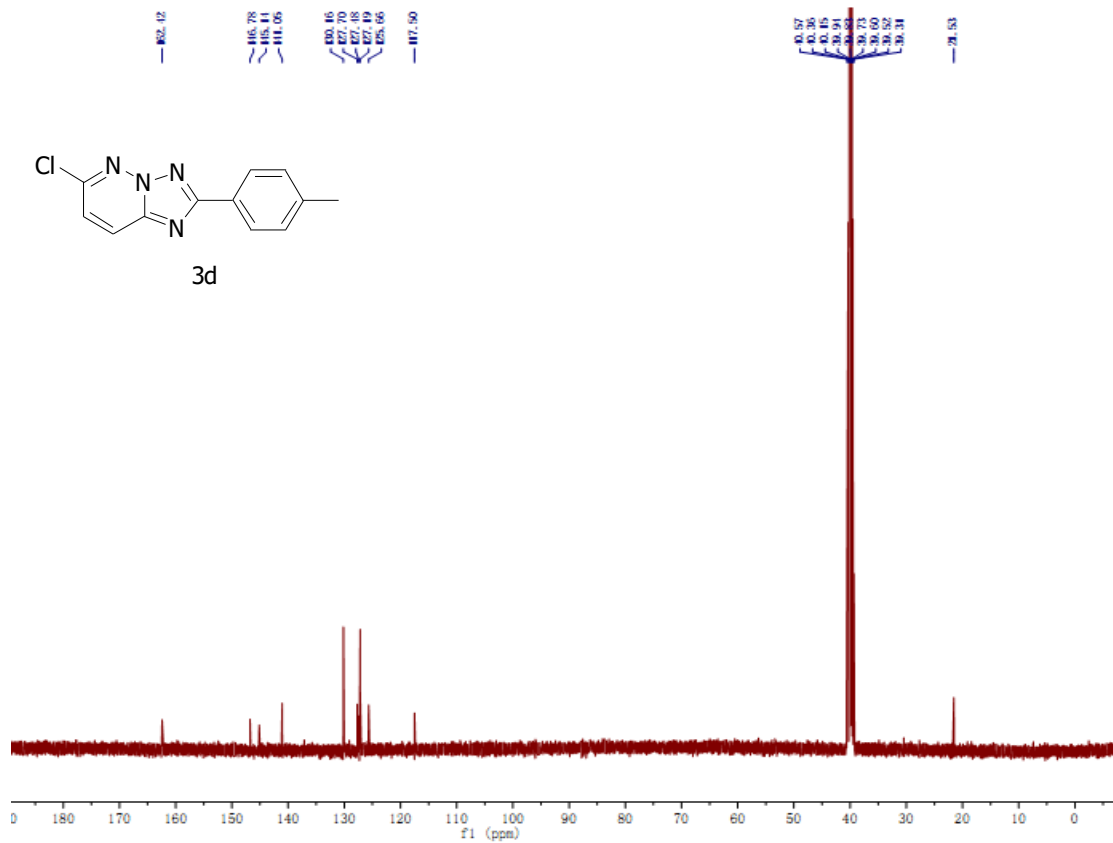

mAU

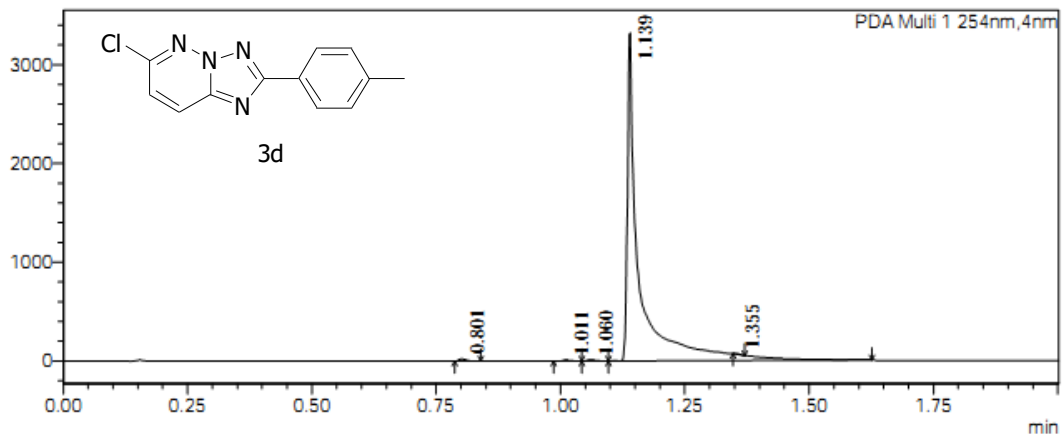

Peak Table

PDA Ch1 254nm

| Peak# | Ret. Time | Height  | Height% | Area    | Area%   |
|-------|-----------|---------|---------|---------|---------|
| 1     | 0.801     | 21350   | 0.671   | 20146   | 0.365   |
| 2     | 1.011     | 9224    | 0.290   | 9805    | 0.178   |
| 3     | 1.060     | 11386   | 0.358   | 12799   | 0.232   |
| 4     | 1.139     | 3131172 | 98.371  | 5468693 | 99.129  |
| 5     | 1.355     | 9901    | 0.311   | 5292    | 0.096   |
| Total |           | 3183033 | 100.000 | 5516735 | 100.000 |

Line#:1 R.Time:1.140(Scan#:147)

MassPeaks:470

Spectrum Mode:Averged 1.131-1.148(146-148) BasePeak:245(1650455)

BG Mode:Calc Segment 1 - Event 1

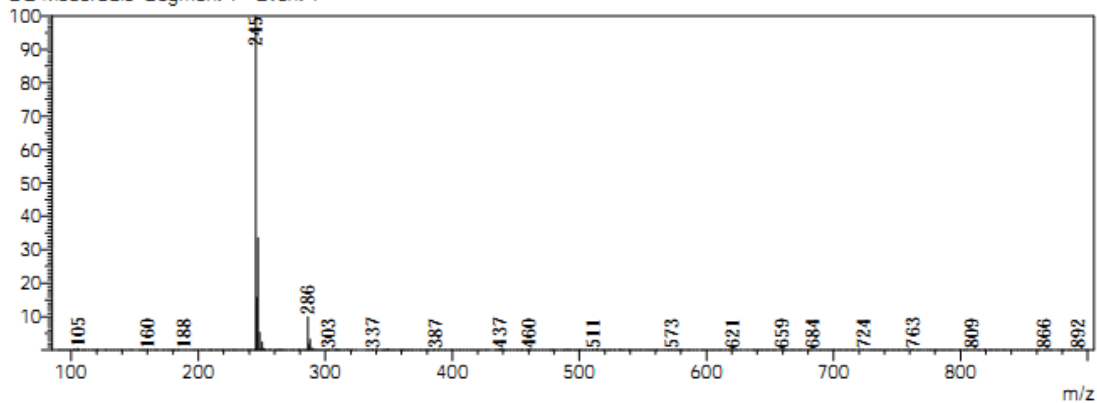

8.41  
8.40  
8.39  
8.38  
8.37  
8.36  
8.35  
8.34  
8.33  
8.32  
8.31  
8.30  
8.29  
8.28  
8.27  
8.26  
8.25  
8.24  
8.23  
8.22  
8.21  
8.20  
8.19  
8.18  
8.17  
8.16  
8.15  
8.14  
8.13  
8.12  
8.11  
8.10  
8.09  
8.08  
8.07  
8.06  
8.05  
8.04  
8.03  
8.02  
8.01  
8.00  
7.99  
7.98  
7.97  
7.96  
7.95  
7.94  
7.93  
7.92  
7.91  
7.90  
7.89  
7.88  
7.87  
7.86  
7.85  
7.84  
7.83  
7.82  
7.81  
7.80  
7.79  
7.78  
7.77  
7.76  
7.75  
7.74  
7.73  
7.72  
7.71  
7.70  
7.69  
7.68  
7.67  
7.66  
7.65  
7.64  
7.63  
7.62  
7.61  
7.60  
7.59  
7.58  
7.57  
7.56  
7.55  
7.54  
7.53  
7.52  
7.51  
7.50  
7.49  
7.48  
7.47  
7.46  
7.45  
7.44  
7.43  
7.42  
7.41  
7.40  
7.39  
7.38  
7.37  
7.36  
7.35  
7.34  
7.33  
7.32  
7.31  
7.30  
7.29  
7.28  
7.27  
7.26  
7.25  
7.24  
7.23  
7.22  
7.21  
7.20  
7.19  
7.18  
7.17  
7.16  
7.15  
7.14  
7.13  
7.12  
7.11  
7.10  
7.09  
7.08  
7.07  
7.06  
7.05  
7.04  
7.03  
7.02  
7.01  
7.00  
6.99  
6.98  
6.97  
6.96  
6.95  
6.94  
6.93  
6.92  
6.91  
6.90  
6.89  
6.88  
6.87  
6.86  
6.85  
6.84  
6.83  
6.82  
6.81  
6.80  
6.79  
6.78  
6.77  
6.76  
6.75  
6.74  
6.73  
6.72  
6.71  
6.70  
6.69  
6.68  
6.67  
6.66  
6.65  
6.64  
6.63  
6.62  
6.61  
6.60  
6.59  
6.58  
6.57  
6.56  
6.55  
6.54  
6.53  
6.52  
6.51  
6.50  
6.49  
6.48  
6.47  
6.46  
6.45  
6.44  
6.43  
6.42  
6.41  
6.40  
6.39  
6.38  
6.37  
6.36  
6.35  
6.34  
6.33  
6.32  
6.31  
6.30  
6.29  
6.28  
6.27  
6.26  
6.25  
6.24  
6.23  
6.22  
6.21  
6.20  
6.19  
6.18  
6.17  
6.16  
6.15  
6.14  
6.13  
6.12  
6.11  
6.10  
6.09  
6.08  
6.07  
6.06  
6.05  
6.04  
6.03  
6.02  
6.01  
6.00  
5.99  
5.98  
5.97  
5.96  
5.95  
5.94  
5.93  
5.92  
5.91  
5.90  
5.89  
5.88  
5.87  
5.86  
5.85  
5.84  
5.83  
5.82  
5.81  
5.80  
5.79  
5.78  
5.77  
5.76  
5.75  
5.74  
5.73  
5.72  
5.71  
5.70  
5.69  
5.68  
5.67  
5.66  
5.65  
5.64  
5.63  
5.62  
5.61  
5.60  
5.59  
5.58  
5.57  
5.56  
5.55  
5.54  
5.53  
5.52  
5.51  
5.50  
5.49  
5.48  
5.47  
5.46  
5.45  
5.44  
5.43  
5.42  
5.41  
5.40  
5.39  
5.38  
5.37  
5.36  
5.35  
5.34  
5.33  
5.32  
5.31  
5.30  
5.29  
5.28  
5.27  
5.26  
5.25  
5.24  
5.23  
5.22  
5.21  
5.20  
5.19  
5.18  
5.17  
5.16  
5.15  
5.14  
5.13  
5.12  
5.11  
5.10  
5.09  
5.08  
5.07  
5.06  
5.05  
5.04  
5.03  
5.02  
5.01  
5.00  
4.99  
4.98  
4.97  
4.96  
4.95  
4.94  
4.93  
4.92  
4.91  
4.90  
4.89  
4.88  
4.87  
4.86  
4.85  
4.84  
4.83  
4.82  
4.81  
4.80  
4.79  
4.78  
4.77  
4.76  
4.75  
4.74  
4.73  
4.72  
4.71  
4.70  
4.69  
4.68  
4.67  
4.66  
4.65  
4.64  
4.63  
4.62  
4.61  
4.60  
4.59  
4.58  
4.57  
4.56  
4.55  
4.54  
4.53  
4.52  
4.51  
4.50  
4.49  
4.48  
4.47  
4.46  
4.45  
4.44  
4.43  
4.42  
4.41  
4.40  
4.39  
4.38  
4.37  
4.36  
4.35  
4.34  
4.33  
4.32  
4.31  
4.30  
4.29  
4.28  
4.27  
4.26  
4.25  
4.24  
4.23  
4.22  
4.21  
4.20  
4.19  
4.18  
4.17  
4.16  
4.15  
4.14  
4.13  
4.12  
4.11  
4.10  
4.09  
4.08  
4.07  
4.06  
4.05  
4.04  
4.03  
4.02  
4.01  
4.00  
3.99  
3.98  
3.97  
3.96  
3.95  
3.94  
3.93  
3.92  
3.91  
3.90  
3.89  
3.88  
3.87  
3.86  
3.85  
3.84  
3.83  
3.82  
3.81  
3.80  
3.79  
3.78  
3.77  
3.76  
3.75  
3.74  
3.73  
3.72  
3.71  
3.70  
3.69  
3.68  
3.67  
3.66  
3.65  
3.64  
3.63  
3.62  
3.61  
3.60  
3.59  
3.58  
3.57  
3.56  
3.55  
3.54  
3.53  
3.52  
3.51  
3.50  
3.49  
3.48  
3.47  
3.46  
3.45  
3.44  
3.43  
3.42  
3.41  
3.40  
3.39  
3.38  
3.37  
3.36  
3.35  
3.34  
3.33  
3.32  
3.31  
3.30  
3.29  
3.28  
3.27  
3.26  
3.25  
3.24  
3.23  
3.22  
3.21  
3.20  
3.19  
3.18  
3.17  
3.16  
3.15  
3.14  
3.13  
3.12  
3.11  
3.10  
3.09  
3.08  
3.07  
3.06  
3.05  
3.04  
3.03  
3.02  
3.01  
3.00  
2.99  
2.98  
2.97  
2.96  
2.95  
2.94  
2.93  
2.92  
2.91  
2.90  
2.89  
2.88  
2.87  
2.86  
2.85  
2.84  
2.83  
2.82  
2.81  
2.80  
2.79  
2.78  
2.77  
2.76  
2.75  
2.74  
2.73  
2.72  
2.71  
2.70  
2.69  
2.68  
2.67  
2.66  
2.65  
2.64  
2.63  
2.62  
2.61  
2.60  
2.59  
2.58  
2.57  
2.56  
2.55  
2.54  
2.53  
2.52  
2.51  
2.50  
2.49  
2.48  
2.47  
2.46  
2.45  
2.44  
2.43  
2.42  
2.41  
2.40  
2.39  
2.38  
2.37  
2.36  
2.35  
2.34  
2.33  
2.32  
2.31  
2.30  
2.29  
2.28  
2.27  
2.26  
2.25  
2.24  
2.23  
2.22  
2.21  
2.20  
2.19  
2.18  
2.17  
2.16  
2.15  
2.14  
2.13  
2.12  
2.11  
2.10  
2.09  
2.08  
2.07  
2.06  
2.05  
2.04  
2.03  
2.02  
2.01  
2.00  
1.99  
1.98  
1.97  
1.96  
1.95  
1.94  
1.93  
1.92  
1.91  
1.90  
1.89  
1.88  
1.87  
1.86  
1.85  
1.84  
1.83  
1.82  
1.81  
1.80  
1.79  
1.78  
1.77  
1.76  
1.75  
1.74  
1.73  
1.72  
1.71  
1.70  
1.69  
1.68  
1.67  
1.66  
1.65  
1.64  
1.63  
1.62  
1.61  
1.60  
1.59  
1.58  
1.57  
1.56  
1.55  
1.54  
1.53  
1.52  
1.51  
1.50  
1.49  
1.48  
1.47  
1.46  
1.45  
1.44  
1.43  
1.42  
1.41  
1.40  
1.39  
1.38  
1.37  
1.36  
1.35  
1.34  
1.33  
1.32  
1.31  
1.30  
1.29  
1.28  
1.27  
1.26  
1.25  
1.24  
1.23  
1.22  
1.21  
1.20  
1.19  
1.18  
1.17  
1.16  
1.15  
1.14  
1.13  
1.12  
1.11  
1.10  
1.09  
1.08  
1.07  
1.06  
1.05  
1.04  
1.03  
1.02  
1.01  
1.00  
0.99  
0.98  
0.97  
0.96  
0.95  
0.94  
0.93  
0.92  
0.91  
0.90  
0.89  
0.88  
0.87  
0.86  
0.85  
0.84  
0.83  
0.82  
0.81  
0.80  
0.79  
0.78  
0.77  
0.76  
0.75  
0.74  
0.73  
0.72  
0.71  
0.70  
0.69  
0.68  
0.67  
0.66  
0.65  
0.64  
0.63  
0.62  
0.61  
0.60  
0.59  
0.58  
0.57  
0.56  
0.55  
0.54  
0.53  
0.52  
0.51  
0.50  
0.49  
0.48  
0.47  
0.46  
0.45  
0.44  
0.43  
0.42  
0.41  
0.40  
0.39  
0.38  
0.37  
0.36  
0.35  
0.34  
0.33  
0.32  
0.31  
0.30  
0.29  
0.28  
0.27  
0.26  
0.25  
0.24  
0.23  
0.22  
0.21  
0.20  
0.19  
0.18  
0.17  
0.16  
0.15  
0.14  
0.13  
0.12  
0.11  
0.10  
0.09  
0.08  
0.07  
0.06  
0.05  
0.04  
0.03  
0.02  
0.01  
0.00  
-0.01  
-0.02  
-0.03  
-0.04  
-0.05  
-0.06  
-0.07  
-0.08  
-0.09  
-0.10

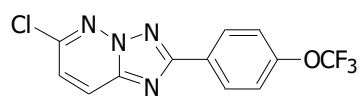

3e

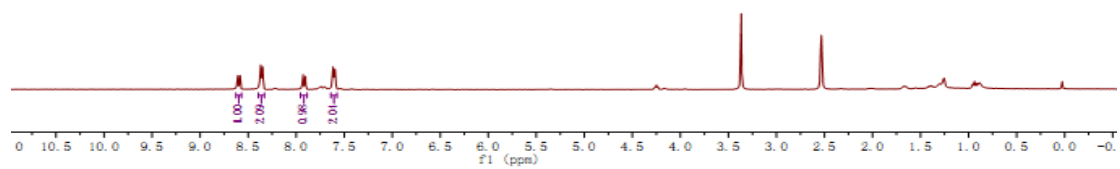

161.07  
150.39  
149.39  
148.31  
129.12  
128.11  
127.01  
125.05  
124.05

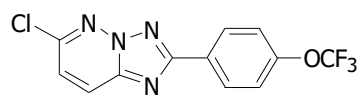

3e

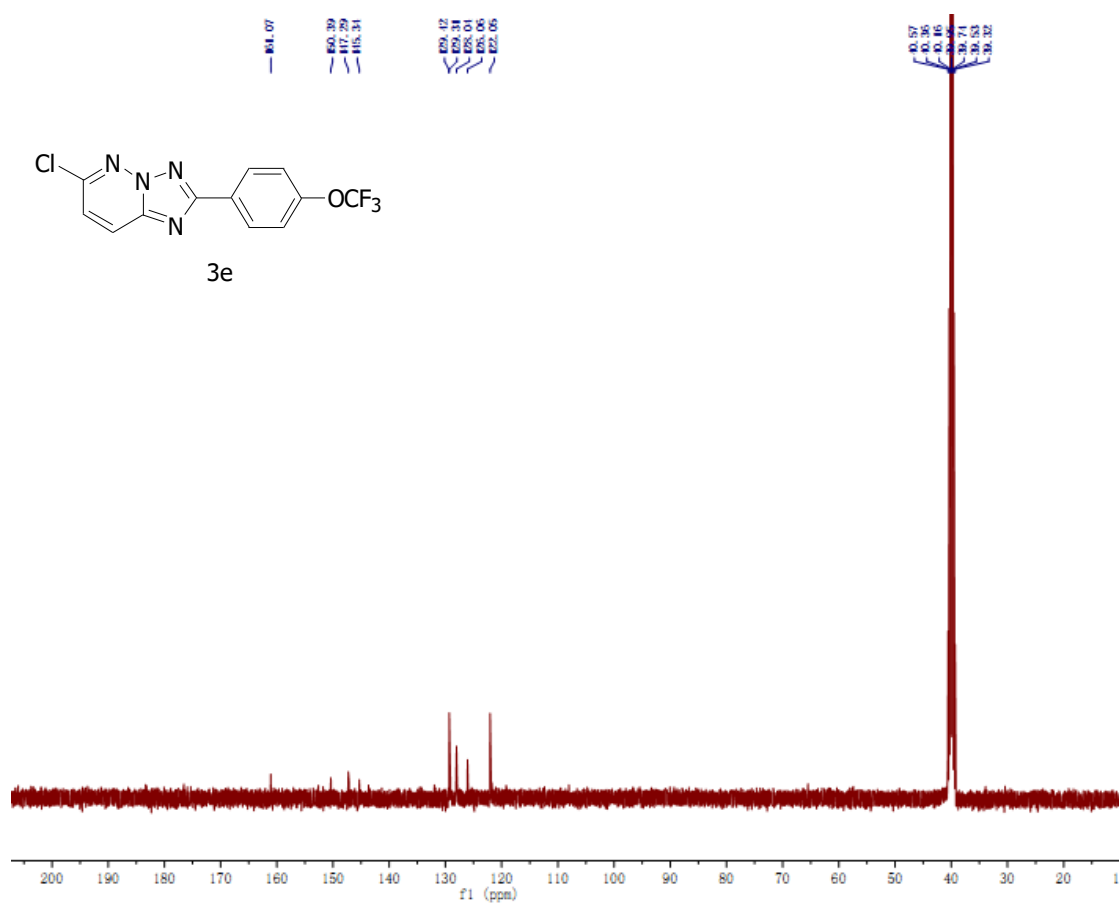

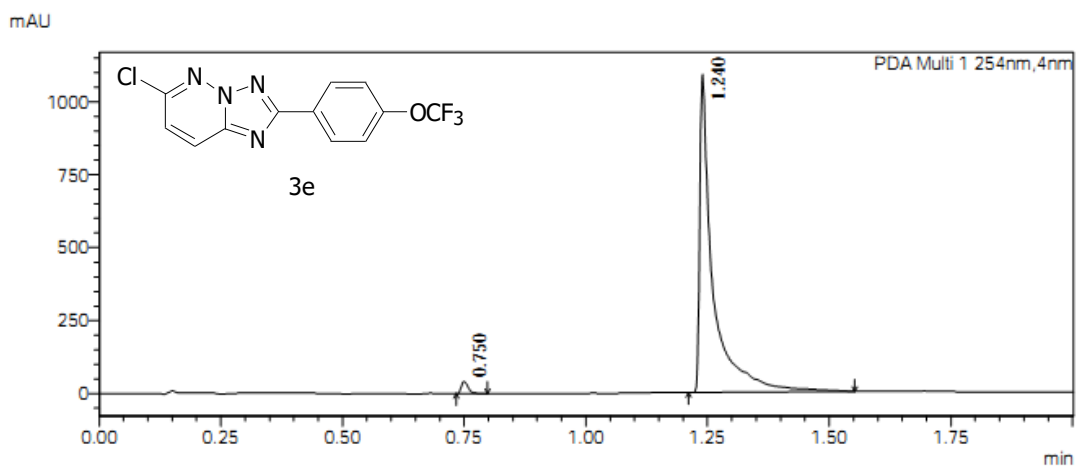

Peak Table

| Peak# | Ret. Time | Height  | Height% | Area    | Area%   |
|-------|-----------|---------|---------|---------|---------|
| 1     | 0.750     | 40047   | 3.561   | 40127   | 1.897   |
| 2     | 1.240     | 1084424 | 96.439  | 2075182 | 98.103  |
| Total |           | 1124471 | 100.000 | 2115309 | 100.000 |

Line#:1 R.Time:1.240(Scan#:159)  
 MassPeaks:382  
 Spectrum Mode:Averaged 1.231-1.248(158-160) BasePeak:315(611193)  
 BG Mode:Calc Segment 1 - Event 1

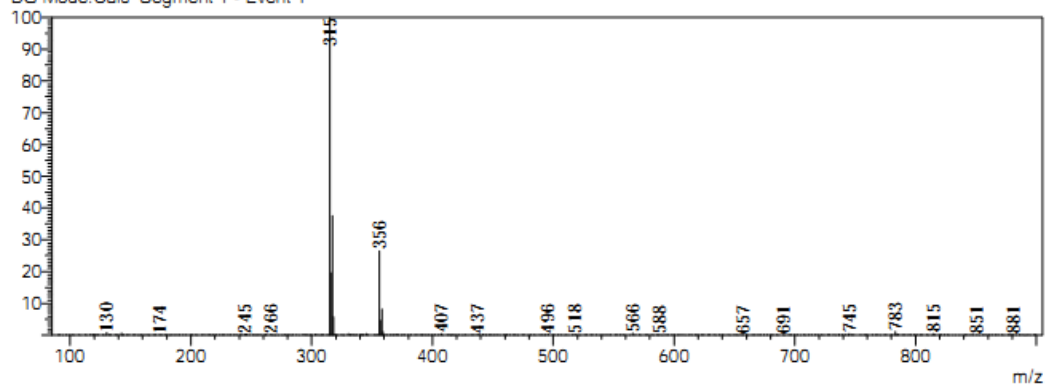



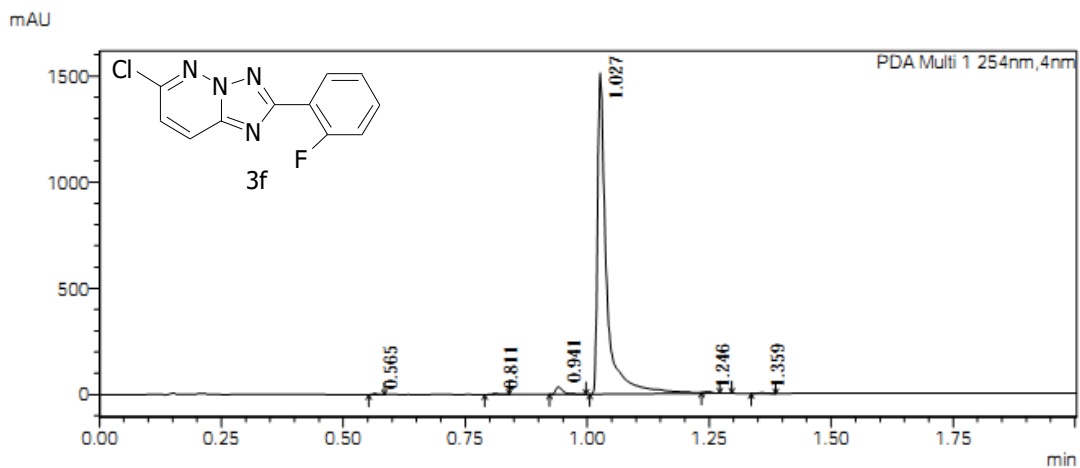

PDA Ch1 254nm

Peak Table

| Peak# | Ret. Time | Height  | Height% | Area    | Area%   |
|-------|-----------|---------|---------|---------|---------|
| 1     | 0.565     | 3651    | 0.237   | 2870    | 0.142   |
| 2     | 0.811     | 3054    | 0.198   | 3095    | 0.154   |
| 3     | 0.941     | 34292   | 2.227   | 36707   | 1.821   |
| 4     | 1.027     | 1491056 | 96.844  | 1965868 | 97.516  |
| 5     | 1.246     | 4132    | 0.268   | 3799    | 0.188   |
| 6     | 1.359     | 3465    | 0.225   | 3605    | 0.179   |
| Total |           | 1539650 | 100.000 | 2015945 | 100.000 |

Line#:1 R.Time:1.023(Scan#:133)  
 MassPeaks:353  
 Spectrum Mode:Averaged 1.015-1.031(132-134) BasePeak:249(896040)  
 BG Mode:Calc Segment 1 - Event 1

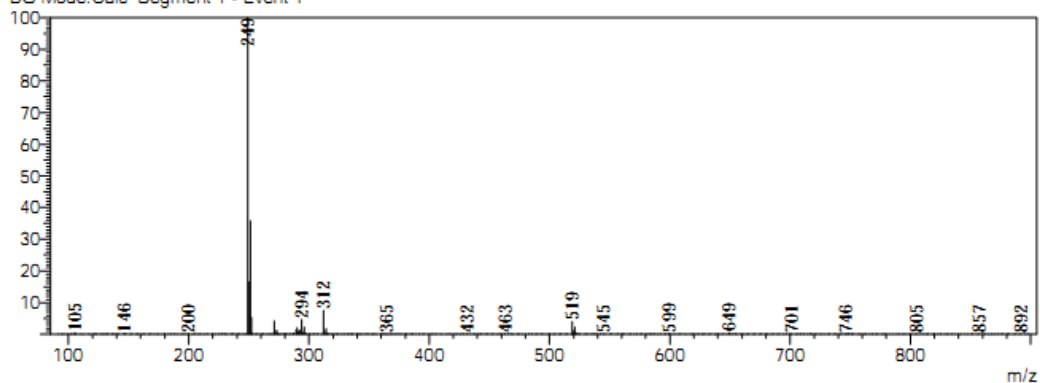





mAU

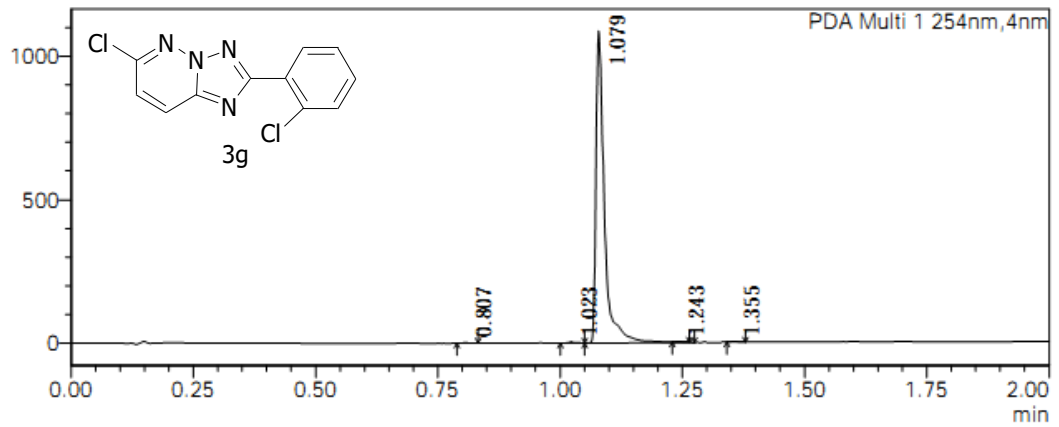

Peak Table

PDA Ch1 254nm

| Peak# | Ret. Time | Height  | Height% | Area    | Area%   |
|-------|-----------|---------|---------|---------|---------|
| 1     | 0.807     | 2307    | 0.211   | 2312    | 0.175   |
| 2     | 1.023     | 2929    | 0.268   | 3530    | 0.268   |
| 3     | 1.079     | 1082494 | 99.036  | 1308083 | 99.201  |
| 4     | 1.243     | 2311    | 0.211   | 2119    | 0.161   |
| 5     | 1.355     | 2989    | 0.274   | 2578    | 0.195   |
| Total |           | 1093030 | 100.000 | 1318622 | 100.000 |

Line#:1 R.Time:1.081(Scan#:140)

MassPeaks:439

Spectrum Mode:Averaged 1.073-1.090(139-141) BasePeak:265.05(1096597)

BG Mode:Calc Segment 1 - Event 1

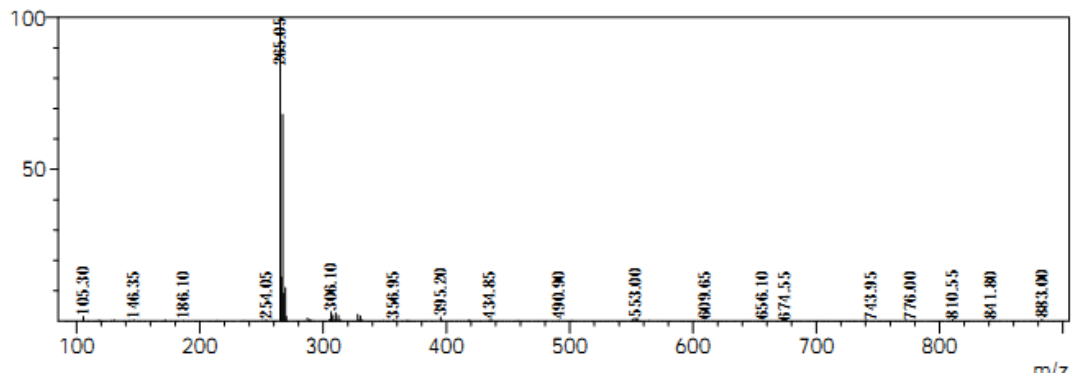



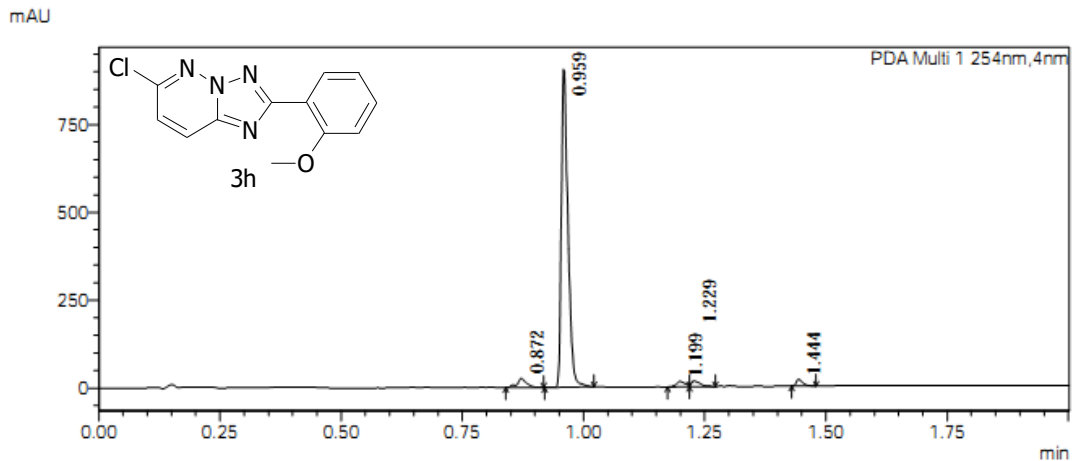

Peak Table

| Peak# | Ret. Time | Height | Height% | Area   | Area%   |
|-------|-----------|--------|---------|--------|---------|
| 1     | 0.872     | 25920  | 2.648   | 35617  | 3.693   |
| 2     | 0.959     | 901845 | 92.118  | 870550 | 90.261  |
| 3     | 1.199     | 15870  | 1.621   | 19899  | 2.063   |
| 4     | 1.229     | 16122  | 1.647   | 19952  | 2.069   |
| 5     | 1.444     | 19252  | 1.966   | 18467  | 1.915   |
| Total |           | 979009 | 100.000 | 964484 | 100.000 |

Line#:1 R.Time:0.956(Scan#:125)  
 MassPeaks:397  
 Spectrum Mode:Averaged 0.948-0.965(124-126) BasePeak:261(534678)  
 BG Mode:Calc Segment 1 - Event 1

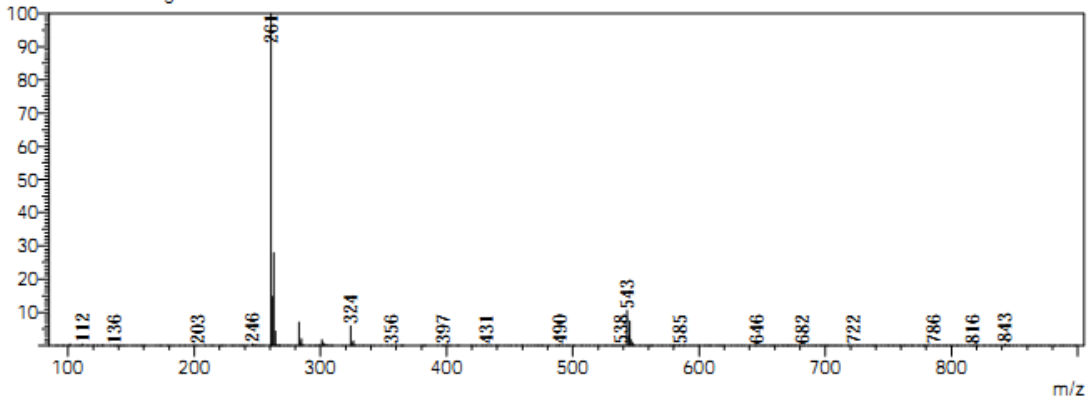

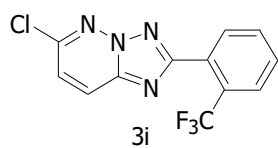

8.61  
8.60  
8.60  
8.59  
8.59  
7.97  
7.96  
7.96  
7.91  
7.93  
7.90  
7.88  
7.88  
7.88  
7.85  
7.81  
7.83  
7.82  
7.80  
7.79  
7.78  
7.77  
7.76  
7.75

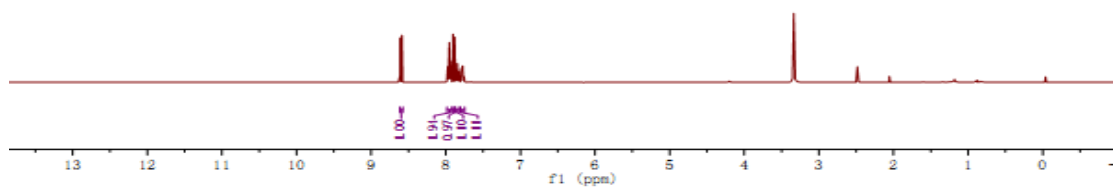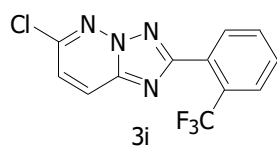

161.18  
147.77  
145.43  
142.88  
141.43  
139.51  
138.26  
137.03  
137.35  
137.29  
137.21  
135.52  
132.80

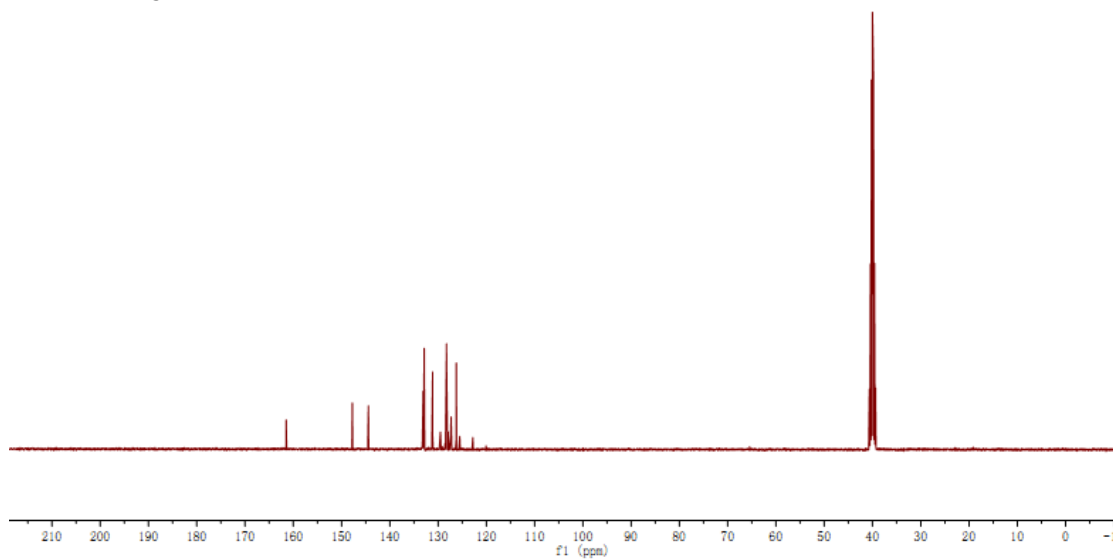

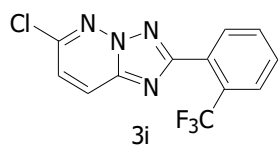

163.91

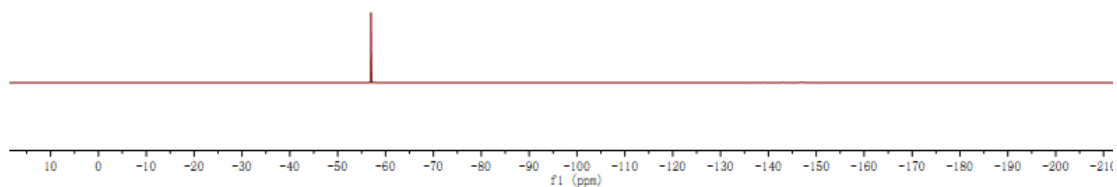

mAU

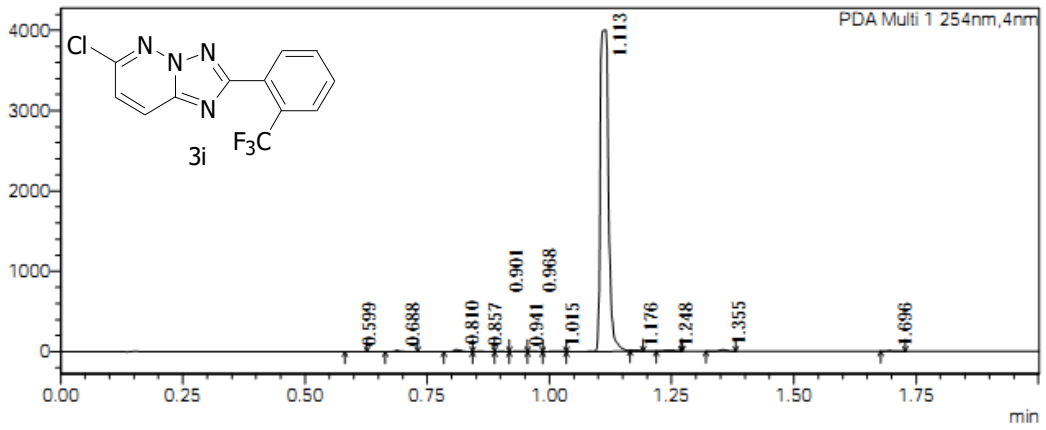

Peak Table

| Peak# | Ret. Time | Height  | Height% | Area    | Area%   |
|-------|-----------|---------|---------|---------|---------|
| 1     | 0.599     | 2930    | 0.071   | 2872    | 0.060   |
| 2     | 0.688     | 11775   | 0.287   | 15061   | 0.314   |
| 3     | 0.810     | 24850   | 0.606   | 24568   | 0.512   |
| 4     | 0.857     | 5716    | 0.139   | 6831    | 0.142   |
| 5     | 0.901     | 4300    | 0.105   | 3973    | 0.083   |
| 6     | 0.941     | 5131    | 0.125   | 6322    | 0.132   |
| 7     | 0.968     | 3478    | 0.085   | 4105    | 0.085   |
| 8     | 1.015     | 6753    | 0.165   | 8671    | 0.181   |
| 9     | 1.113     | 3995370 | 97.417  | 4685202 | 97.579  |
| 10    | 1.176     | 3796    | 0.093   | 2521    | 0.053   |
| 11    | 1.248     | 11373   | 0.277   | 14735   | 0.307   |
| 12    | 1.355     | 20114   | 0.490   | 20874   | 0.435   |
| 13    | 1.696     | 5711    | 0.139   | 5706    | 0.119   |
| Total |           | 4101296 | 100.000 | 4801441 | 100.000 |

Line#:1 R.Time:1.115(Scan#:144)  
 MassPeaks:528  
 Spectrum Mode:Averaged 1.106-1.123(143-145) BasePeak:299(4724019)  
 BG Mode:Calc Segment 1 - Event 1

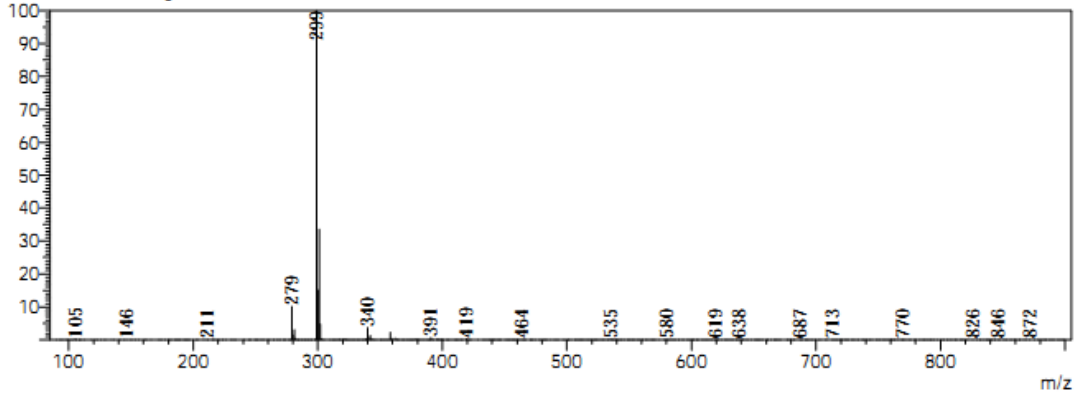

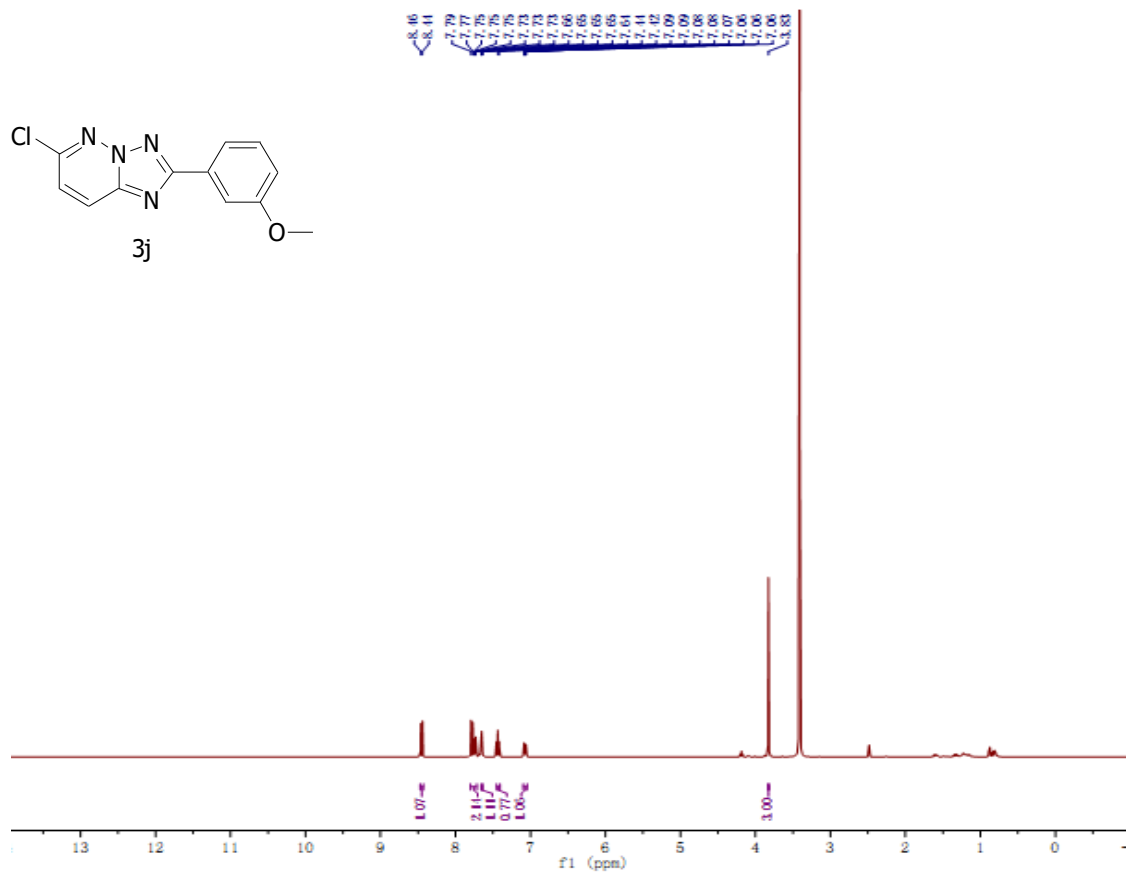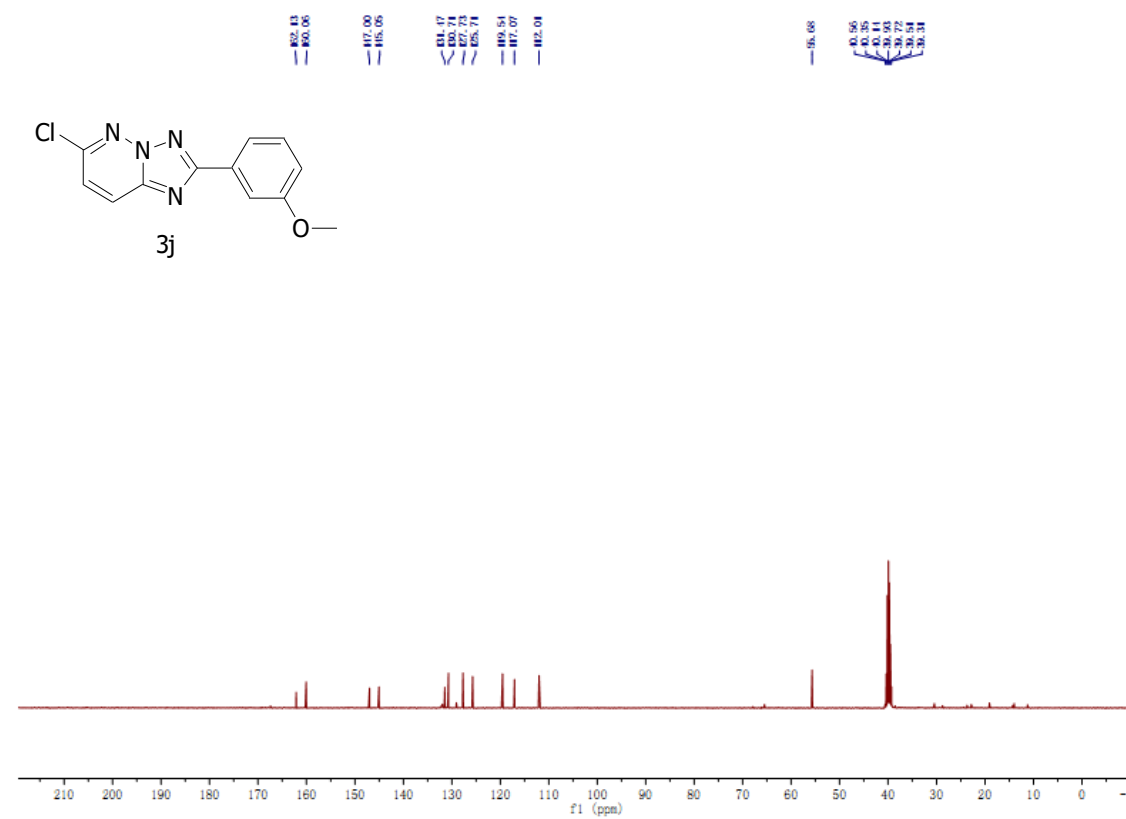



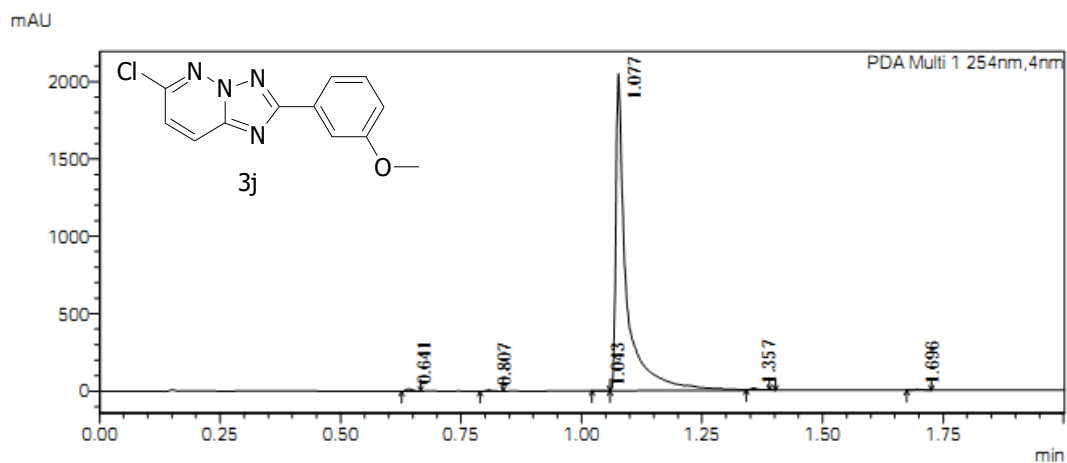

Peak Table

PDA Ch1 254nm

| Peak# | Ret. Time | Height  | Height% | Area    | Area%   |
|-------|-----------|---------|---------|---------|---------|
| 1     | 0.641     | 14245   | 0.686   | 13471   | 0.422   |
| 2     | 0.807     | 4907    | 0.236   | 4912    | 0.154   |
| 3     | 1.043     | 2117    | 0.102   | 1945    | 0.061   |
| 4     | 1.077     | 2042714 | 98.333  | 3160285 | 98.983  |
| 5     | 1.357     | 8955    | 0.431   | 7747    | 0.243   |
| 6     | 1.696     | 4409    | 0.212   | 4407    | 0.138   |
| Total |           | 2077347 | 100.000 | 3192767 | 100.000 |

Line#:1 R.Time:1.073(Scan#:139)  
 MassPeaks:367  
 Spectrum Mode:Averaged 1.065-1.081(138-140) BasePeak:261(817785)  
 BG Mode:Calc Segment 1 - Event 1

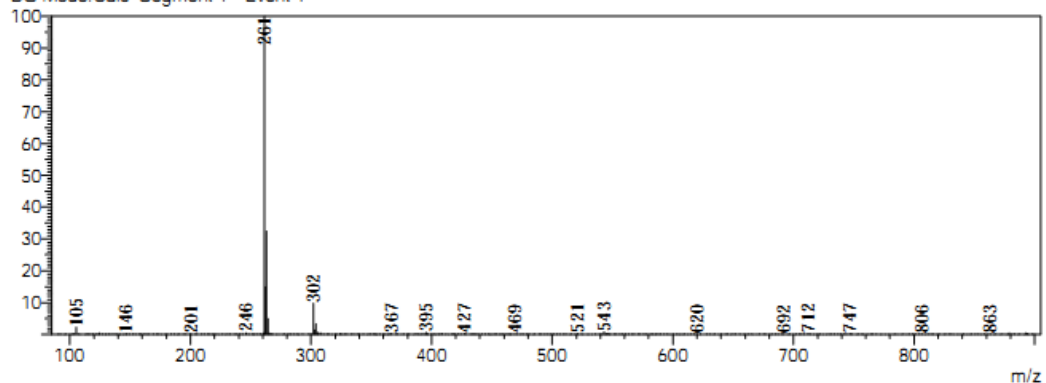

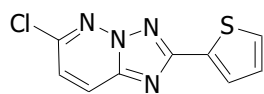

3k

8.18  
7.98  
7.98  
7.85  
7.85  
7.81  
7.82  
7.80  
7.79  
7.79  
7.71  
7.71  
7.72  
7.72

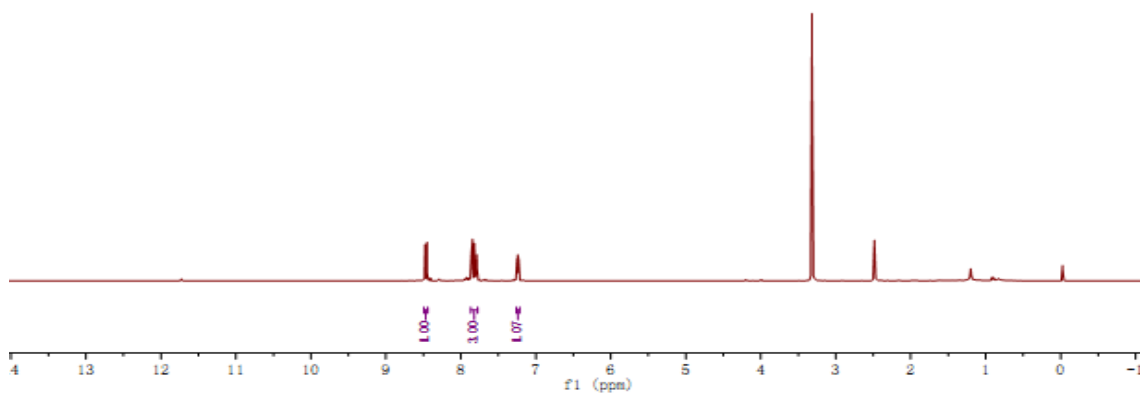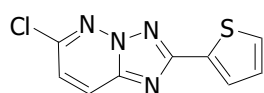

3k

158.08  
145.88  
145.09  
127.90  
127.16  
126.04  
125.19  
125.95  
125.95

40.66  
40.15  
40.03  
39.82  
39.10

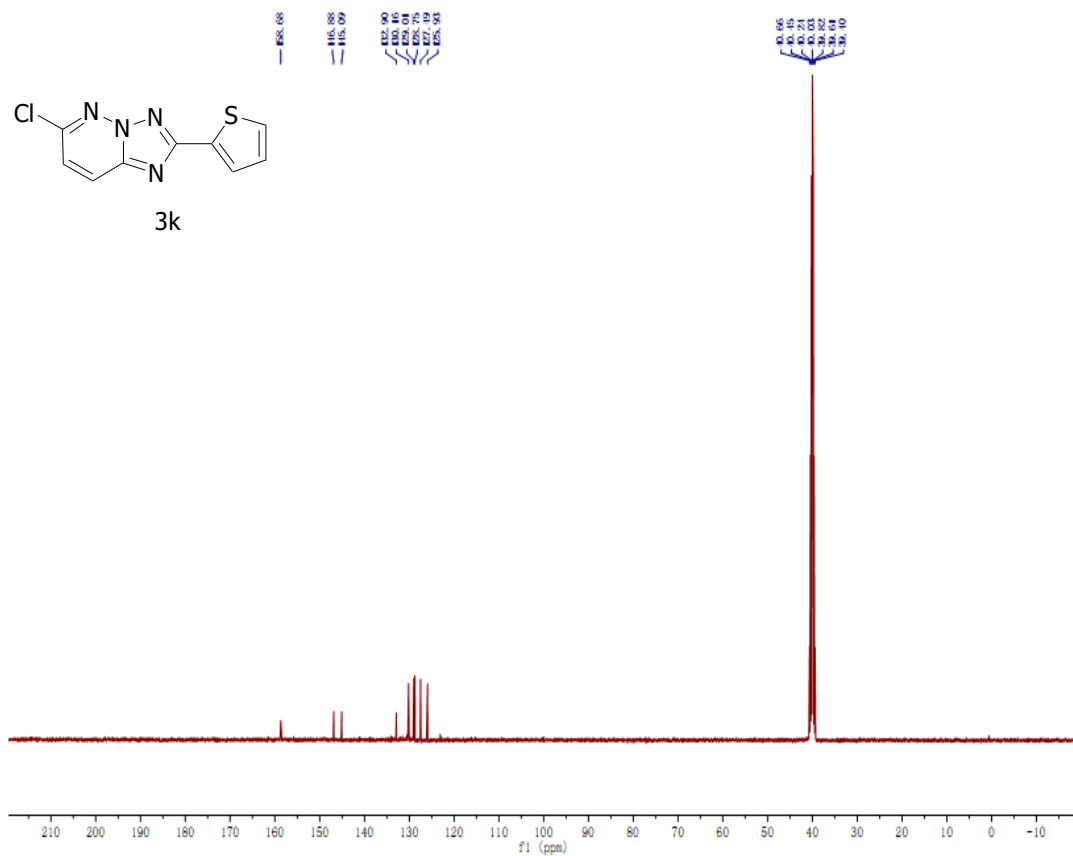

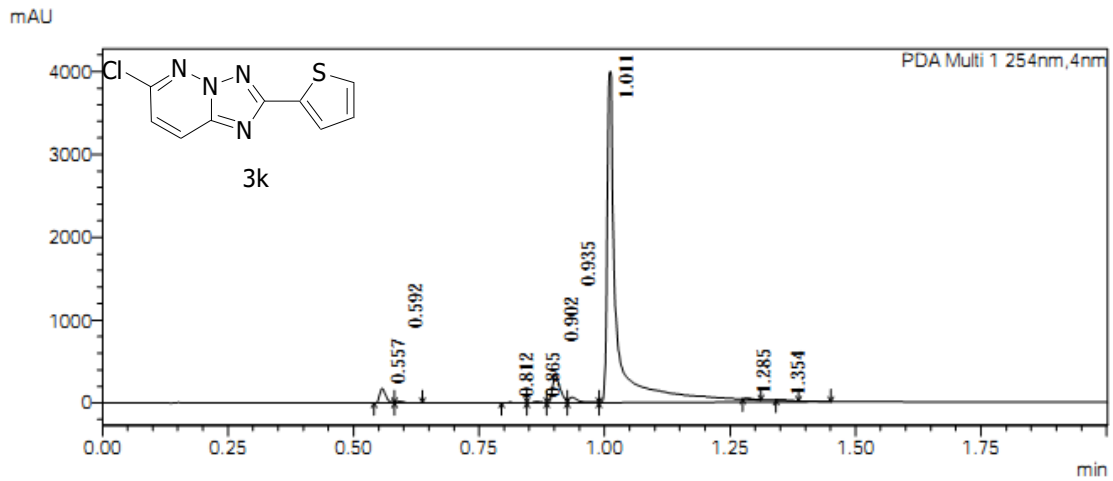

Peak Table  
PDA Ch1 254nm

| Peak# | Ret. Time | Height  | Height% | Area    | Area%   |
|-------|-----------|---------|---------|---------|---------|
| 1     | 0.557     | 173905  | 3.783   | 149008  | 2.419   |
| 2     | 0.592     | 18952   | 0.412   | 19246   | 0.312   |
| 3     | 0.812     | 4786    | 0.104   | 5591    | 0.091   |
| 4     | 0.865     | 12224   | 0.266   | 13102   | 0.213   |
| 5     | 0.902     | 332530  | 7.234   | 349727  | 5.678   |
| 6     | 0.935     | 64412   | 1.401   | 78248   | 1.270   |
| 7     | 1.011     | 3973098 | 86.432  | 5528420 | 89.764  |
| 8     | 1.285     | 11455   | 0.249   | 10199   | 0.166   |
| 9     | 1.354     | 5407    | 0.118   | 5330    | 0.087   |
| Total |           | 4596769 | 100.000 | 6158870 | 100.000 |

Line#:2 R.Time:1.015(Scan#:132)  
MassPeaks:439  
Spectrum Mode:Averaged 1.006-1.023(131-133) BasePeak:237.10(371976)  
BG Mode:Calc Segment 1 - Event 1

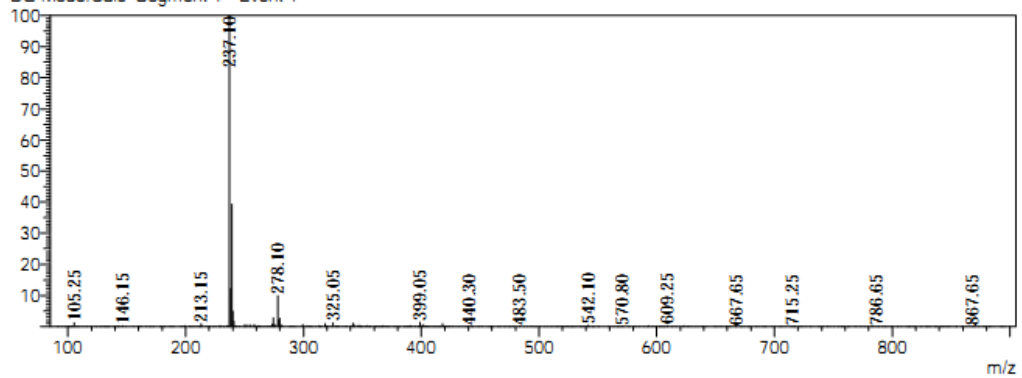

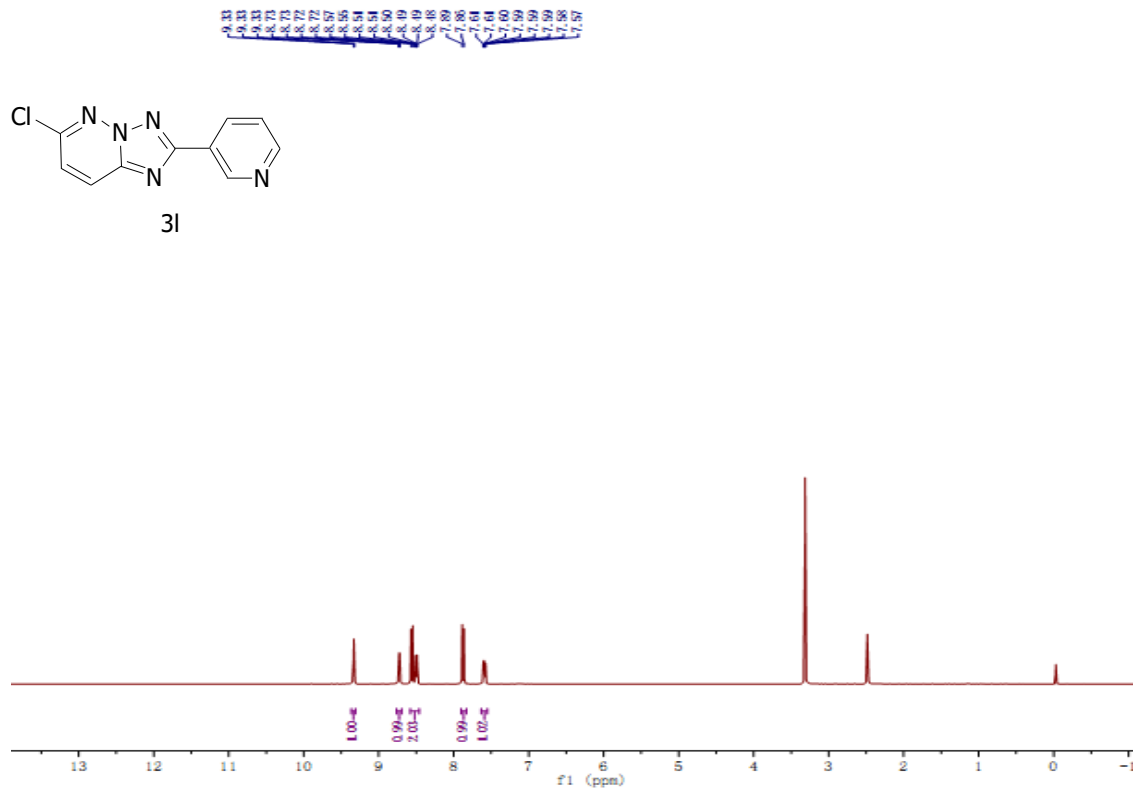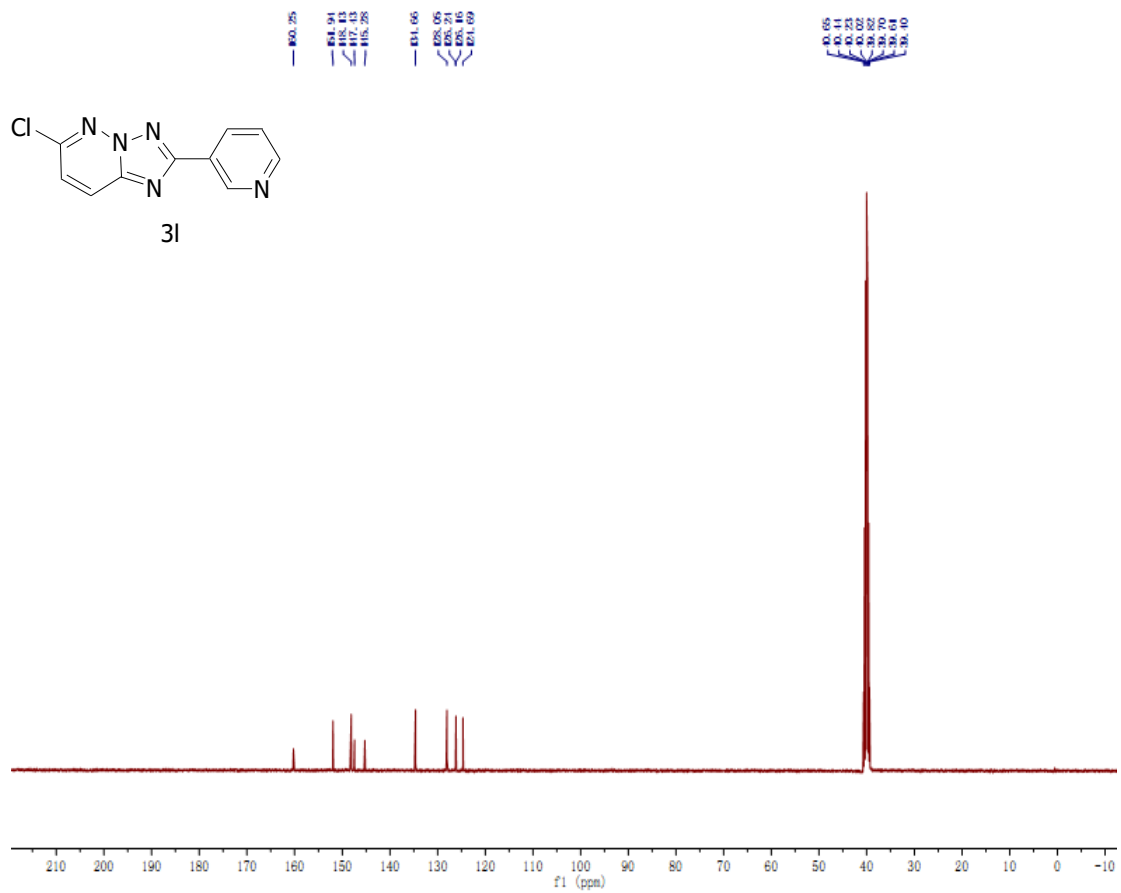

mAU

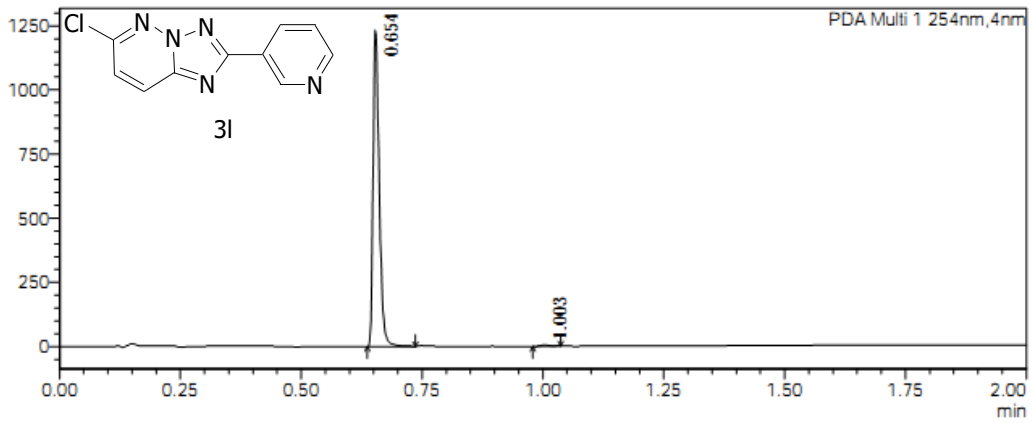

Peak Table

PDA Ch1 254nm

| Peak# | Ret. Time | Height  | Height% | Area    | Area%   |
|-------|-----------|---------|---------|---------|---------|
| 1     | 0.654     | 1202826 | 99.531  | 1089144 | 99.390  |
| 2     | 1.003     | 5669    | 0.469   | 6687    | 0.610   |
| Total |           | 1208495 | 100.000 | 1095830 | 100.000 |

Line#:1 R.Time:0.656(Scan#:89)  
MassPeaks:424  
Spectrum Mode:Averaged 0.648-0.665(88-90) BasePeak:232(138229)  
BG Mode:Calc Segment 1 - Event 1

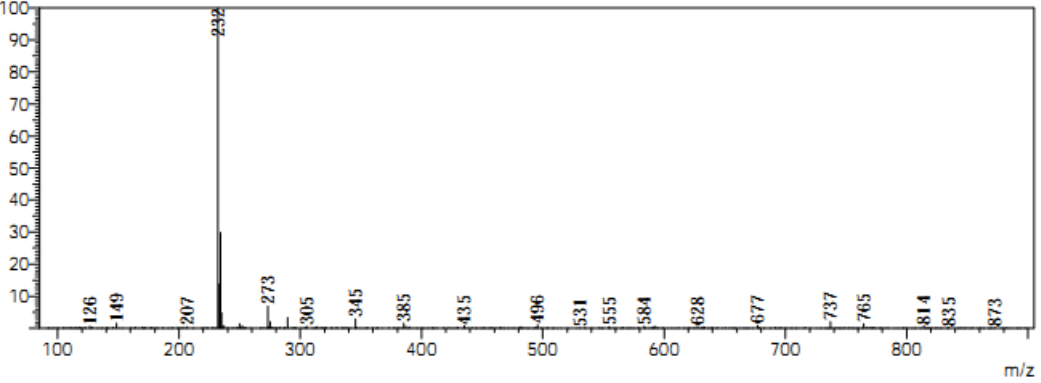

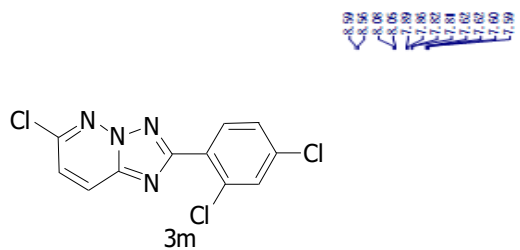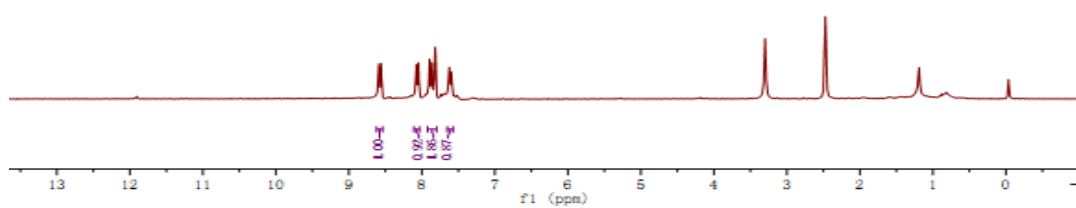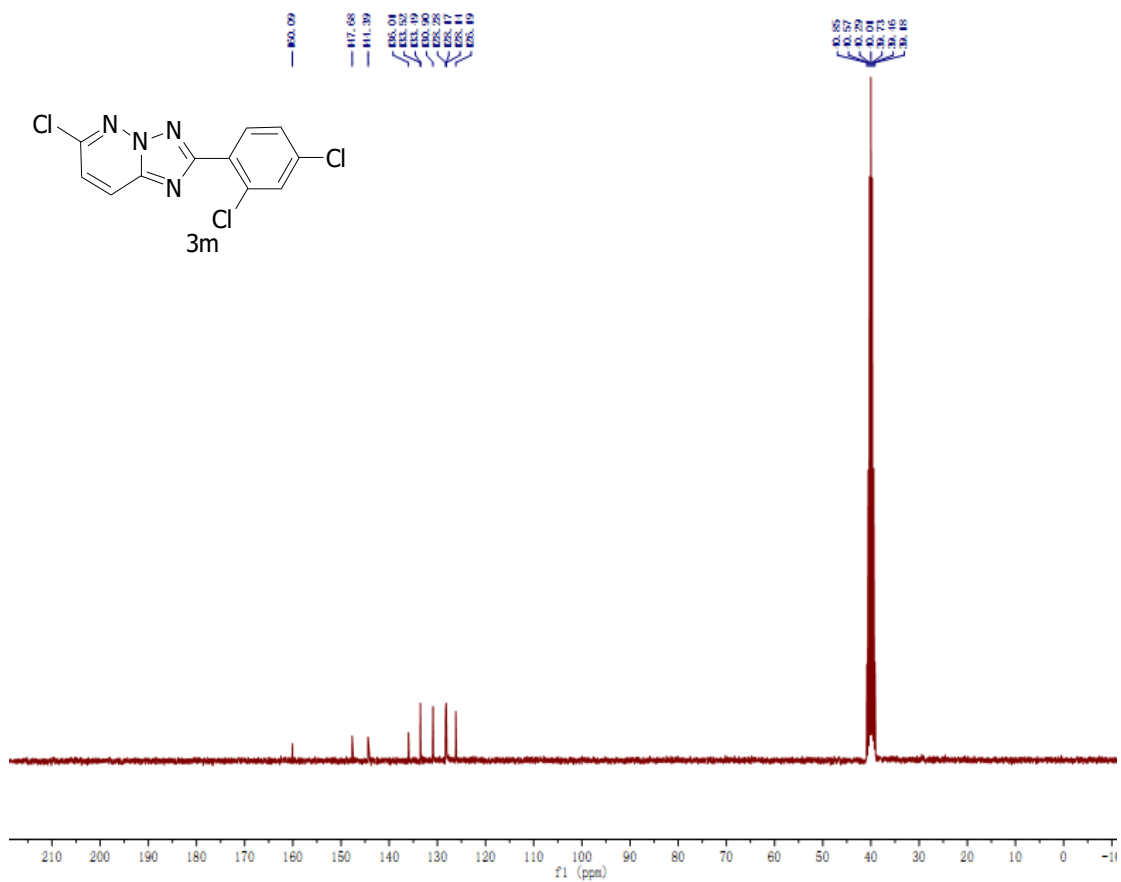

mAU

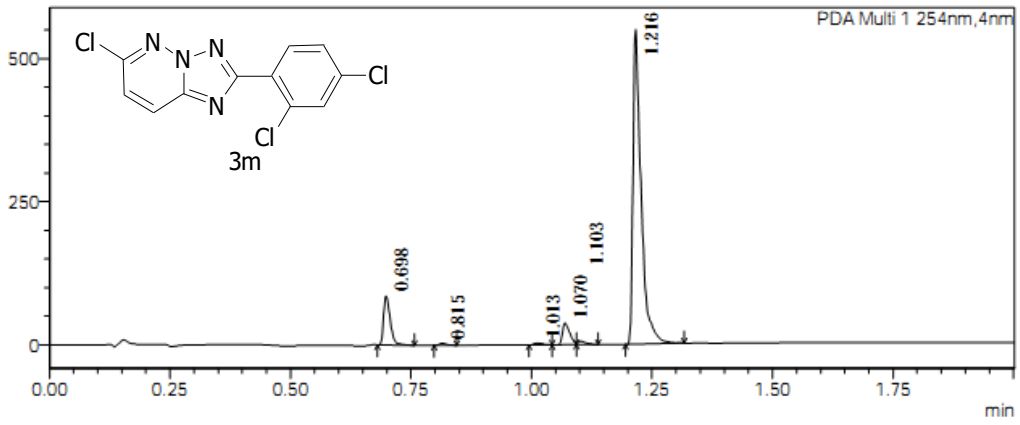

Peak Table

PDA Ch1 254nm

| Peak# | Ret. Time | Height | Height% | Area   | Area%   |
|-------|-----------|--------|---------|--------|---------|
| 1     | 0.698     | 84727  | 12.518  | 81089  | 10.448  |
| 2     | 0.815     | 3632   | 0.537   | 3625   | 0.467   |
| 3     | 1.013     | 2985   | 0.441   | 3524   | 0.454   |
| 4     | 1.070     | 37501  | 5.540   | 39071  | 5.034   |
| 5     | 1.103     | 5701   | 0.842   | 6552   | 0.844   |
| 6     | 1.216     | 542319 | 80.122  | 642285 | 82.753  |
| Total |           | 676864 | 100.000 | 776146 | 100.000 |

Line#:3 R.Time:1.215(Scan#:156)

MassPeaks:388

Spectrum Mode:Averaged 1.206-1.223(155-157) BasePeak:299(54822)

BG Mode:Calc Segment 1 - Event 1

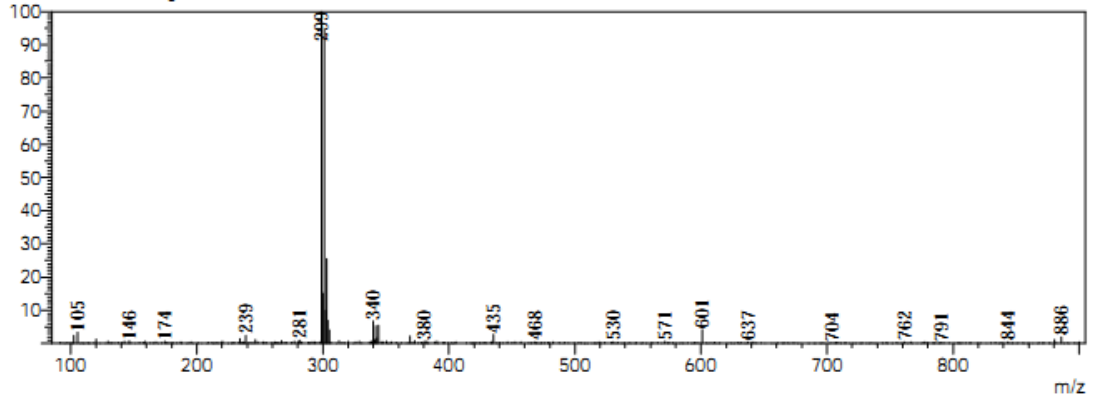

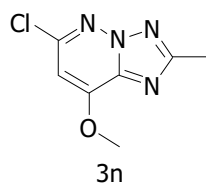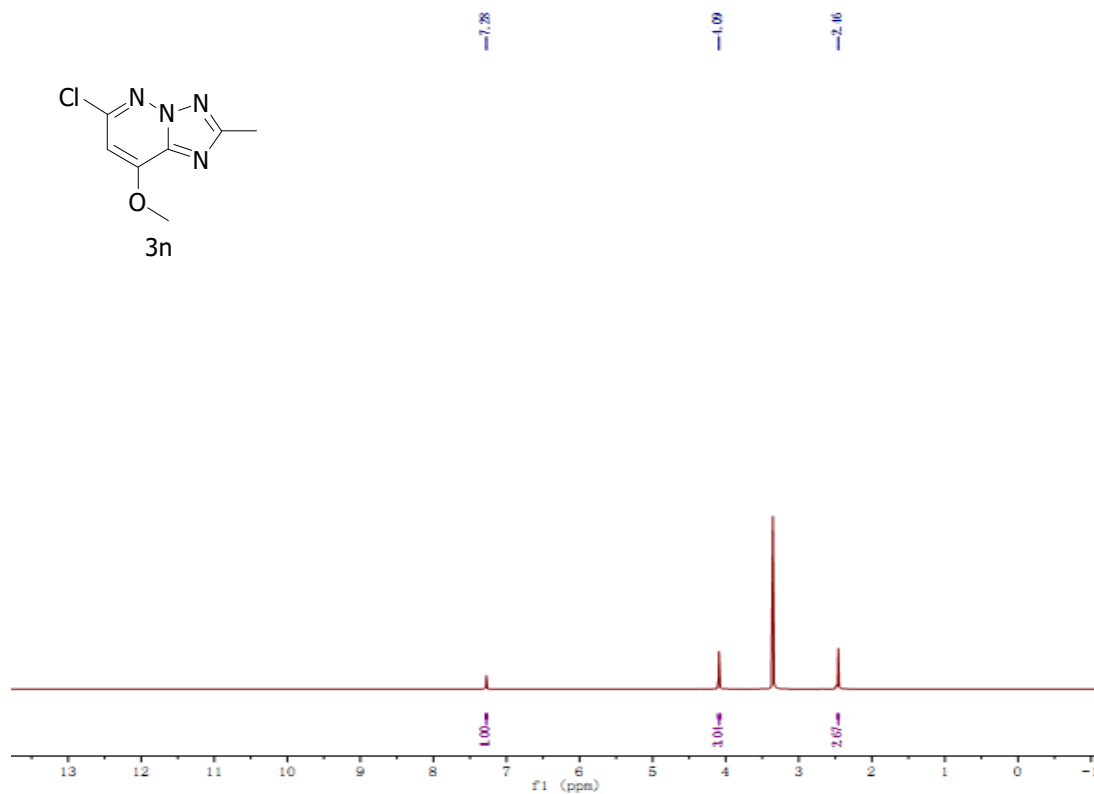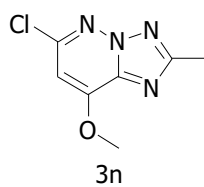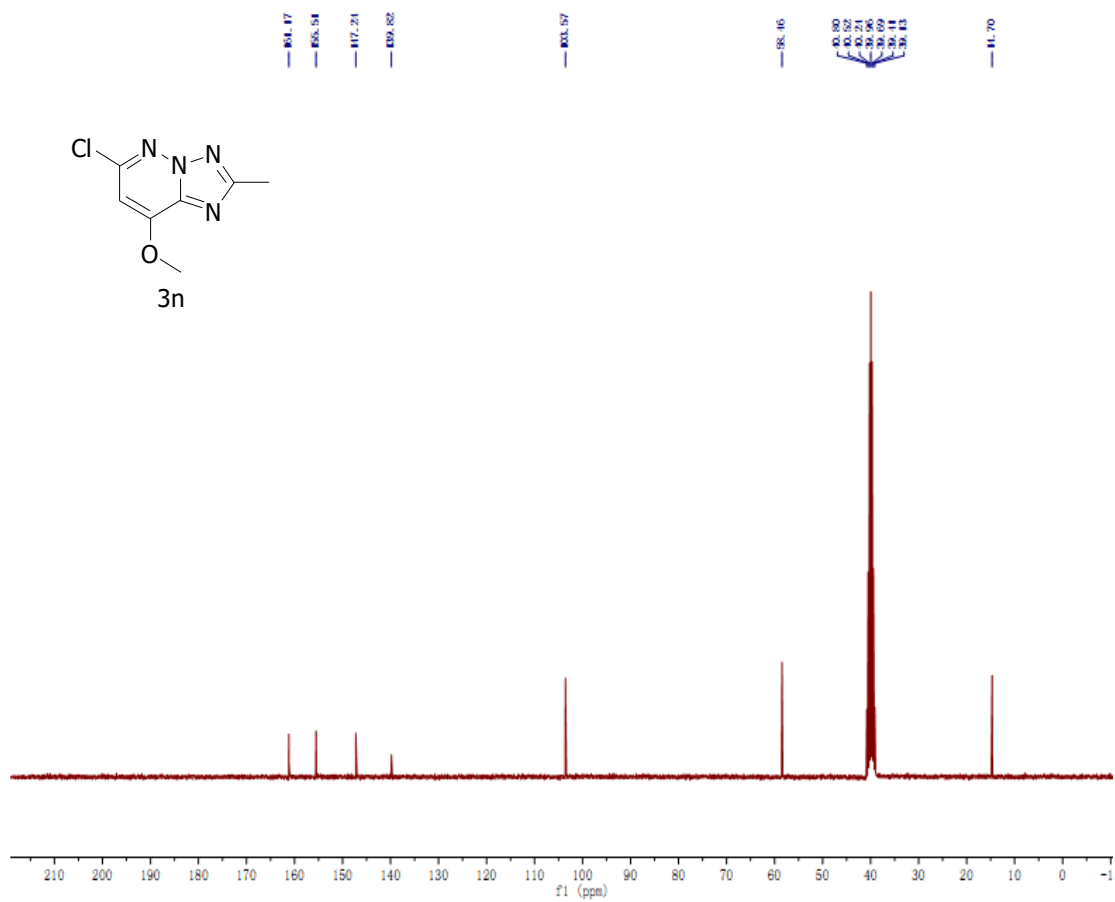



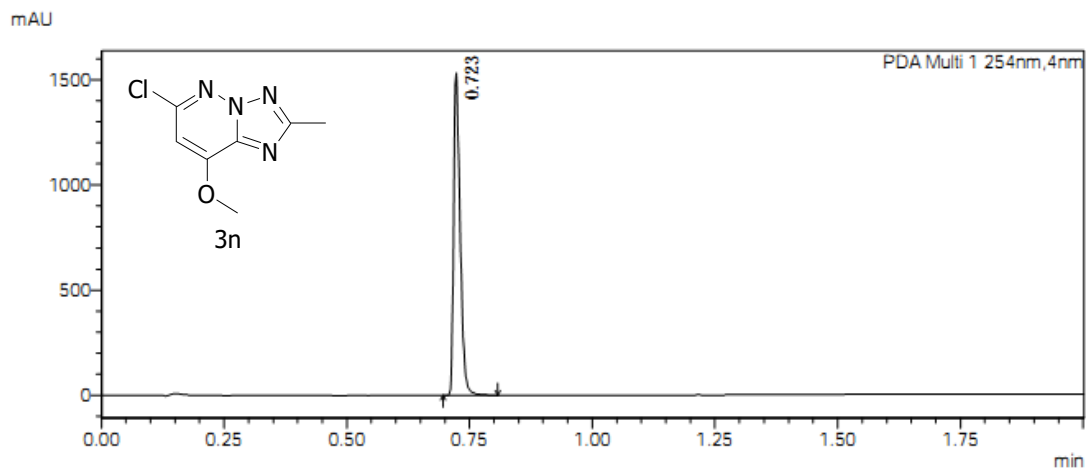

PDA Ch1 254nm

| Peak# | Ret. Time | Height  | Height% | Area    | Area%   |
|-------|-----------|---------|---------|---------|---------|
| 1     | 0.723     | 1507282 | 100.000 | 1418910 | 100.000 |
| Total |           | 1507282 | 100.000 | 1418910 | 100.000 |

Line#:1 R.Time:0.723(Scan#:97)  
 MassPeaks:372  
 Spectrum Mode:Averaged 0.715-0.731(96-98) BasePeak:199(734375)  
 BG Mode:Calc Segment 1 - Event 1

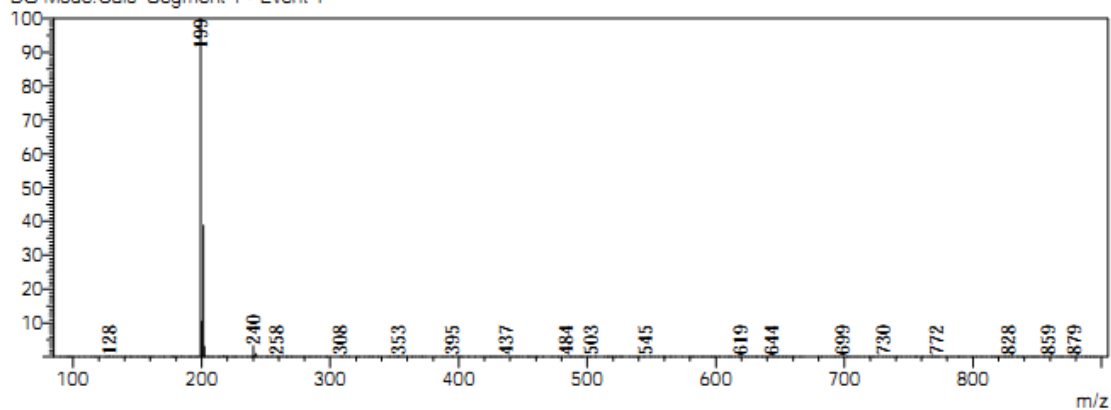



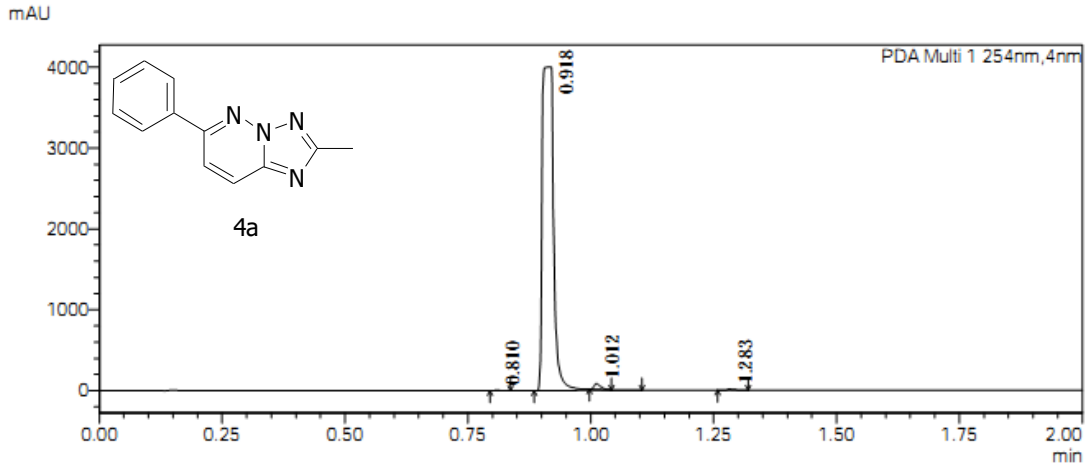

Peak Table

| Peak# | Ret. Time | Height  | Height% | Area    | Area%   |
|-------|-----------|---------|---------|---------|---------|
| 1     | 0.810     | 4355    | 0.107   | 4107    | 0.063   |
| 2     | 0.918     | 3997883 | 97.881  | 6427469 | 98.715  |
| 3     | 1.012     | 69984   | 1.713   | 67356   | 1.034   |
| 4     | 1.283     | 12212   | 0.299   | 12188   | 0.187   |
| Total |           | 4084434 | 100.000 | 6511120 | 100.000 |

Line#:1 R.Time:0.915(Scan#:120)  
 MassPeaks:443  
 Spectrum Mode:Averaged 0.906-0.923(119-121) BasePeak:211(2360958)  
 BG Mode:Calc Segment 1 - Event 1

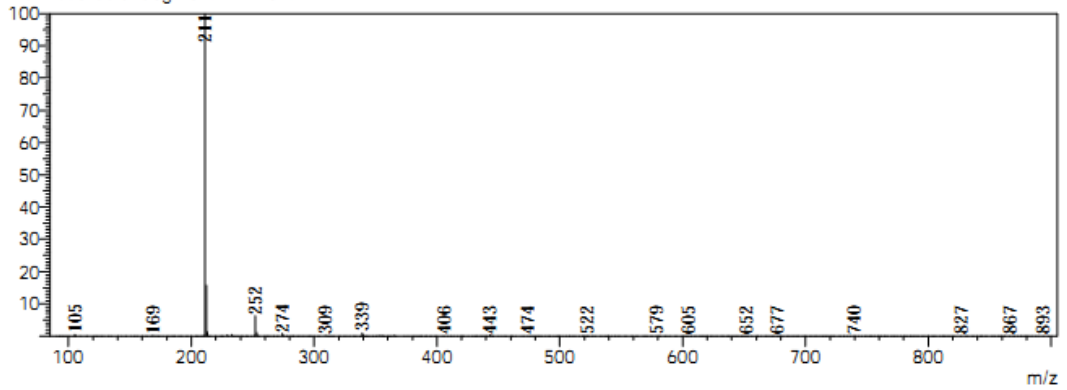



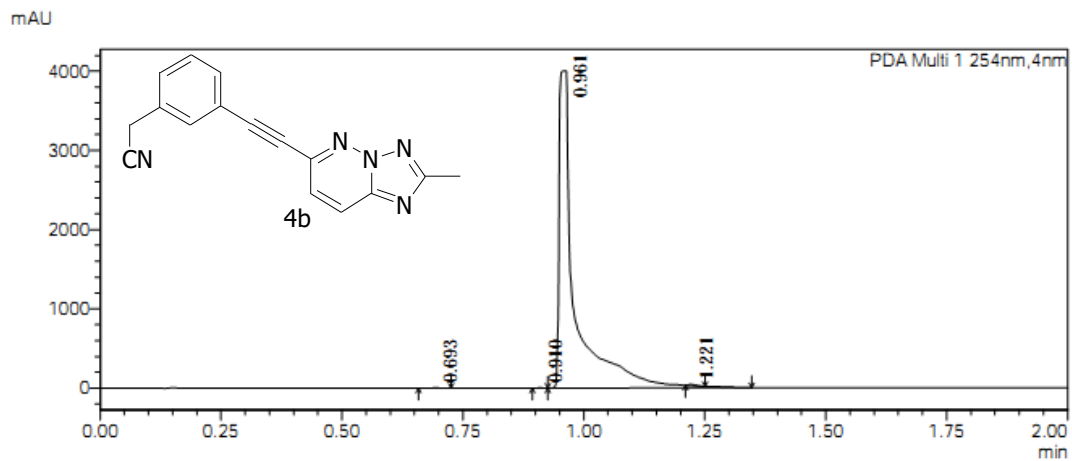

PDA Ch1 254nm

Peak Table

| Peak# | Ret. Time | Height  | Height% | Area    | Area%   |
|-------|-----------|---------|---------|---------|---------|
| 1     | 0.693     | 7139    | 0.177   | 8108    | 0.089   |
| 2     | 0.910     | 2411    | 0.060   | 2020    | 0.022   |
| 3     | 0.961     | 3996101 | 99.265  | 9071081 | 99.695  |
| 4     | 1.221     | 20042   | 0.498   | 17649   | 0.194   |
| Total |           | 4025694 | 100.000 | 9098858 | 100.000 |

Line#:1 R.Time:0.965(Scan#:126)

MassPeaks:550

Spectrum Mode:Averaged 0.956-0.973(125-127) BasePeak:274(1577027)

BG Mode:Calc Segment 1 - Event 1

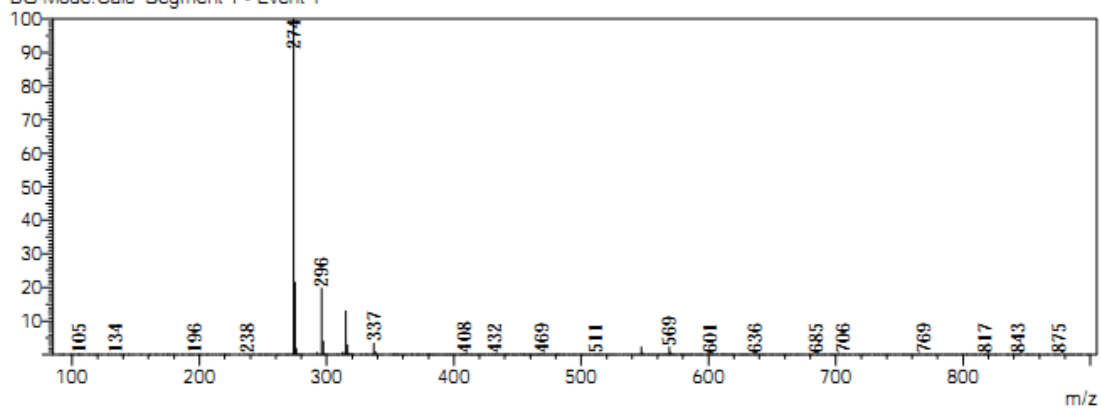

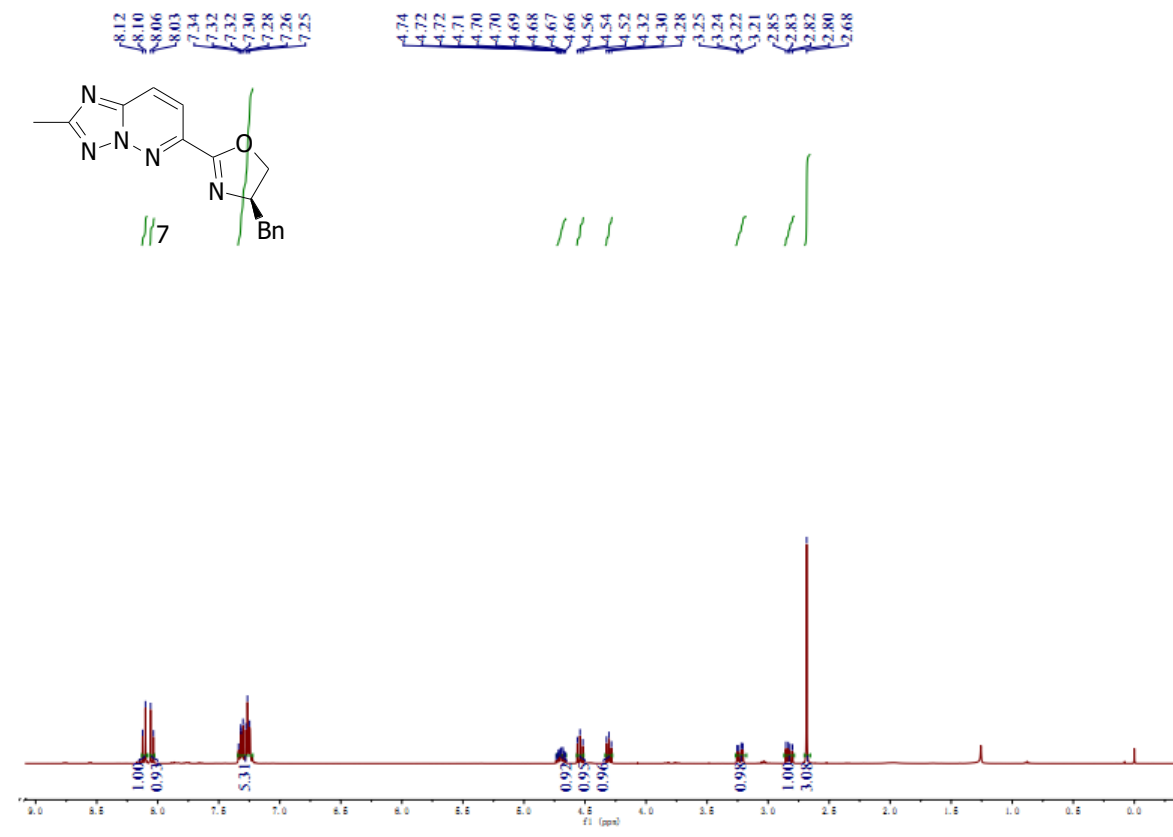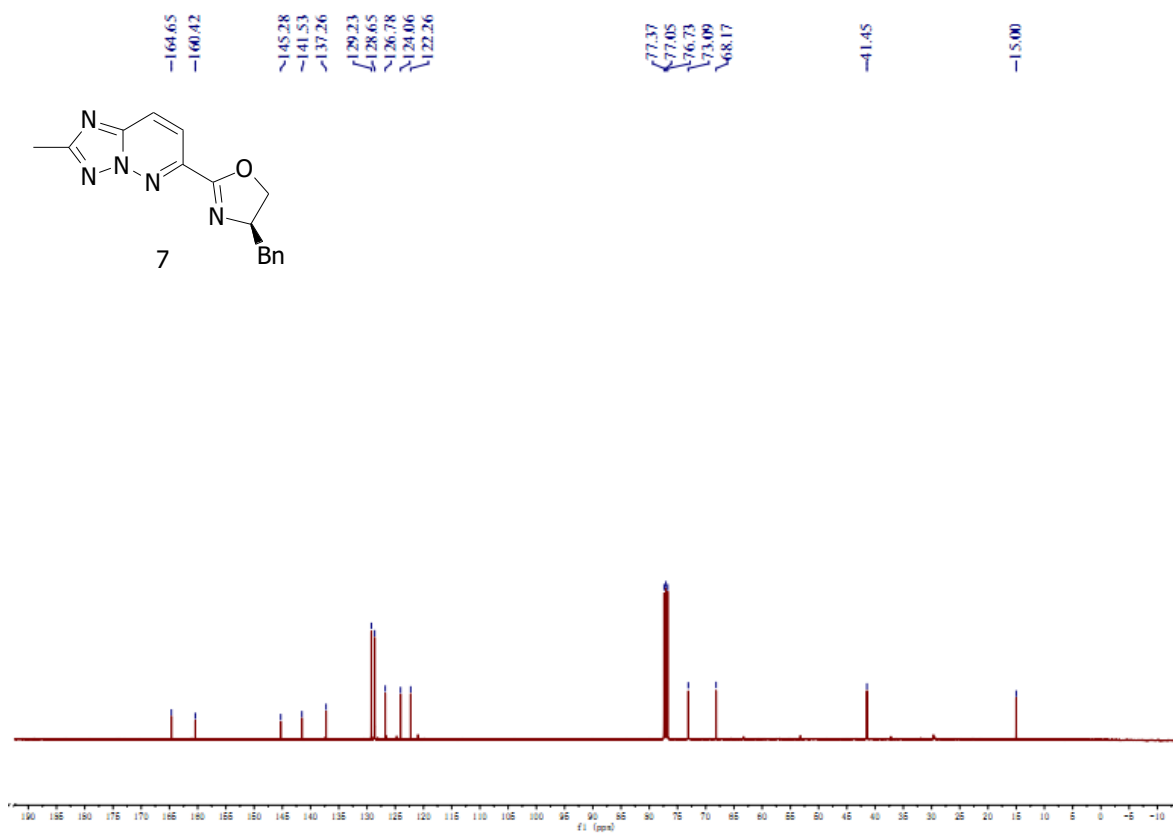

# GC-MS spectrum of product 8

丰度

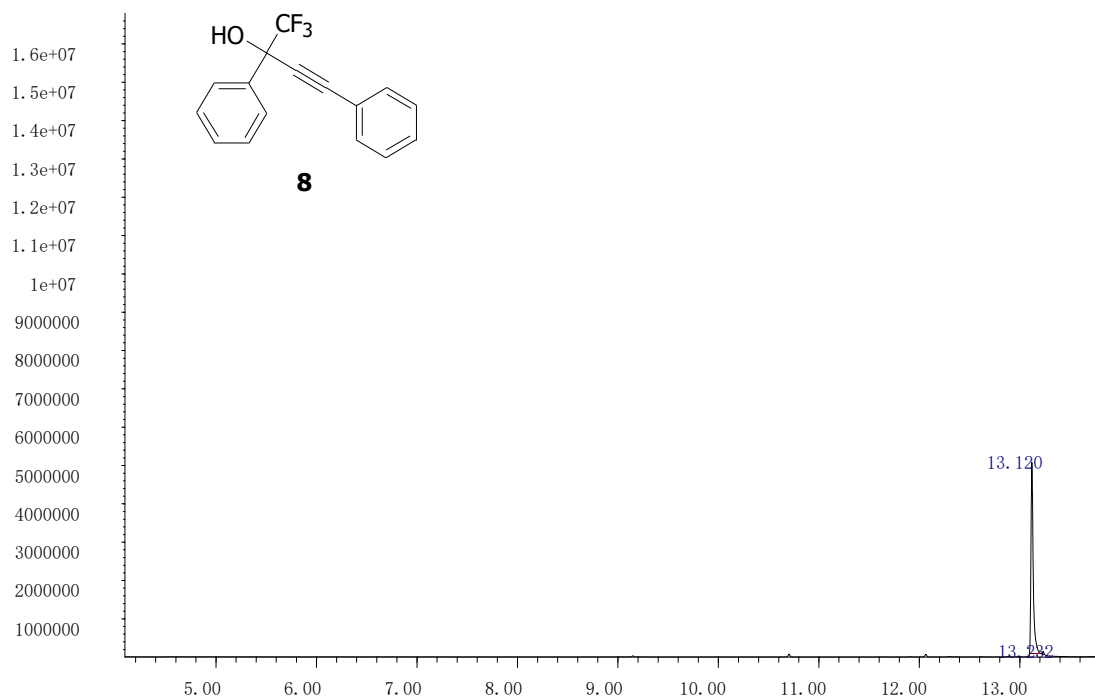

时间-->

| # | Time   | Height  | Area     | Area %  |
|---|--------|---------|----------|---------|
| 1 | 13.120 | 4992043 | 76776930 | 99.177% |
| 2 | 13.232 | 79946   | 636887   | 0.823%  |

丰度

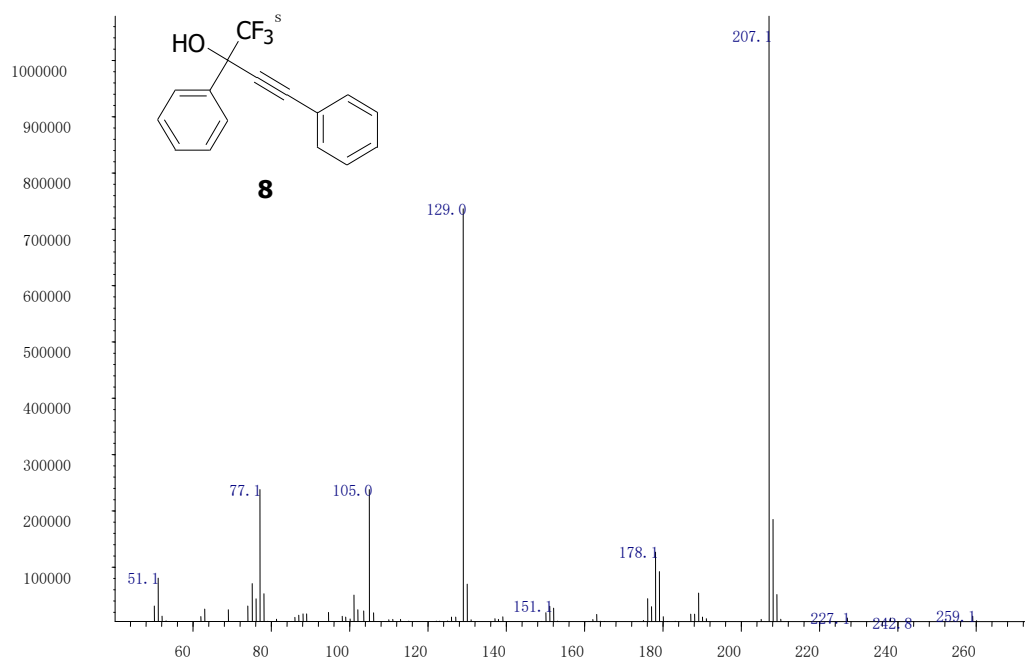

m/z-->

# S-10. LC-MS spectra of formation of 3a

t=1 h

<Chromatogram>

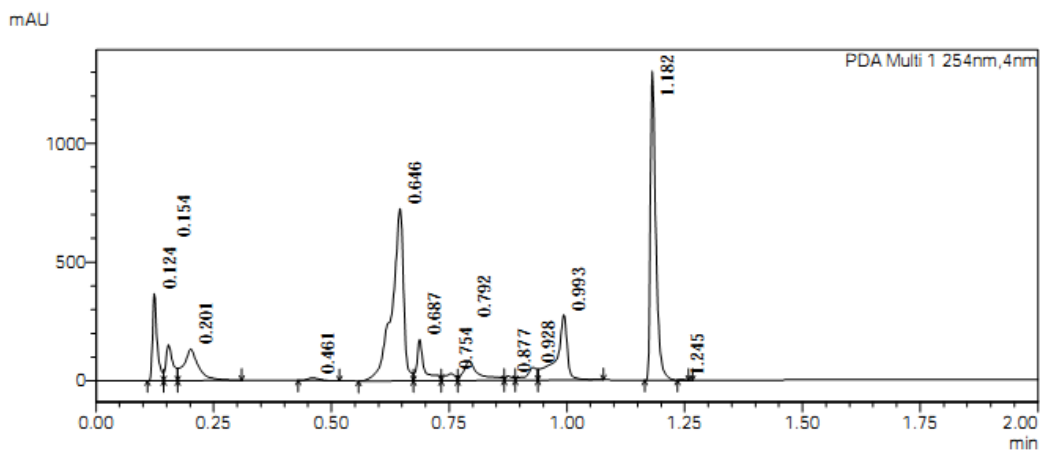

Peak Table

PDA Ch1 254nm

| Peak# | Ret. Time | Height  | Height% | Area    | Area%   |
|-------|-----------|---------|---------|---------|---------|
| 1     | 0.124     | 357211  | 10.913  | 250065  | 6.285   |
| 2     | 0.154     | 150568  | 4.600   | 156152  | 3.925   |
| 3     | 0.201     | 131738  | 4.025   | 290622  | 7.305   |
| 4     | 0.461     | 10258   | 0.313   | 19005   | 0.478   |
| 5     | 0.646     | 718677  | 21.957  | 1253845 | 31.515  |
| 6     | 0.687     | 172735  | 5.277   | 184702  | 4.642   |
| 7     | 0.754     | 29178   | 0.891   | 47511   | 1.194   |
| 8     | 0.792     | 83979   | 2.566   | 178313  | 4.482   |
| 9     | 0.877     | 16567   | 0.506   | 18747   | 0.471   |
| 10    | 0.928     | 53462   | 1.633   | 81057   | 2.037   |
| 11    | 0.993     | 272116  | 8.314   | 442314  | 11.117  |
| 12    | 1.182     | 1273983 | 38.922  | 1054600 | 26.507  |
| 13    | 1.245     | 2689    | 0.082   | 1660    | 0.042   |
| Total |           | 3273160 | 100.000 | 3978592 | 100.000 |

Mass Spectrum

Line#:1 R.Time:0.128(Scan#:21)

MassPeaks:388

Spectrum Mode:Averaged 0.119-0.136(20-22) BasePeak:191(31740)

BG Mode:Calc Segment 1 - Event 1

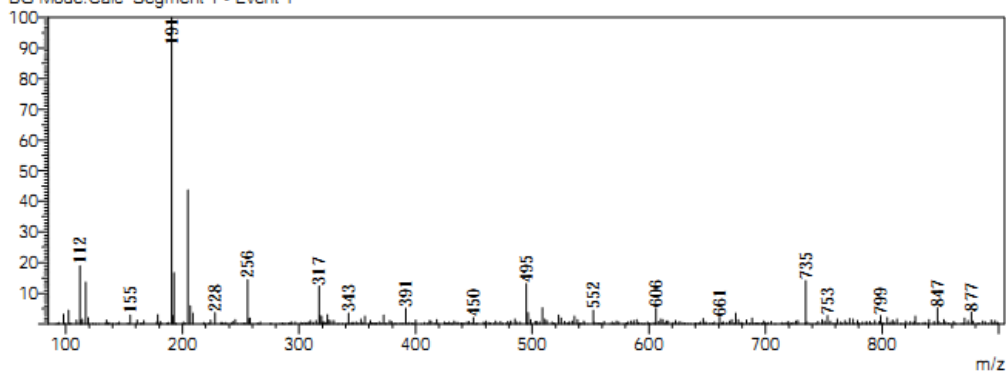



Line#:2 R.Time:0.203(Scan#:30)  
MassPeaks:404  
Spectrum Mode:Averaged 0.194-0.211(29-31) BasePeak:130(576714)  
BG Mode:Calc Segment 1 - Event 1

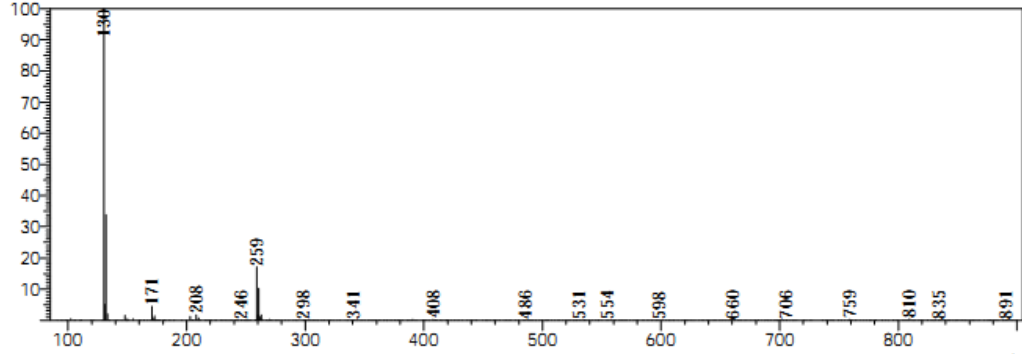

Line#:3 R.Time:0.644(Scan#:83)  
MassPeaks:412  
Spectrum Mode:Averaged 0.636-0.653(82-84) BasePeak:181(1215288)  
BG Mode:Calc Segment 1 - Event 1

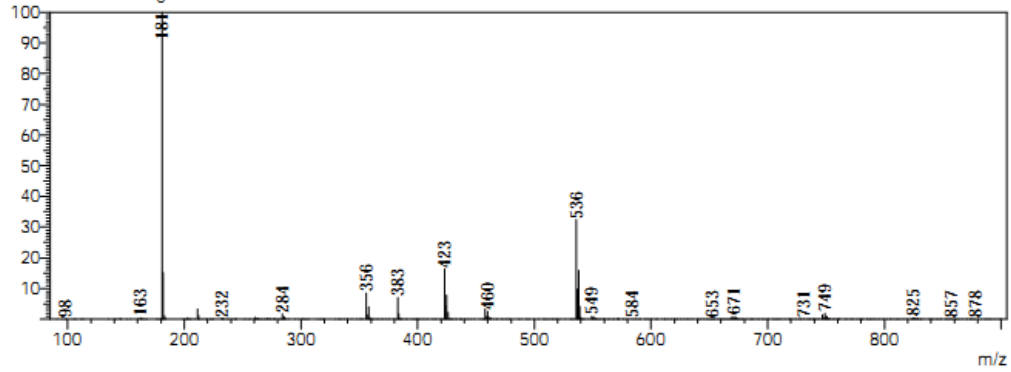

Line#:4 R.Time:0.994(Scan#:125)  
MassPeaks:347  
Spectrum Mode:Averaged 0.986-1.003(124-126) BasePeak:279(98412)  
BG Mode:Calc Segment 1 - Event 1

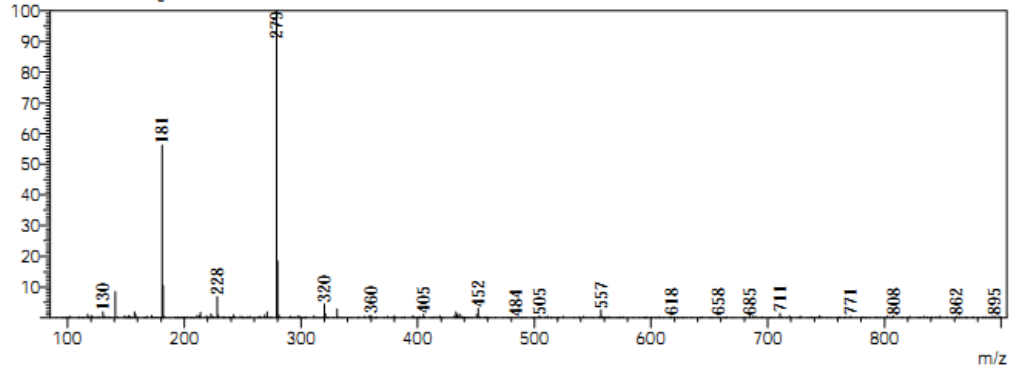

Line#:5 R.Time:1.178(Scan#:147)  
MassPeaks:396  
Spectrum Mode:Averaged 1.169-1.186(146-148) BasePeak:279(2318)  
BG Mode:Calc Segment 1 - Event 1

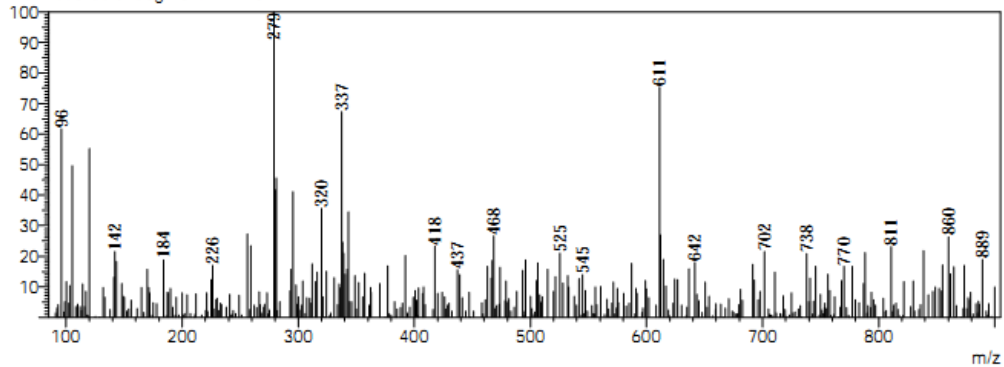

t=2 h

<Chromatogram>

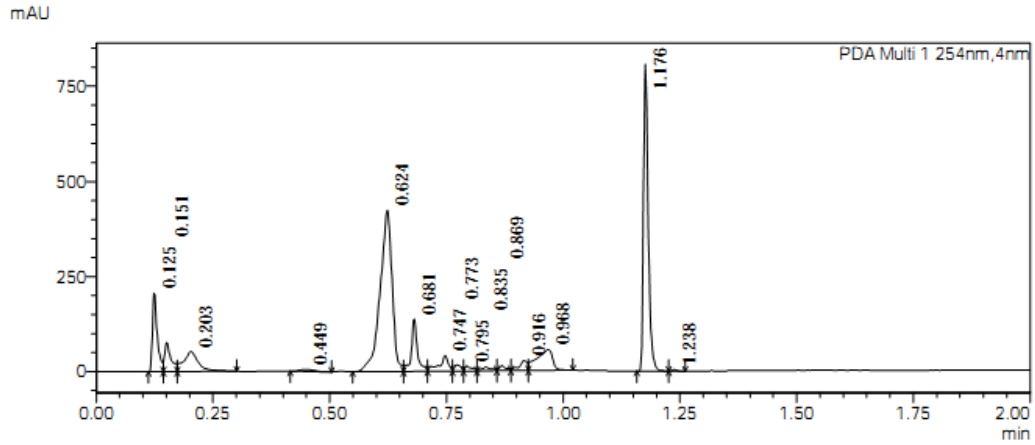

Peak Table

PDA Ch1 254nm

| Peak# | Ret. Time | Height  | Height% | Area    | Area%   |
|-------|-----------|---------|---------|---------|---------|
| 1     | 0.125     | 203841  | 11.008  | 150370  | 7.215   |
| 2     | 0.151     | 75819   | 4.094   | 71607   | 3.436   |
| 3     | 0.203     | 52467   | 2.833   | 117651  | 5.645   |
| 4     | 0.449     | 5322    | 0.287   | 11117   | 0.533   |
| 5     | 0.624     | 423414  | 22.866  | 761325  | 36.528  |
| 6     | 0.681     | 132132  | 7.136   | 122513  | 5.878   |
| 7     | 0.747     | 39879   | 2.154   | 56498   | 2.711   |
| 8     | 0.773     | 15392   | 0.831   | 18119   | 0.869   |
| 9     | 0.795     | 12486   | 0.674   | 13949   | 0.669   |
| 10    | 0.835     | 9678    | 0.523   | 14397   | 0.691   |
| 11    | 0.869     | 13178   | 0.712   | 13390   | 0.642   |
| 12    | 0.916     | 26212   | 1.416   | 32760   | 1.572   |
| 13    | 0.968     | 55271   | 2.985   | 128917  | 6.185   |
| 14    | 1.176     | 782900  | 42.279  | 568810  | 27.291  |
| 15    | 1.238     | 3760    | 0.203   | 2791    | 0.134   |
| Total |           | 1851751 | 100.000 | 2084213 | 100.000 |

Mass Spectrum

Line#:1 R.Time:0.128(Scan#:21)

MassPeaks:373

Spectrum Mode:Averaged 0.119-0.136(20-22) BasePeak:191(24141)

BG Mode:Calc Segment 1 - Event 1

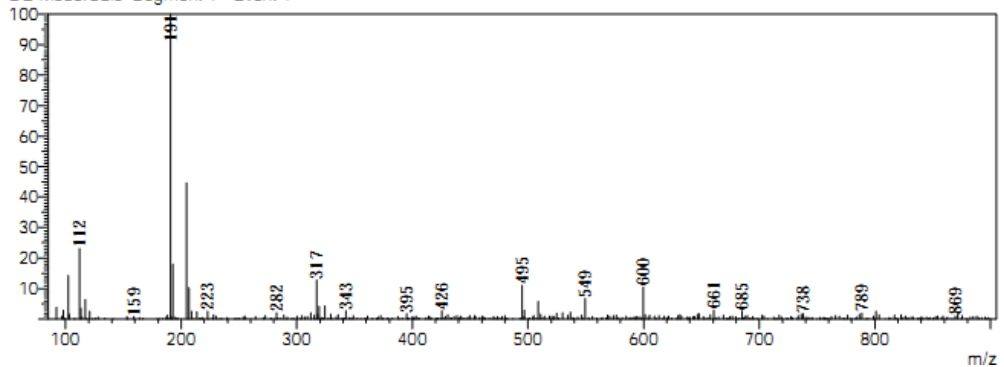

Line#:2 R.Time:0.203(Scan#:30)  
MassPeaks:429  
Spectrum Mode:Averaged 0.194-0.211(29-31) BasePeak:130(279290)  
BG Mode:Calc Segment 1 - Event 1

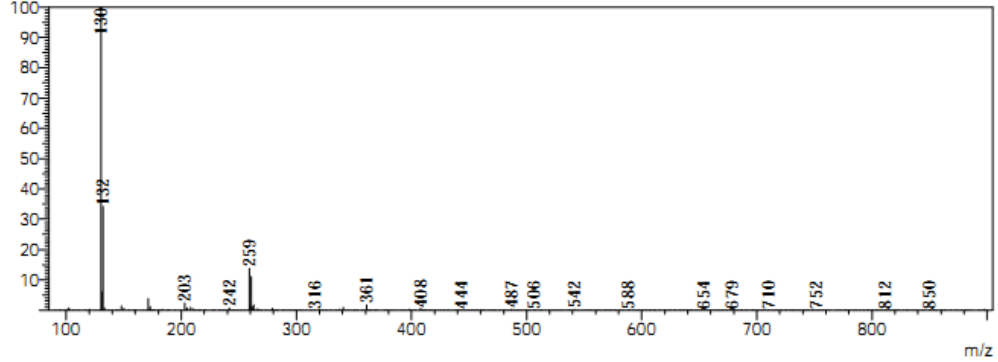

Line#:3 R.Time:0.619(Scan#:80)  
MassPeaks:395  
Spectrum Mode:Averaged 0.611-0.628(79-81) BasePeak:181(980147)  
BG Mode:Calc Segment 1 - Event 1

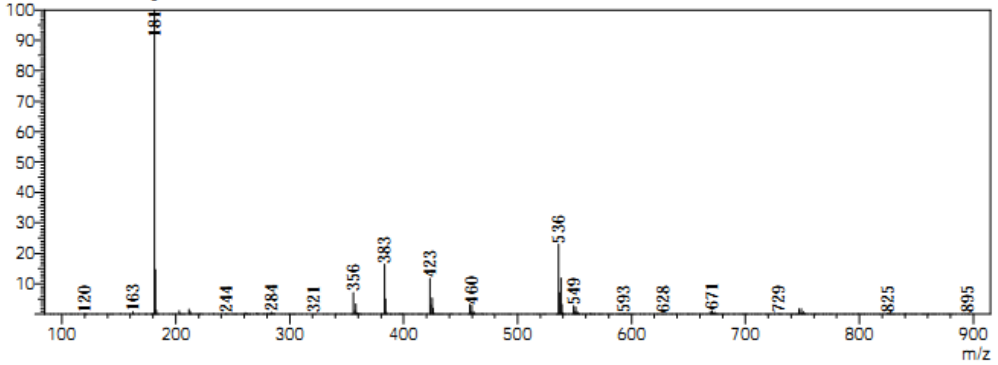

Line#:4 R.Time:0.678(Scan#:87)  
MassPeaks:424  
Spectrum Mode:Averaged 0.669-0.686(86-88) BasePeak:169(635992)  
BG Mode:Calc Segment 1 - Event 1

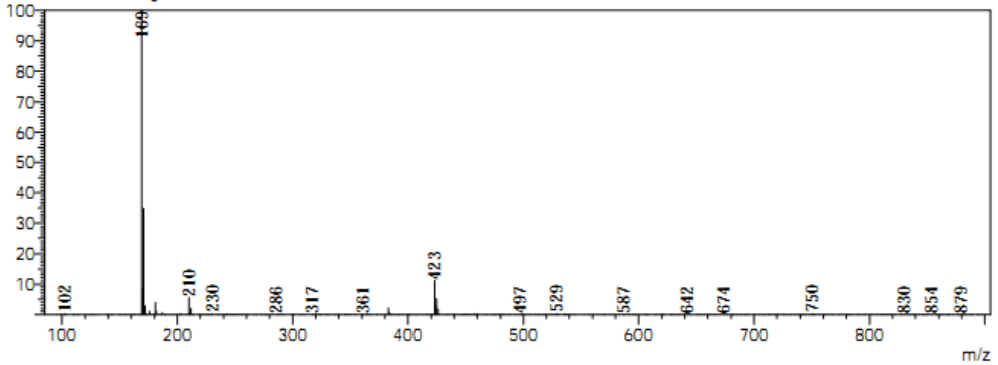

Line#:5 R.Time:0.969(Scan#:122)  
MassPeaks:319  
Spectrum Mode:Averaged 0.961-0.978(121-123) BasePeak:181(23695)  
BG Mode:Calc Segment 1 - Event 1

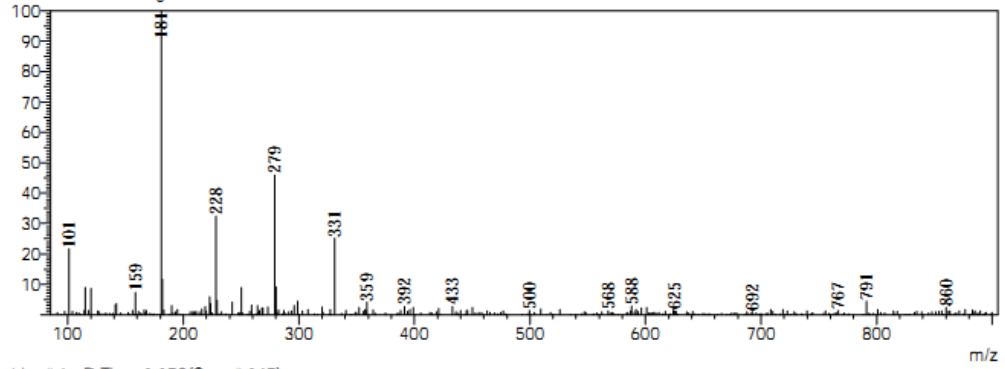

Line#:6 R.Time:1.178(Scan#:147)  
MassPeaks:389  
Spectrum Mode:Averaged 1.169-1.186(146-148) BasePeak:427(2406)  
BG Mode:Calc Segment 1 - Event 1

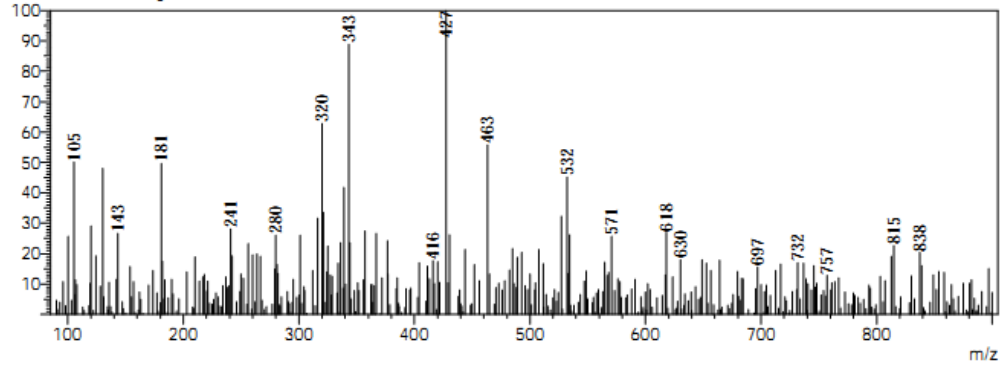

t=3 h

<Chromatogram>

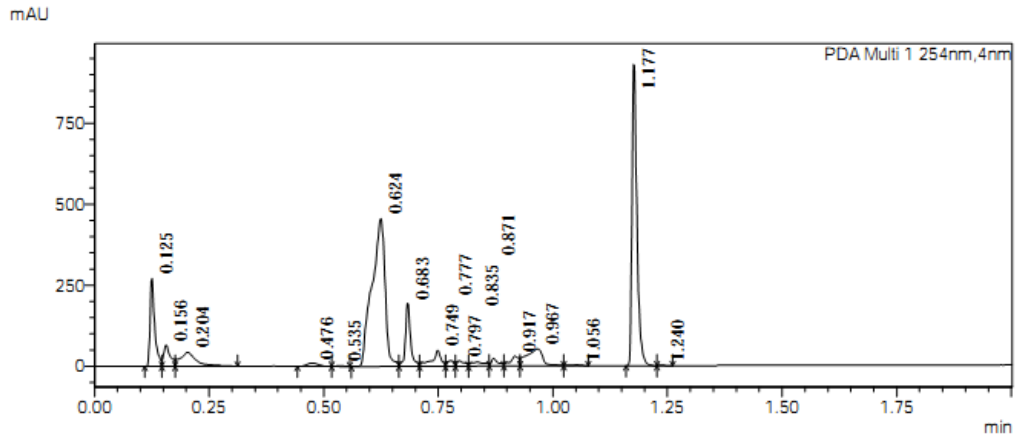

Peak Table

PDA Ch1 254nm

| Peak# | Ret. Time | Height  | Height% | Area    | Area%   |
|-------|-----------|---------|---------|---------|---------|
| 1     | 0.125     | 267286  | 12.632  | 191625  | 7.786   |
| 2     | 0.156     | 64133   | 3.031   | 65649   | 2.668   |
| 3     | 0.204     | 42700   | 2.018   | 103855  | 4.220   |
| 4     | 0.476     | 9417    | 0.445   | 16208   | 0.659   |
| 5     | 0.535     | 2677    | 0.127   | 3001    | 0.122   |
| 6     | 0.624     | 452399  | 21.380  | 907021  | 36.855  |
| 7     | 0.683     | 184691  | 8.729   | 150544  | 6.117   |
| 8     | 0.749     | 48553   | 2.295   | 66385   | 2.697   |
| 9     | 0.777     | 17172   | 0.812   | 18397   | 0.748   |
| 10    | 0.797     | 16209   | 0.766   | 20748   | 0.843   |
| 11    | 0.835     | 12135   | 0.573   | 25906   | 1.053   |
| 12    | 0.871     | 22738   | 1.075   | 24550   | 0.998   |
| 13    | 0.917     | 29862   | 1.411   | 39530   | 1.606   |
| 14    | 0.967     | 52284   | 2.471   | 127048  | 5.162   |
| 15    | 1.056     | 2273    | 0.107   | 3859    | 0.157   |
| 16    | 1.177     | 889142  | 42.021  | 694728  | 28.229  |
| 17    | 1.240     | 2285    | 0.108   | 1972    | 0.080   |
| Total |           | 2115955 | 100.000 | 2461024 | 100.000 |

Mass Spectrum

Line#:1 R.Time:0.128(Scan#:21)

MassPeaks:393

Spectrum Mode:Averaged 0.119-0.136(20-22) BasePeak:191(33234)

BG Mode:Calc Segment 1 - Event 1

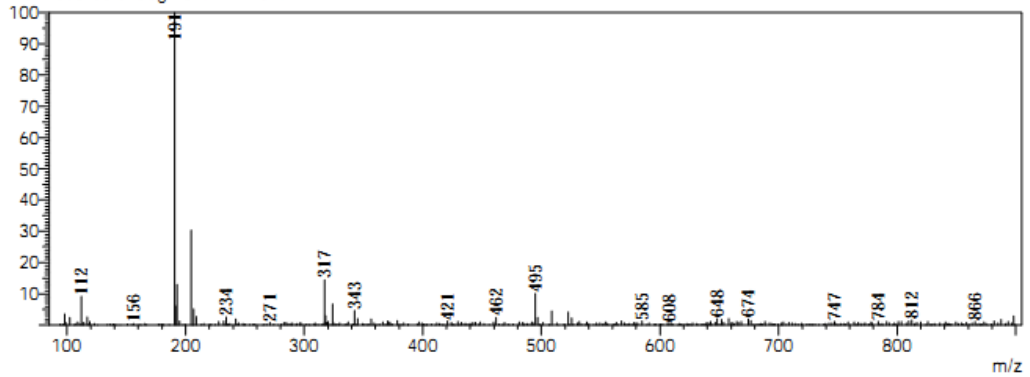

Line#:2 R.Time:0.628(Scan#:81)  
MassPeaks:400  
Spectrum Mode:Averaged 0.619-0.636(80-82) BasePeak:181(1192670)  
BG Mode:Calc Segment 1 - Event 1

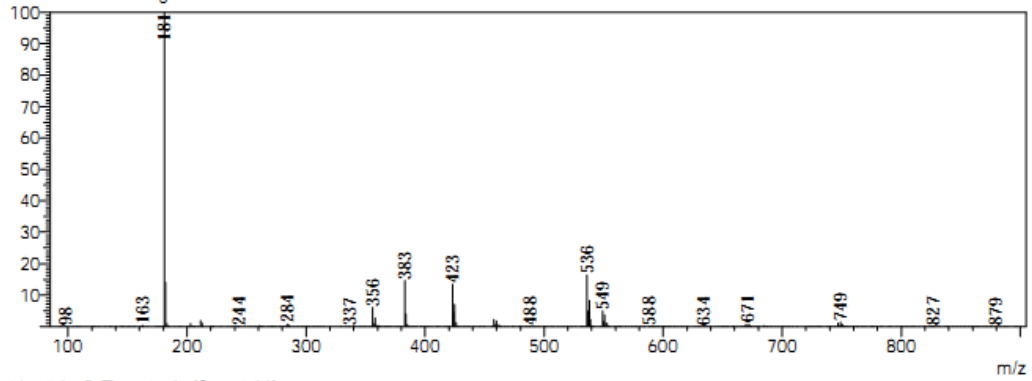

Line#:3 R.Time:0.686(Scan#:88)  
MassPeaks:426  
Spectrum Mode:Averaged 0.678-0.694(87-89) BasePeak:169(1144405)  
BG Mode:Calc Segment 1 - Event 1

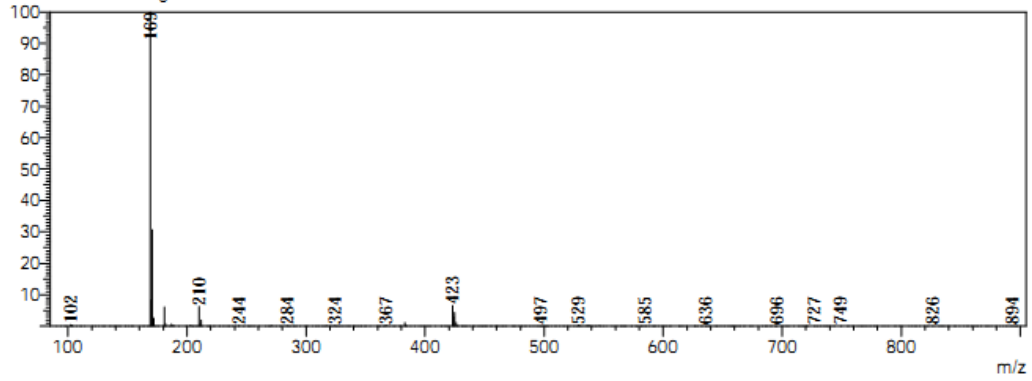

Line#:4 R.Time:0.969(Scan#:122)  
MassPeaks:329  
Spectrum Mode:Averaged 0.961-0.978(121-123) BasePeak:279(37482)  
BG Mode:Calc Segment 1 - Event 1

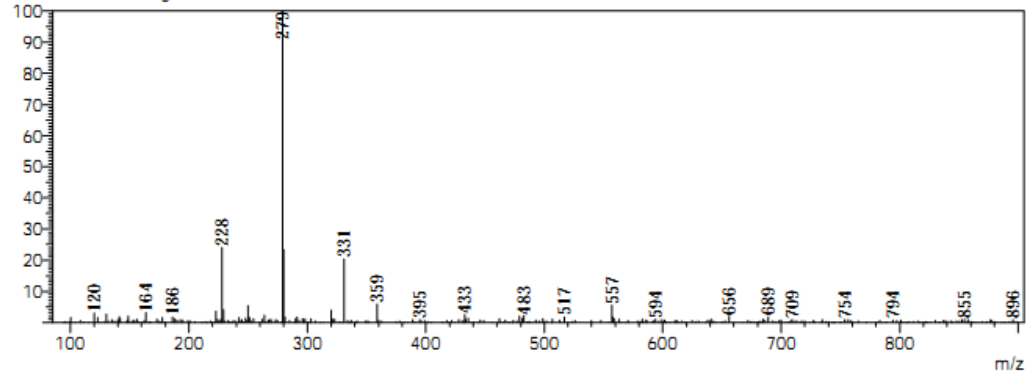

Line#:5 R.Time:1.178(Scan#:147)  
MassPeaks:375  
Spectrum Mode:Averaged 1.169-1.186(146-148) BasePeak:101(4130)  
BG Mode:Calc Segment 1 - Event 1

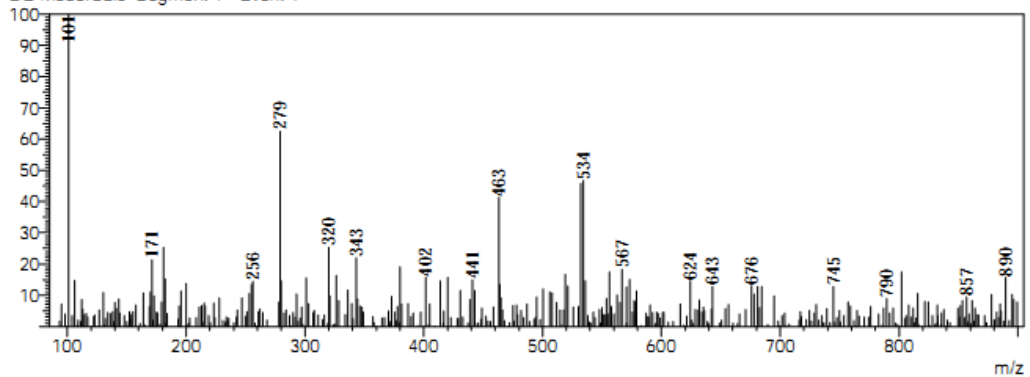

t=4 h

<Chromatogram>

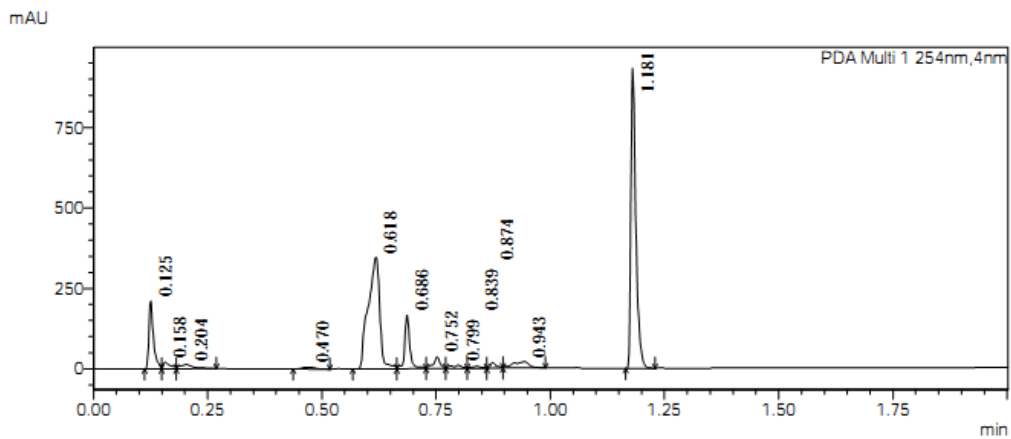

Peak Table

| Peak# | Ret. Time | Height  | Height% | Area    | Area%   |
|-------|-----------|---------|---------|---------|---------|
| 1     | 0.125     | 206054  | 11.707  | 147533  | 8.319   |
| 2     | 0.158     | 19853   | 1.128   | 23294   | 1.313   |
| 3     | 0.204     | 12495   | 0.710   | 24714   | 1.394   |
| 4     | 0.470     | 5238    | 0.298   | 9921    | 0.559   |
| 5     | 0.618     | 345985  | 19.657  | 607651  | 34.263  |
| 6     | 0.686     | 160763  | 9.134   | 129348  | 7.293   |
| 7     | 0.752     | 35901   | 2.040   | 36198   | 2.041   |
| 8     | 0.799     | 10626   | 0.604   | 16895   | 0.953   |
| 9     | 0.839     | 5621    | 0.319   | 9163    | 0.517   |
| 10    | 0.874     | 18235   | 1.036   | 16230   | 0.915   |
| 11    | 0.943     | 19743   | 1.122   | 48488   | 2.734   |
| 12    | 1.181     | 919568  | 52.246  | 704056  | 39.699  |
| Total |           | 1760081 | 100.000 | 1773492 | 100.000 |

Mass Spectrum

Line#:1 R.Time:0.128(Scan#:21)

MassPeaks:396

Spectrum Mode:Averaged 0.119-0.136(20-22) BasePeak:191(42131)

BG Mode:Calc Segment 1 - Event 1

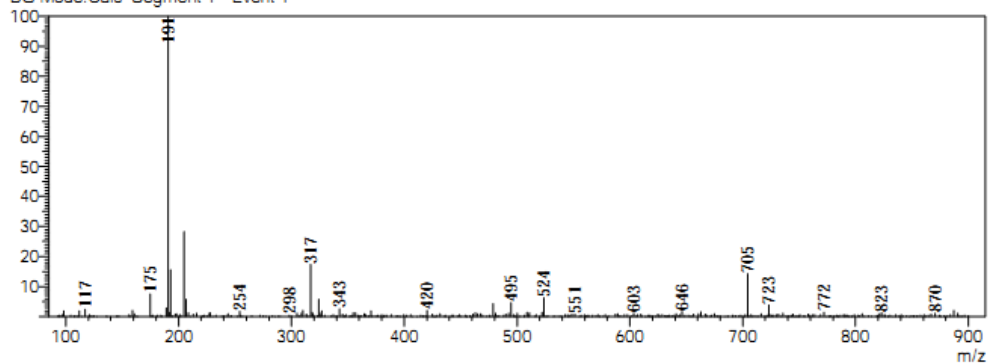

Line#:2 R.Time:0.619(Scan#:80)  
MassPeaks:404  
Spectrum Mode:Averaged 0.611-0.628(79-81) BasePeak:181(1154377)  
BG Mode:Calc Segment 1 - Event 1

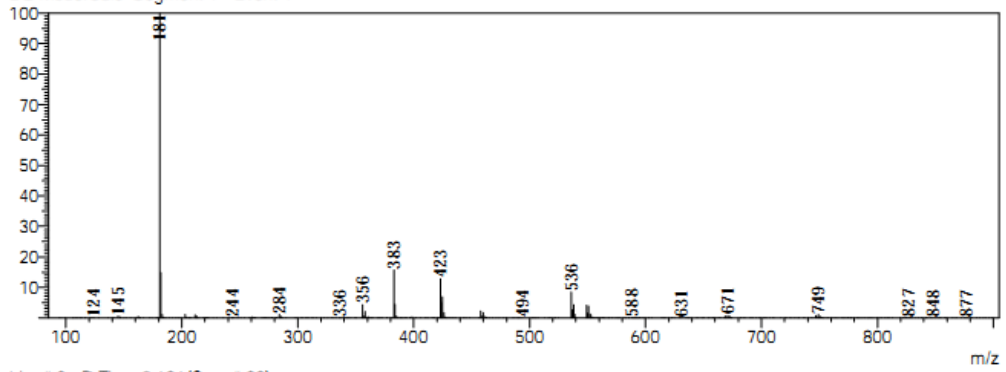

Line#:3 R.Time:0.686(Scan#:88)  
MassPeaks:441  
Spectrum Mode:Averaged 0.678-0.694(87-89) BasePeak:169(1056608)  
BG Mode:Calc Segment 1 - Event 1

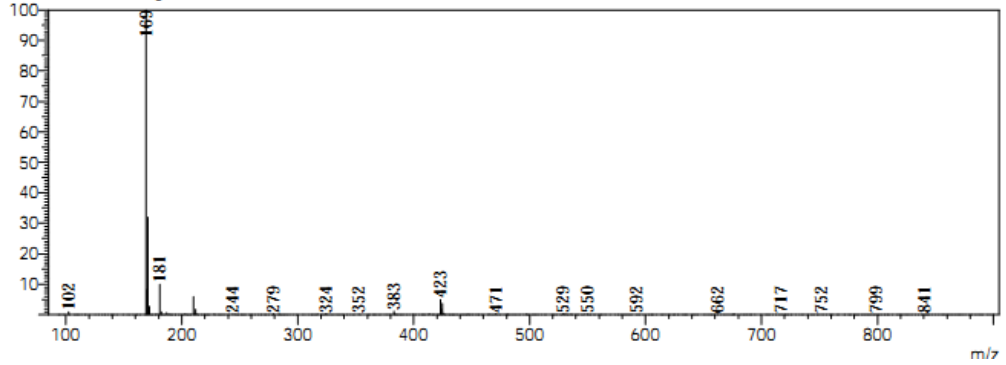

Line#:4 R.Time:1.178(Scan#:147)  
MassPeaks:389  
Spectrum Mode:Averaged 1.169-1.186(146-148) BasePeak:293(3561)  
BG Mode:Calc Segment 1 - Event 1

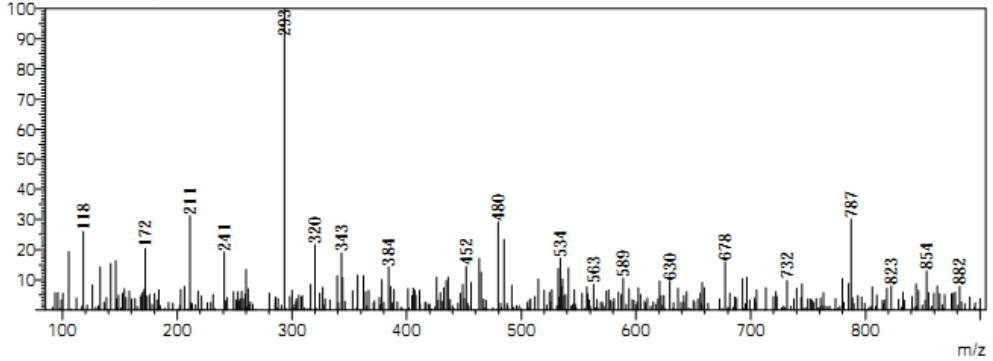



t=5 h

<Chromatogram>

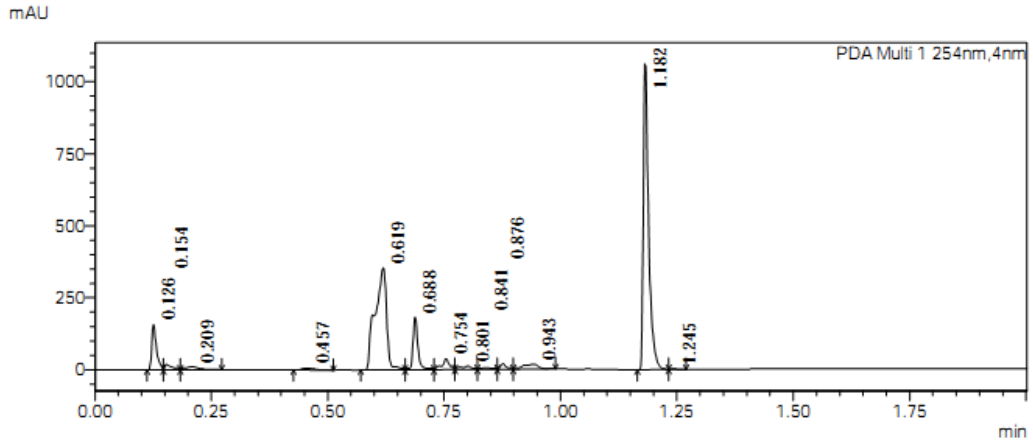

Peak Table

PDA Ch1 254nm

| Peak# | Ret. Time | Height  | Height% | Area    | Area%   |
|-------|-----------|---------|---------|---------|---------|
| 1     | 0.126     | 149048  | 8.179   | 111871  | 5.928   |
| 2     | 0.154     | 18547   | 1.018   | 23678   | 1.255   |
| 3     | 0.209     | 9826    | 0.539   | 21178   | 1.122   |
| 4     | 0.457     | 5513    | 0.302   | 10858   | 0.575   |
| 5     | 0.619     | 350658  | 19.241  | 607135  | 32.169  |
| 6     | 0.688     | 181479  | 9.958   | 135167  | 7.162   |
| 7     | 0.754     | 37388   | 2.052   | 40719   | 2.158   |
| 8     | 0.801     | 12316   | 0.676   | 20425   | 1.082   |
| 9     | 0.841     | 5830    | 0.320   | 10605   | 0.562   |
| 10    | 0.876     | 19265   | 1.057   | 17523   | 0.928   |
| 11    | 0.943     | 17490   | 0.960   | 41298   | 2.188   |
| 12    | 1.182     | 1012725 | 55.570  | 844559  | 44.750  |
| 13    | 1.245     | 2334    | 0.128   | 2285    | 0.121   |
| Total |           | 1822418 | 100.000 | 1887302 | 100.000 |

Mass Spectrum

Line#:1 R.Time:0.126(Scan#:21)

MassPeaks:384

Spectrum Mode:Averaged 0.119-0.136(20-22) BasePeak:191(20480)

BG Mode:Calc Segment 1 - Event 1

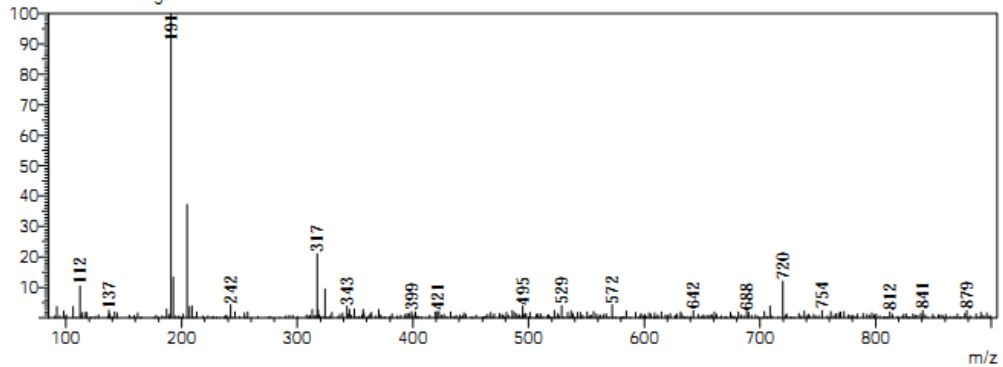

Line#:2 R.Time:0.619(Scan#:80)  
MassPeaks:373  
Spectrum Mode:Averaged 0.611-0.628(79-81) BasePeak:181(1101305)  
BG Mode:Calc Segment 1 - Event 1

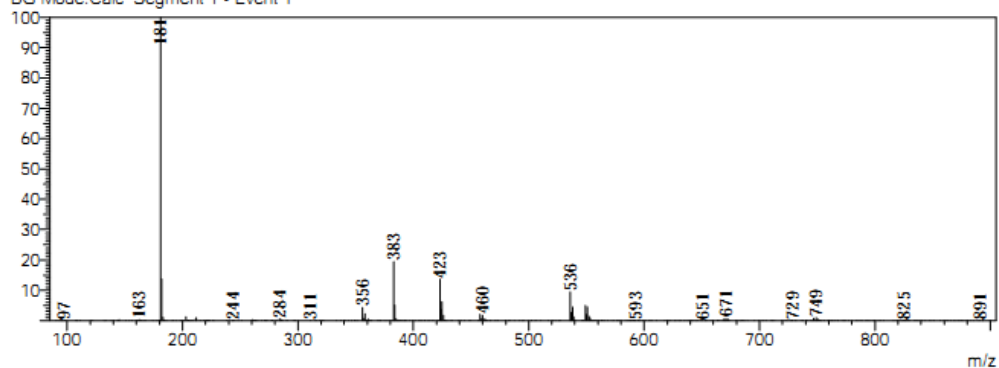

Line#:3 R.Time:0.686(Scan#:88)  
MassPeaks:421  
Spectrum Mode:Averaged 0.678-0.694(87-89) BasePeak:169(981361)  
BG Mode:Calc Segment 1 - Event 1

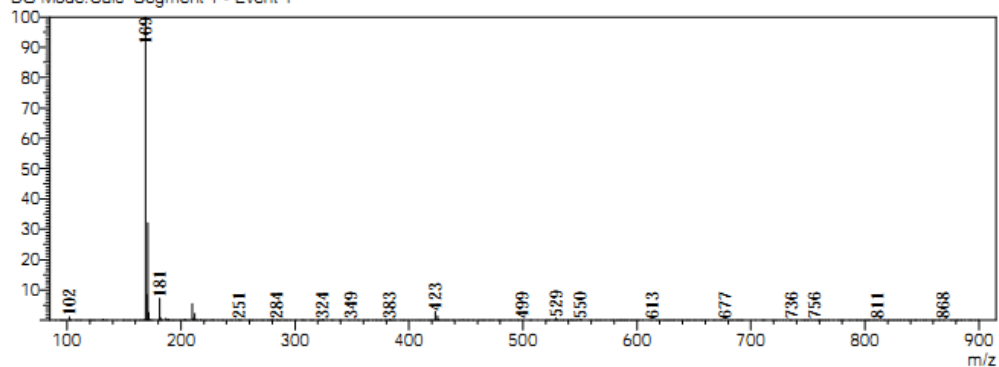

Line#:4 R.Time:1.186(Scan#:148)  
MassPeaks:379  
Spectrum Mode:Averaged 1.178-1.194(147-149) BasePeak:101(15900)  
BG Mode:Calc Segment 1 - Event 1

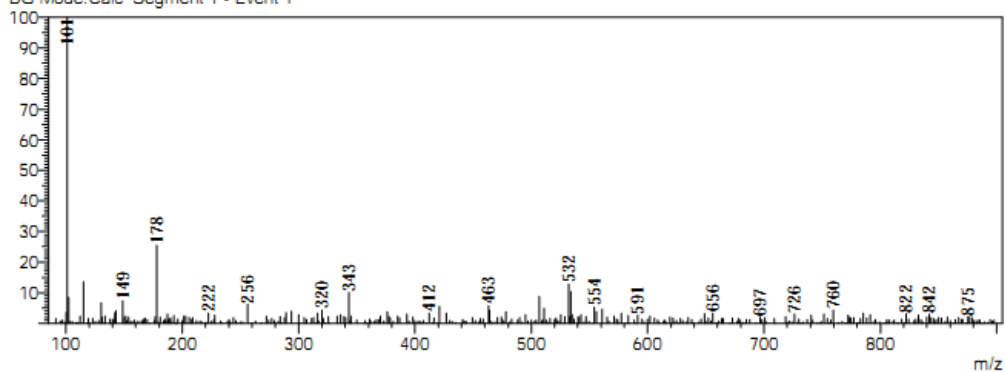

t=12 h

<Chromatogram>

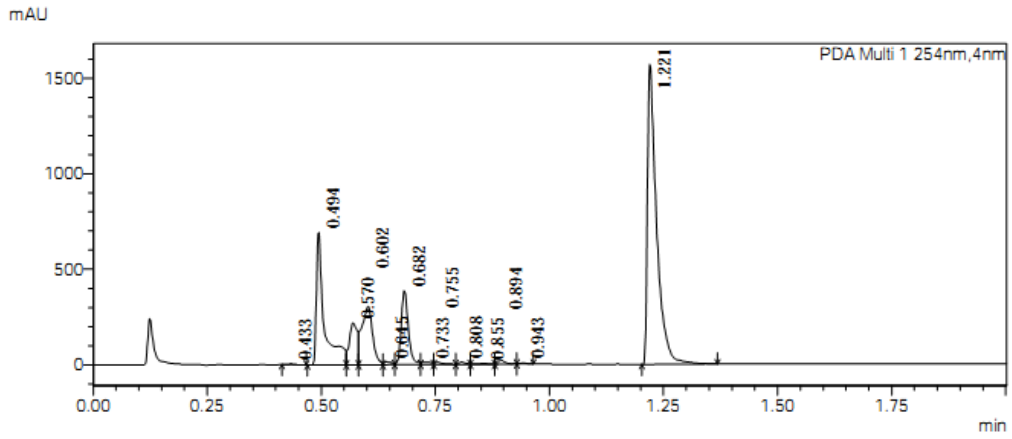

Peak Table

| Peak# | Ret. Time | Height  | Height% | Area    | Area%   |
|-------|-----------|---------|---------|---------|---------|
| 1     | 0.433     | 3253    | 0.101   | 3313    | 0.077   |
| 2     | 0.494     | 671849  | 20.836  | 839896  | 19.509  |
| 3     | 0.570     | 218048  | 6.762   | 265948  | 6.177   |
| 4     | 0.602     | 303498  | 9.412   | 499546  | 11.603  |
| 5     | 0.645     | 13275   | 0.412   | 16741   | 0.389   |
| 6     | 0.682     | 386589  | 11.989  | 415124  | 9.642   |
| 7     | 0.733     | 10864   | 0.337   | 17187   | 0.399   |
| 8     | 0.755     | 11269   | 0.349   | 13854   | 0.322   |
| 9     | 0.808     | 11534   | 0.358   | 11511   | 0.267   |
| 10    | 0.855     | 5226    | 0.162   | 8414    | 0.195   |
| 11    | 0.894     | 21315   | 0.661   | 21684   | 0.504   |
| 12    | 0.943     | 6429    | 0.199   | 5902    | 0.137   |
| 13    | 1.221     | 1561384 | 48.422  | 2186074 | 50.778  |
| Total |           | 3224534 | 100.000 | 4305195 | 100.000 |

Mass Spectrum

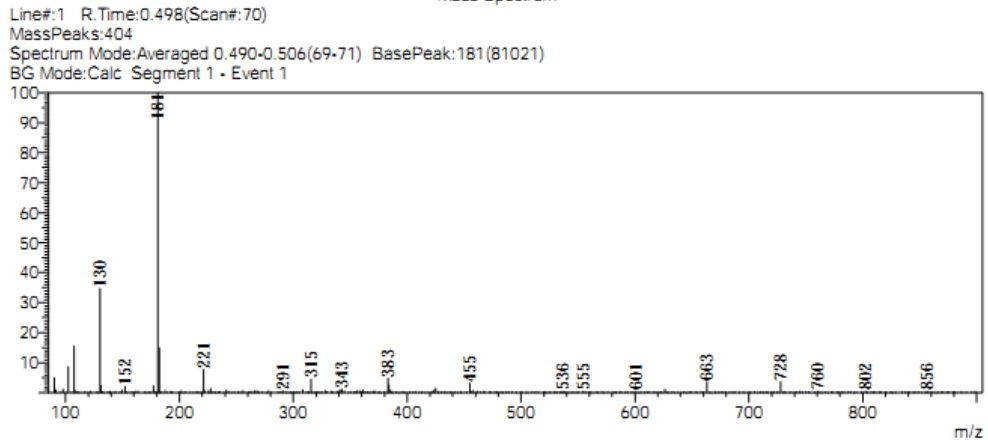

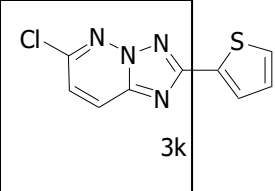

Line#:2 R.Time:0.573(Scan#:79)  
 MassPeaks:323  
 Spectrum Mode:Averaged 0.565-0.581(78-80) BasePeak:103(2108)  
 BG Mode:Calc Segment 1 - Event 1

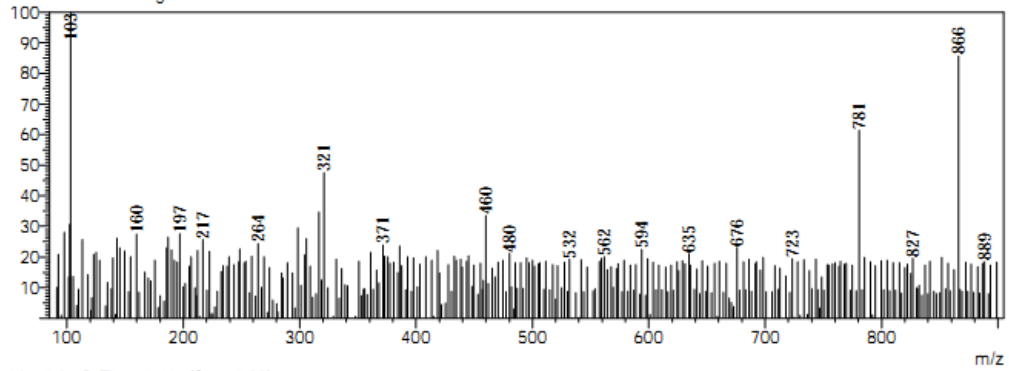

Line#:3 R.Time:0.606(Scan#:83)  
 MassPeaks:352  
 Spectrum Mode:Averaged 0.598-0.615(82-84) BasePeak:181(27190)  
 BG Mode:Calc Segment 1 - Event 1

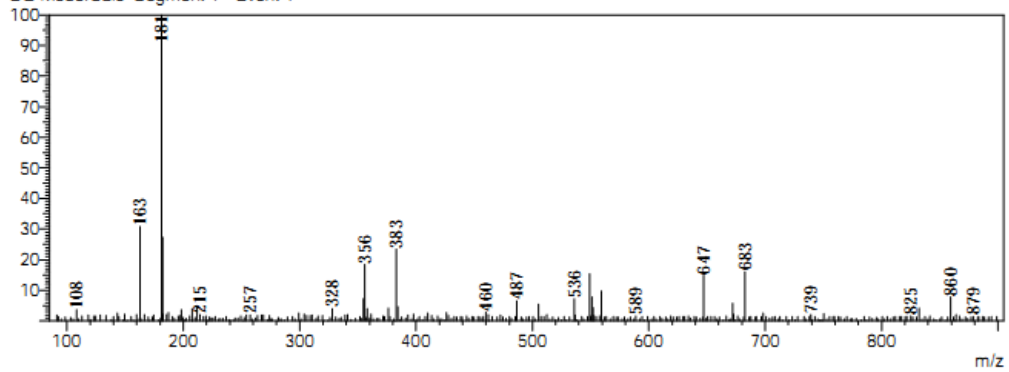

Line#:4 R.Time:0.681(Scan#:92)  
 MassPeaks:350  
 Spectrum Mode:Averaged 0.673-0.690(91-93) BasePeak:169(279411)  
 BG Mode:Calc Segment 1 - Event 1

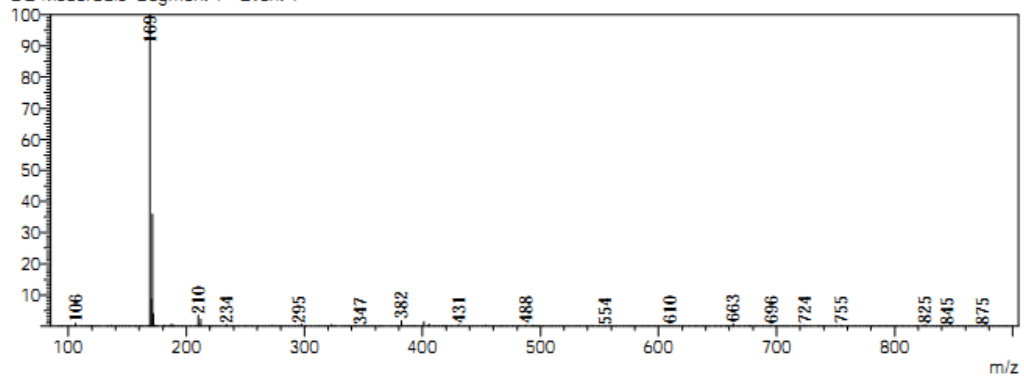

Line#:5 R.Time:1.223(Scan#:157)  
 MassPeaks:410  
 Spectrum Mode:Averaged 1.215-1.231(156-158) BasePeak:386(8559)  
 BG Mode:Calc Segment 1 - Event 1

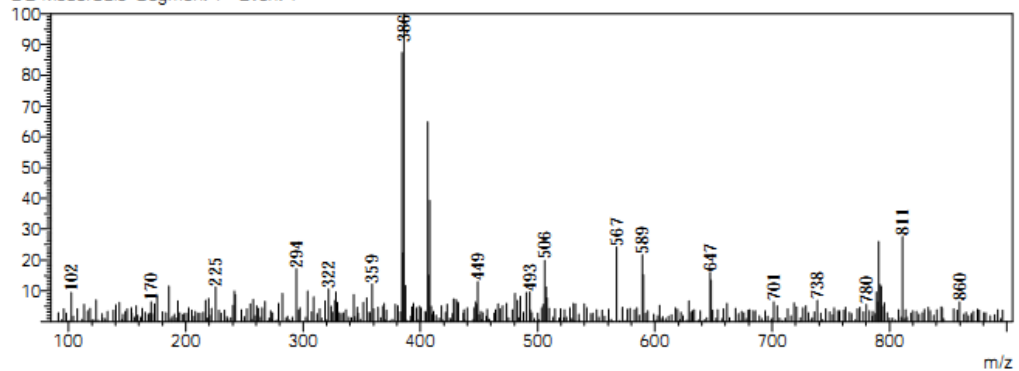

Supplement: c7ra06727e1.pdf [file c7ra06727e1.pdf]
